# Supplementary material for: Transition-metal-free oxidative cyclization reaction of enynals to access pyrane-2-one derivatives
Source: Royal Society of Chemistry journal article supplement (doi:10.1039/d1ob00726b), 2021-01-01
Supplement: d1ob00726b1.pdf [file d1ob00726b1.pdf]

## Supplementary Information

### Metal-Free Oxidative Cyclization Reaction of Enynals to Access Pyrane-2-one Derivatives

Farzaneh Ansari,<sup>†, ‡</sup> Hormoz Khosravi,<sup>†</sup> Alireza Abbasi Kejani,<sup>†</sup> Mahsa Armaghan,<sup>§</sup> Walter Frank,<sup>§</sup> Saeed Balalaie,<sup>\*, †, †</sup> Farnaz Jafarpour<sup>\*, ‡</sup>

<sup>†</sup> Peptide Chemistry Research Center, K. N. Toosi University of Technology, P. O. Box 15875-4416, Tehran, Iran,  
[balalaie@kntu.ac.ir](mailto:balalaie@kntu.ac.ir)

<sup>‡</sup> School of Chemistry, College of Science, University of Tehran, Tehran 1417466191, Iran, [Jafarpur@khayam.ut.ac.ir](mailto:Jafarpur@khayam.ut.ac.ir)

<sup>§</sup> Institut für Anorganische Chemie und Strukturchemie, Heinrich-Heine-Universität Düsseldorf, Universitätsstraße 1, 40225  
Düsseldorf, Germany

<sup>||</sup> Medical Biology Research Center, Kermanshah University of Medical Sciences, Kermanshah, Iran

## Table of Contents

|                                                                                                                                                     |    |
|-----------------------------------------------------------------------------------------------------------------------------------------------------|----|
| A. General Consideration.....                                                                                                                       | 3  |
| B. Experimental procedures.....                                                                                                                     | 3  |
| B1. Typical Procedure for the Synthesis of ortho-alkynylbenzaldehyde derivatives (Sonogashira coupling reaction).....                               | 3  |
| B2. Typical Procedure for the Synthesis of quinoline-based starting materials....                                                                   | 3  |
| B3. General Procedure for the Synthesis of 2 using 1a as the Examples.....                                                                          | 4  |
| B4. General Procedure for the Synthesis of 4-bromo-8-methoxy-3-phenyl-1 <i>H</i> -pyrano[4,3- <i>b</i> ]quinolin-1-one 2r (Control Experiment)..... | 5  |
| C. Solvent Screening with 2-(phenylethynyl)quinoline-3-carbaldehyde, 1a .....                                                                       | 5  |
| D. Compounds Characterization Data .....                                                                                                            | 6  |
| D1. Characterization Data for final compounds .....                                                                                                 | 6  |
| D2. Characterization Data of compound 2r.....                                                                                                       | 10 |
| E. X-ray crystallographic data of compound (2a).....                                                                                                | 10 |
| F. Copies of <sup>1</sup> H and <sup>13</sup> C NMR Spectra.....                                                                                    | 16 |
| F1. <sup>1</sup> H NMR and <sup>13</sup> C NMR spectra of final compounds .....                                                                     | 16 |
| F2. <sup>1</sup> H NMR and <sup>13</sup> C NMR spectra of compound 2r.....                                                                          | 48 |
| Z- matrices .....                                                                                                                                   | 50 |
| G. References .....                                                                                                                                 | 69 |

## A. General Consideration

Synthesis of o-Alkynyl Aldehyde derivatives were performed according to literature procedures;<sup>1-8</sup> other reagents were purchased from Merck and used without further purification. Flash column chromatography was carried out using 63-200 mesh silica gel. All reactions were monitored by TLC, which was performed on precoated aluminum sheets of silica gel 60 (F254) and visualized by exposure to UV light (254 nm). Uncorrected melting points were reported using an Electrothermal 9100 apparatus. <sup>1</sup>H and <sup>13</sup>C NMR spectra were recorded with Varian - INOVA 500MHz (at 500 and 125 MHz) instrument at room temperature, using CDCl<sub>3</sub> as a solvent. Chemical shifts are referenced to tetramethylsilane as an internal standard (TMS: δ 0.00 ppm). <sup>13</sup>C NMR spectra are referenced from the solvent central peak (77.26 ppm). Chemical shifts are given in ppm. IR spectra were recorded on a Bruker Tensor 27 FT-IR spectrometer with KBr pellets. Mass spectra were recorded on an Agilent Technologies (HP) 5973 Mass spectrometer operating at an ionization potential of 20 eV. Elemental analysis (CHN) were recorded on a Thermo Finnigan Flash EA 1112 elemental analyzer.

## B. Experimental procedures

### B1. Typical Procedure for the Synthesis of ortho-alkynylbenzaldehyde derivatives (Sonogashira coupling reaction)

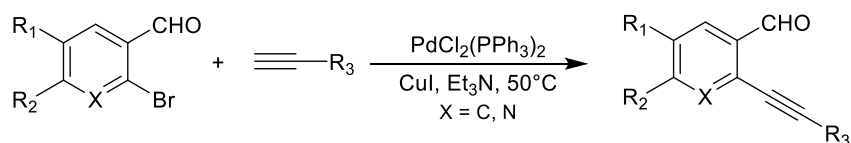

Sonogashira coupling reactions were performed following a reported method.<sup>1</sup>

To a solution of the corresponding 2-bromobenzaldehyde (1 eq), PdCl<sub>2</sub>(PPh<sub>3</sub>)<sub>2</sub> (2 mol%), and CuI (1 mol%) in NEt<sub>3</sub> (0.25 M) was added the appropriate acetylene (1.2 eq). The resulting mixture was heated under Ar atmosphere at 50°C for 6-18 hours. After the reaction was completed, the reaction mixture was quenched by addition of distilled water and extracted with CH<sub>2</sub>Cl<sub>2</sub> (three times). The combined organic layers were washed with brine, dried over Na<sub>2</sub>SO<sub>4</sub>, filtrated, and concentrated under reduced pressure. The residue was purified by column chromatography on silica gel to afford the desired products **1m**, **1n**, **1o**, and **1p**.

### B2. Typical Procedure for the Synthesis of quinoline-based starting materials

**2-chloroquinoline-3-carbaldehydes:** They were prepared by the reported procedure.<sup>9,10</sup>

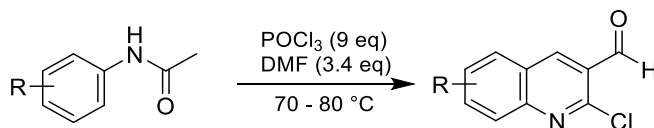

## 2-(alkylethynyl)quinoline-3-carbaldehydes and 2-(alkylethynyl)nicotinaldehyde:

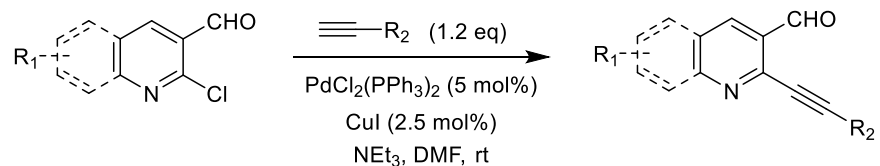

They were prepared by the Sonogashira coupling reaction of 2-chloroquinoline-3-carbaldehydes and 2-Chloro-3-pyridine carboxaldehyde with terminal alkynes.<sup>2</sup> All commercially available compounds were used as received.

**Table S1.** Starting materials

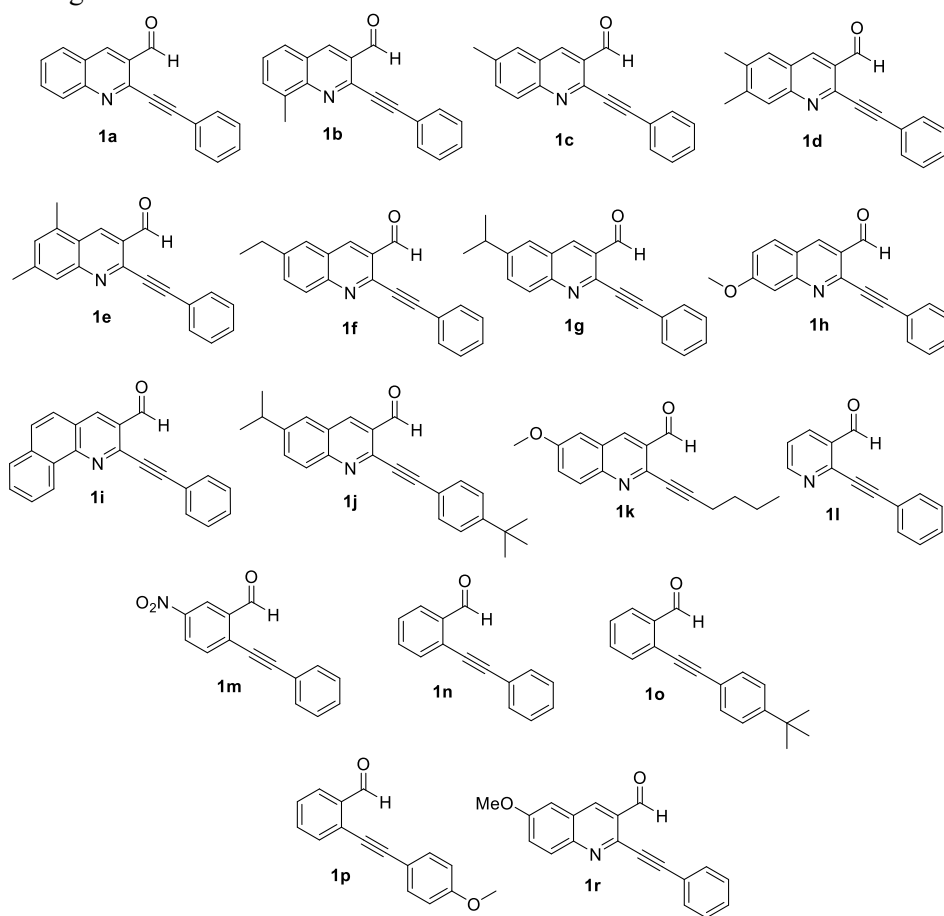

## B3. General Procedure for the Synthesis of 2 using 1a as the Examples

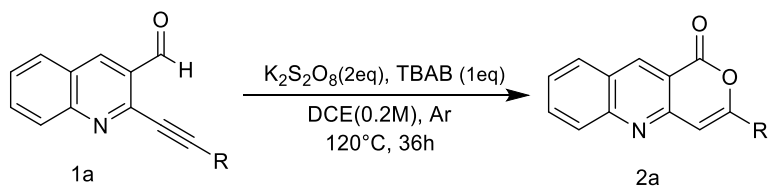

To a 10 mL dried Schlenk tube were added TBAB (128.9 mg, 0.4 mmol), K<sub>2</sub>S<sub>2</sub>O<sub>8</sub> (216.2 mg, 0.8 mmol) and followed by addition of compound **1a** (102.9 mg, 0.4mmol) and DCE (2.0 mL, 0.2M). The formed mixture was sealed and was stirred at 120 °C under Ar atmosphere for 36 h. The solution was then cooled to rt, and DCE was removed under vaccum directly. The crude product was purified by column chromatography on silica gel (eluent: *n*-Hexane/ethyl acetate 5: 1) to afford the desired product **2a**.

#### B4. General Procedure for the Synthesis of 4-bromo-8-methoxy-3-phenyl-1H-pyrano[4,3-b]quinolin-1-one **2q** (Control Experiment)

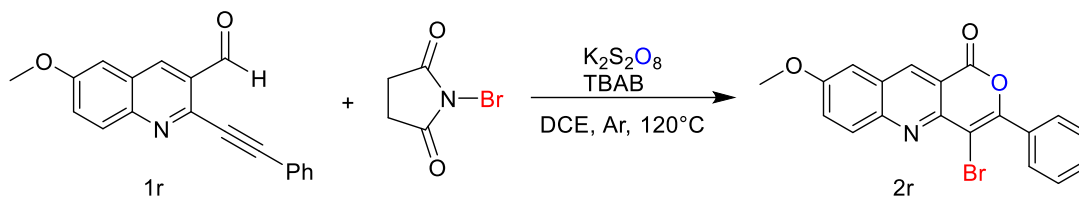

To a 10 mL dried Schlenk tube were added TBAB (128.9 mg, 0.4 mmol), K<sub>2</sub>S<sub>2</sub>O<sub>8</sub> (216.2 mg, 0.8 mmol), NBS (71 mg, 0.4 mmol) and followed by addition of compound **1r** (102.9 mg, 0.4mmol) and DCE (2.0 mL, 0.2M). The formed mixture was sealed and was stirred at 120 °C under Ar atmosphere for 36 h. The solution was then cooled to rt, and DCE was removed under vaccum directly. The crude product was purified by column chromatography on silica gel (eluent: *n*-Hexane/ethyl acetate 5: 1) to afford the desired product **2q**.

### C. Solvent Screening with 2-(phenylethynyl)quinoline-3-carbaldehyde, **1a**

**Table S2.** Solvent screening<sup>a</sup> with 2-(phenylethynyl)quinoline-3-carbaldehyde, **1a**

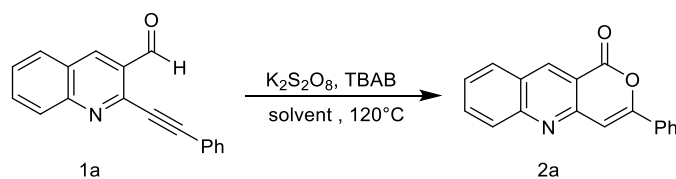

| entry | solvent              | yield (%) <sup>b</sup> |
|-------|----------------------|------------------------|
| 1     | PhCl                 | 50                     |
| 2     | <b>DCE</b>           | <b>82</b>              |
| 3     | DCE/H <sub>2</sub> O | 55                     |
| 4     | DMSO                 | ND <sup>c</sup>        |
| 5     | Benzene              | 25                     |
| 6     | Toluene              | Trace                  |
| 7     | ACN                  | 23                     |
| 8     | Neat                 | Trace                  |

<sup>a</sup>Reaction conditions: **1a** (51.0 mg, 0.2 mmol), K<sub>2</sub>S<sub>2</sub>O<sub>8</sub> (2.0 equiv.), TBAB (1.0 equiv.), DCE (1.0 ml), under Ar atmosphere, 120 °C and 36 h. <sup>b</sup> Isolated yields, <sup>c</sup>ND = Not detected.

## D. Compounds Characterization Data

### D1. Characterization Data for final compounds

#### 3-phenyl-1H-pyrano [4,3-b]quinolin-1-one (2a)

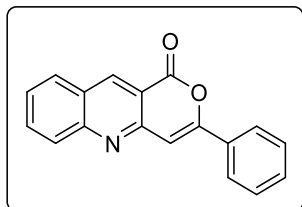

Yellow solid; Yield 82% (89mg); m.p. 132-134°C;  $R_f$  = 0.18 on silica gel (Hexane/EtOAc 5:1);  $^1\text{H NMR}$  (500 MHz,  $\text{CDCl}_3$ )  $\delta$  7.27 (s, 1H), 7.44-7.50 (m, 3H), 7.57 (t,  $J$  = 7.5 Hz, 1H), 7.85 (t,  $J$  = 7.7 Hz, 1H), 7.90-7.97 (m, 3H), 8.08 (d,  $J$  = 8.5 Hz, 1H), 9.10 (s, 1H)  $^{13}\text{C NMR}$  (125 MHz,  $\text{CDCl}_3$ )  $\delta$  162.1, 157.0, 152.7, 151.8, 140.6, 133.6, 131.5, 130.9, 129.6, 129.1, 127.1, 127.1, 125.7, 115.7, 103.8. **IR** ( $\text{cm}^{-1}$ )  $\nu$  3053, 2924, 1733, 1603, 1489, 1364, 1269, 1206, 1160, 1045. **MS** (EI, 70 eV)  $m/z$

$[\text{M}]^+$  found for  $\text{C}_{18}\text{H}_{11}\text{NO}_2$ : 273. **Anal. Calcd** for  $\text{C}_{18}\text{H}_{11}\text{NO}_2$ : C, 79.11; H, 4.06; N, 5.13; Found: C, 78.84; H, 3.97; N, 5.00.

#### 6-methyl-3-phenyl-1H-pyrano[4,3-b]quinolin-1-one (2b)

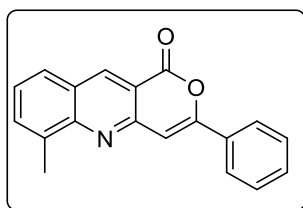

Yellow solid; Yield 88% (101mg); m.p. 137-139°C;  $R_f$  = 0.53 on silica gel (Hexane/EtOAc 5:1);  $^1\text{H NMR}$  (500 MHz,  $\text{CDCl}_3$ )  $\delta$  2.79 (s, 3H), 7.27 (s, 1H), 7.37 – 7.51 (m, 4H), 7.64 (d,  $J$  = 6.6 Hz, 1H), 7.74 (d,  $J$  = 8.0 Hz, 1H), 7.92 (d,  $J$  = 7.1 Hz, 2H), 8.98 (s, 1H)  $^{13}\text{C NMR}$  (125 MHz,  $\text{CDCl}_3$ )  $\delta$  162.3, 156.3, 151.6, 150.9, 140.4, 137.2, 133.3, 131.6, 130.7, 130.6, 129.0, 127.5, 127.0, 126.8, 125.6, 115.2, 104.3, 18.2. **IR** ( $\text{cm}^{-1}$ )  $\nu$  3056, 2916, 2852, 1736, 1621, 1583, 1489, 1445, 1369, 1267,

1215, 1161, 1082, 1038. **MS** (EI, 70 eV)  $m/z$   $[\text{M}]^+$  found for  $\text{C}_{19}\text{H}_{13}\text{NO}_2$ : 287. **Anal. Calcd** for  $\text{C}_{19}\text{H}_{13}\text{NO}_2$ : C, 79.43; H, 4.56; N, 4.88; Found: C, 79.74; H, 4.67; N, 5.01.

#### 8-methyl-3-phenyl-1H-pyrano[4,3-b]quinolin-1-one (2c)

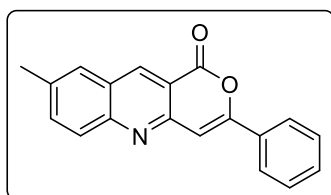

Yellow solid; Yield 81% (93mg); m.p. 156-160°C;  $R_f$  = 0.18 on silica gel (Hexane/EtOAc 5:1);  $^1\text{H NMR}$  (500 MHz,  $\text{CDCl}_3$ )  $\delta$  9.08 (s, 1H), 8.05 (d,  $J$  = 8.6 Hz, 1H), 7.98 – 7.94 (m, 2H), 7.76 – 7.72 (m, 2H), 7.53 – 7.48 (m, 3H), 7.35 (s, 1H), 2.58 (s, 3H).  $^{13}\text{C NMR}$  (125 MHz,  $\text{CDCl}_3$ )  $\delta$  162.3, 156.6, 152.0, 150.5, 139.8, 137.4, 136.2, 131.7, 130.8, 129.1, 128.7, 128.2, 127.2, 125.7, 115.7, 103.9, 32.1

**IR** ( $\text{cm}^{-1}$ )  $\nu$  2917, 1728, 1625, 1589, 1486, 1374, 1269, 1184, 1049. **MS** (EI, 70 eV)  $m/z$   $[\text{M}]^+$  found for  $\text{C}_{19}\text{H}_{13}\text{NO}_2$ : 287. **Anal. Calcd** for  $\text{C}_{19}\text{H}_{13}\text{NO}_2$ : C, 79.43; H, 4.56; N, 4.88; Found: C, 79.11; H, 4.40; N, 4.69.

#### 7,8-dimethyl-3-phenyl-1H-pyrano[4,3-b]quinolin-1-one (2d)

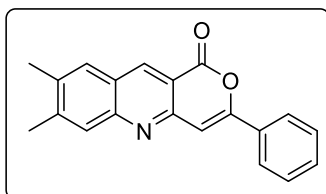

Yellow solid; Yield 78% (94mg); m.p. 157-159°C;  $R_f$  = 0.14 on silica gel (Hexane/EtOAc 5:1);  $^1\text{H NMR}$  (500 MHz,  $\text{CDCl}_3$ )  $\delta$  8.97 (s, 1H), 7.93 (d,  $J$  = 6.5 Hz, 2H), 7.86 (s, 1H), 7.68 (s, 1H), 7.44- 7.52 (m,  $J$  = 6.1, 5.4 Hz, 3H), 7.28 (s, 1H), 2.50 (s, 3H), 2.46 (s, 3H).  $^{13}\text{C NMR}$  (125 MHz,  $\text{CDCl}_3$ )  $\delta$  162.4, 156.3, 152.0, 151.0, 145.1, 139.2, 137.6, 131.8, 130.7, 129.1, 128.5, 128.3, 125.9, 125.6, 124.5, 115.0, 104.0,

21.1, 20.2 **IR** ( $\text{cm}^{-1}$ )  $\nu$  3033, 2919, 2852, 1734, 1624, 1585, 1546, 1487, 1448, 1373, 1111, 1072.

**MS (ESI)<sup>+</sup>** m/z [M]<sup>+</sup> found for C<sub>20</sub>H<sub>15</sub>NO<sub>2</sub>: 301.3. **Anal. Calcd** for C<sub>20</sub>H<sub>15</sub>NO<sub>2</sub>: C, 79.72; H, 5.02; N, 4.65; Found: C, 79.37; H, 4.94; N, 4.46.

### 7,9-dimethyl-3-phenyl-1H-pyrano[4,3-b]quinolin-1-one (2e)

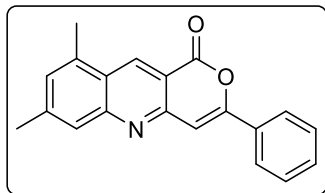

Yellow solid; Yield 77% (93mg); m.p 159-163°C; R<sub>f</sub> = 0.23 on silica gel (Hexane/EtOAc 5:1); **<sup>1</sup>H NMR (500 MHz, CDCl<sub>3</sub>)** δ 9.01 (s, 1H), 7.85 (d, J = 6.0 Hz, 2H), 7.58 (s, 1H), 7.42 – 7.45 (m, 3H), 7.10 (d, J = 10.9 Hz, 2H), 2.63 (s, 3H), 2.42 (s, 3H). **<sup>13</sup>C NMR (125 MHz, CDCl<sub>3</sub>)** δ 162.2, 156.4, 152.3, 152.1, 144.4, 136.3, 131.5, 130.6, 129.9, 128.9, 126.0, 125.5, 124.8, 114.0, 103.6, 22.3, 18.7. **IR (cm<sup>-1</sup>)** ν 3057, 2922, 2858, 1726, 1584, 1499, 1449, 1376, 1242, 1189, 1061. **MS (EI, 70 eV)** m/z [M]<sup>+</sup> found for C<sub>20</sub>H<sub>15</sub>NO<sub>2</sub>: 301. **Anal. Calcd** for C<sub>20</sub>H<sub>15</sub>NO<sub>2</sub>: C, 79.72; H, 5.02; N, 4.65; Found: C, 79.98; H, 5.21; N, 4.83.

### 8-ethyl-3-phenyl-1H-pyrano[4,3-b]quinolin-1-one (2f)

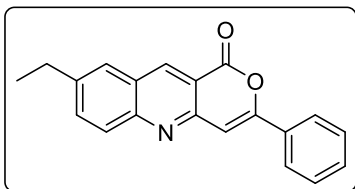

Yellow solid; Yield 84% (101mg); m.p. 161-163°C; R<sub>f</sub> = 0.25 on silica gel (Hexane/EtOAc 5:1); **<sup>1</sup>H NMR (500 MHz, CDCl<sub>3</sub>)** δ 8.96 (s, 1H), 7.95 (d, J = 8.6 Hz, 1H), 7.87 (d, J = 6.7 Hz, 2H), 7.64 – 7.68 (m, 2H), 7.44 (d, J = 6.9 Hz, 3H), 7.19 (s, 1H), 2.81 (q, 2H), 1.32 (t, J = 7.6 Hz, 3H). **<sup>13</sup>C NMR (125 MHz, CDCl<sub>3</sub>)** δ 162.1, 156.3, 151.8, 150.6, 143.3, 139.7, 135.0, 132.4, 131.5, 130.6, 129.0, 128.8, 127.1, 126.7, 125.7, 115.5, 103.8, 28.8, 15. **IR (cm<sup>-1</sup>)** ν 2926, 1727, 1624, 1588, 1475, 1373, 1264, 1197, 1054. **MS (EI, 70 eV)** m/z [M]<sup>+</sup> found for C<sub>20</sub>H<sub>15</sub>NO<sub>2</sub>: 301. **Anal. Calcd** for C<sub>20</sub>H<sub>15</sub>NO<sub>2</sub>: C, 79.72; H, 5.02; N, 4.65; Found: C, 79.88; H, 5.19; N, 4.80.

### 8-isopropyl-3-phenyl-1H-pyrano[4,3-b]quinolin-1-one (2g)

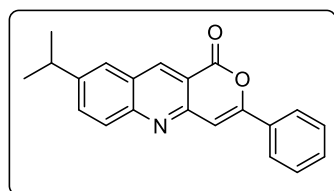

Yellow solid; Yield 84% (106mg); m.p. 149-151°C; R<sub>f</sub> = 0.25 on silica gel (Hexane/EtOAc 5:1); **<sup>1</sup>H NMR (500 MHz, CDCl<sub>3</sub>)** δ 1.36 (d, J = 6.9 Hz, 6H), 3.12 (hept, J = 6.9 Hz, 1H), 7.28 (s, 1H), 7.44-7.50 (m, 3H), 7.74 (s, 1H), 7.79 (d, J = 8.7 Hz, 1H), 7.92 (d, J = 6.9 Hz, 2H), 8.03 (d, J = 8.8 Hz, 1H), 9.07 (s, 1H). **<sup>13</sup>C NMR (125 MHz, CDCl<sub>3</sub>)** δ 162.3, 156.5, 152.0, 150.8, 148.0, 140.0, 133.9, 131.7, 130.7, 129.1, 128.9, 127.2, 125.7, 125.4, 115.6, 103.9, 34.2, 23.7. **IR (cm<sup>-1</sup>)** ν 3057, 2928, 2863, 1880, 1728, 1621, 1588, 1486, 1370, 1270, 1204, 1166, 1056. **MS (EI, 70 eV)** m/z [M]<sup>+</sup> found for C<sub>21</sub>H<sub>17</sub>NO<sub>2</sub>: 315. **Anal. Calcd** for C<sub>21</sub>H<sub>17</sub>NO<sub>2</sub>: C, 79.98; H, 5.43; N, 4.44; Found: C, 79.65; H, 5.29; N, 4.30.

### 7-methoxy-3-phenyl-1H-pyrano [4,3-b]quinolin-1-one (2h)

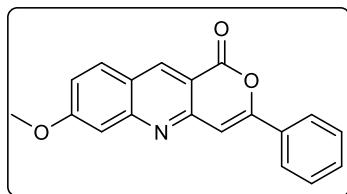

Yellow solid; Yield 84% (101mg); m.p. 182-184°C; R<sub>f</sub> = 0.2 on silica gel (Hexane/EtOAc 5:1); **<sup>1</sup>H NMR (500 MHz, CDCl<sub>3</sub>)** δ 4.00 (s, 3H), 7.20 – 7.29 (m, 2H), 7.39 (d, J = 2.4 Hz, 1H), 7.44 – 7.55 (m, 3H), 7.85 (d, J = 9.0 Hz, 1H), 7.95 (d, J = 8.0 Hz, 2H), 9.02 (s, 1H). **<sup>13</sup>C NMR (125 MHz, CDCl<sub>3</sub>)** δ 164.3, 162.4, 157.1, 154.1, 153.3, 139.8, 131.8, 130.8, 130.8, 129.1, 125.8, 122.8, 121.3, 113.7, 106.5, 103.9, 56.0. **IR (cm<sup>-1</sup>)** ν 3020, 2921, 2852, 1729, 1609, 1497, 1456, 1382, 1247, 1156, 1060,

1014. **MS (EI, 70 eV)**  $m/z$   $[M]^+$  found for  $C_{19}H_{13}NO_3$ : 303. **Anal. Calcd** for  $C_{19}H_{13}NO_3$ : C, 75.24; H, 4.32; N, 4.62; Found: C, 75.58; H, 4.43; N, 4.82.

### 10-phenyl-8H-benzo[h]pyrano[4,3-b]quinolin-8-one (2i)

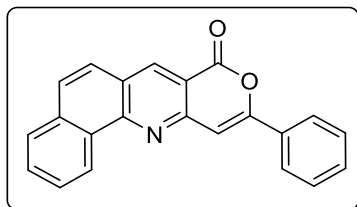

Yellow solid; Yield 87% (112mg); m.p. 218-221°C;  $R_f$  = 0.55 on silica gel (Hexane/EtOAc 5:1);  **$^1H$  NMR (500 MHz,  $CDCl_3$ )**  $\delta$  9.35 – 9.30 (m, 1H), 9.00 (d,  $J$  = 9.4 Hz, 1H), 8.02 – 7.97 (m, 2H), 7.90 – 7.87 (m, 1H), 7.79 – 7.75 (m, 3H), 7.72 (d,  $J$  = 8.9 Hz, 1H), 7.54 – 7.49 (m, 3H), 7.41 (s, 1H).  **$^{13}C$  NMR (125 MHz,  $CDCl_3$ )**  $\delta$  162.4, 156.8, 152.3, 151.4, 138.6, 135.2, 131.7, 130.8, 130.3, 129.6, 129.1, 128.6, 128.4, 128.2, 127.7, 125.8, 125.6, 125.6, 115.6, 104.3 **IR ( $cm^{-1}$ )**  $\nu$  3048, 2958, 2907, 1734, 1627, 1584, 1498, 1397, 1348, 1225, 1161, 1066. **MS (EI, 70 eV)**  $m/z$   $[M]^+$  found for  $C_{22}H_{13}NO_2$ : 323. **Anal. Calcd** for  $C_{22}H_{13}NO_2$ : C, 81.72; H, 4.05; N, 4.33; Found: C, 81.89; H, 4.14; N, 4.51.

### 3-(4-(tert-butyl)phenyl)-8-isopropyl-1H-pyrano[4,3-b]quinolin-1-one (2j)

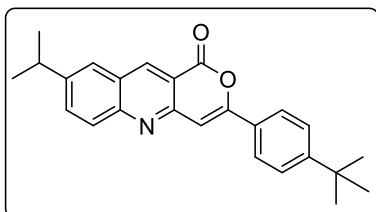

Yellow solid; Yield 79% (117mg); m.p. 154-157°C;  $R_f$  = 0.225 on silica gel (Hexane/EtOAc 5:1);  **$^1H$  NMR (500 MHz,  $CDCl_3$ )**  $\delta$  1.36 (s, 15H), 3.12 (hept,  $J$  = 7.0 Hz, 1H), 7.29 (s, 1H), 7.51 (d,  $J$  = 8.5 Hz, 2H), 7.75 (s, 1H), 7.79 (d,  $J$  = 8.9 Hz, 1H), 7.88 (d,  $J$  = 8.5 Hz, 2H), 8.05 (d,  $J$  = 8.8 Hz, 1H), 9.07 (s, 1H).  **$^{13}C$  NMR (125 MHz,  $CDCl_3$ )**  $\delta$  162.3, 156.9, 154.4, 152.1, 150.6, 147.9, 140.2, 134.0, 128.8, 128.7, 127.2, 126.1, 125.6, 125.4, 115.6, 103.0, 35.1, 34.1, 31.3, 23.7 **IR ( $cm^{-1}$ )**  $\nu$  3083, 2957, 2871, 1731, 1629, 1590, 1466, 1374, 1269, 1198, 1115, 1057, 1018. **MS (EI, 70 eV)**  $m/z$   $[M]^+$  found for  $C_{25}H_{25}NO_2$ : 371. **Anal. Calcd** for  $C_{25}H_{25}NO_2$ : C, 80.83; H, 6.78; N, 3.77; Found: C, 80.92; H, 6.87; N, 3.98.

### 3-butyl-8-methoxy-1H-pyrano[4,3-b]quinolin-1-one (2k)

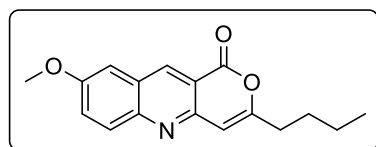

Yellow solid; Yield 62% (70mg); m.p. 157-160°C;  $R_f$  = 0.27 on silica gel (Hexane/EtOAc 5:1);  **$^1H$  NMR (500 MHz,  $CDCl_3$ )**  $\delta$  0.97(t,  $J$  = 7.4 Hz, 3H), 1.39 – 1.50 (m, 2H), 1.74(p,  $J$  = 7.5 Hz, 2H), 2.61(t,  $J$  = 7.6 Hz, 2H), 3.97(s, 3H), 6.61(s, 1H), 7.18(d,  $J$  = 2.8 Hz, 1H), 7.54(dd,  $J$  = 9.3, 2.8 Hz, 1H), 8.01(d,  $J$  = 9.3 Hz, 1H), 8.99(s, 1H).  **$^{13}C$  NMR (125 MHz,  $CDCl_3$ )**  $\delta$  158.2, 156.8, 150.6, 130.1, 128.1, 127.4, 127.4, 120.1, 115.6, 105.9, 104.9, 55.9, 33.6, 28.8, 22.2, 13.9. **IR ( $cm^{-1}$ )**  $\nu$  2950, 2871, 1733, 1653, 1589, 1489, 1427, 1380, 1222, 1180, 1108, 1021. **MS (EI, 70 eV)**  $m/z$   $[M]^+$  found for  $C_{17}H_{17}NO_3$ : 283. **Anal. Calcd** for  $C_{17}H_{17}NO_3$ : C, 72.07; H, 6.05; N, 4.94; Found: 71.80; H, 5.93; N, 4.80.

### 7-phenyl-5H-pyrano [4,3-b]pyridin-5-one (2l)

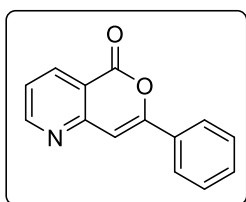

Pale yellow solid; yield 87% (78mg); m.p. 137-139°C;  $R_f$  = 0.13 on silica gel (Hexane/EtOAc 5:1);  **$^1H$  NMR (500 MHz,  $CDCl_3$ )**  $\delta$  7.22 (s, 1H), 7.41 (dd,  $J$  = 8.0, 4.7 Hz, 1H), 7.48(dd,  $J$  = 5.4, 2.2 Hz, 3H), 7.89 – 7.93 (m, 2H), 8.53(d,  $J$  = 8.0, 1H), 8.92 (d,  $J$  = 4.4 Hz, 1H)  **$^{13}C$  NMR (125 MHz,  $CDCl_3$ )**  $\delta$  162.1, 157.4, 156.5, 155.1, 137.7, 131.4, 130.9, 129.1, 125.8, 123.0, 117.1, 103.8 **IR ( $cm^{-1}$ )**  $\nu$  3067, 2919, 1787, 1721, 1617, 1557, 1430, 1280, 1223,



1070, 1037. **MS (EI, 70 eV)**  $m/z$   $[M]^+$  found for  $C_{14}H_9NO_2$ : 223. **Anal. Calcd** for  $C_{14}H_9NO_2$ : C, 75.33; H, 4.06; N, 6.27; Found: C, 75.12; H, 3.97; N, 6.02.

### 7-nitro-3-phenyl-1H-isochromen-1-one (2m)

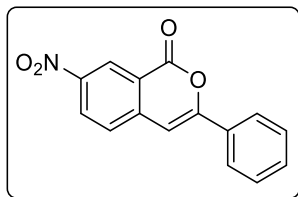

Yellow solid; Yield 73% (78mg); m.p. 196-200°C;  $R_f$  = 0.44 on silica gel (Hexane/EtOAc 5:1);  **$^1H$  NMR (500 MHz,  $CDCl_3$ )**  $\delta$  7.05 (s, 1H), 7.48 – 7.54 (m, 3H), 7.66 (d,  $J$  = 8.6 Hz, 1H), 7.90 – 7.95 (m, 2H), 8.52 (dd,  $J$  = 8.6, 2.4 Hz, 1H), 9.15 (d,  $J$  = 2.1 Hz, 1H).  **$^{13}C$  NMR (125 MHz,  $CDCl_3$ )**  $\delta$  157.3, 142.7, 131.4, 131.1, 130.3, 129.3, 129.2, 128.6, 127.4, 126.0, 125.9, 120.9, 100.8. **IR ( $cm^{-1}$ )**  $\nu$  2918, 2854, 1716, 1619, 1519,

1458, 1337, 1254, 1088, 1027. **MS (EI, 70 eV)**  $m/z$   $[M]^+$  found for  $C_{15}H_9NO_4$ : 267. **Anal. Calcd** for  $C_{15}H_9NO_4$ : C, 67.42; H, 3.39; N, 5.24; Found: C, 67.80; H, 3.54; N, 5.40.

### 3-phenyl-1H-isochromen-1-one (2n)

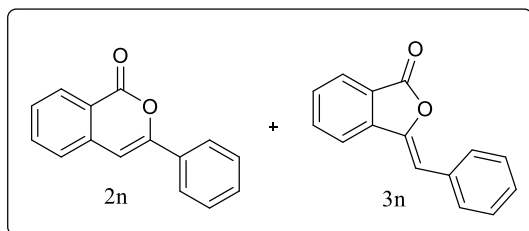

The compounds exist as a 22:3 mixture of 2n and 3n. Yellow solid; Yield 78% (69mg);  $R_f$  = 0.52 on silica gel (Hexane/EtOAc 5:1).  **$^1H$  NMR (500 MHz,  $CDCl_3$ )**  $\delta$  8.32 (d,  $J$  = 8.1 Hz, 1H), 7.89 (d,  $J$  = 7.0 Hz, 2H), 7.73 (dd,  $J$  = 7.6, 1.3 Hz, 1H), 7.42 – 7.52 (m, 6H), 6.96 (s, 1H).  **$^{13}C$  NMR (125 MHz,  $CDCl_3$ )**  $\delta$  162.4, 153.8, 137.7, 135.0, 132.1, 130.3, 130.1, 129.8,

129.0, 128.9, 128.3, 126.1, 125.4, 120.7, 102.0. **IR ( $cm^{-1}$ )**  $\nu$  3057, 2957, 1771, 1719, 1635, 1480, 1268, 1072. **MS (EI, 70 eV)**  $m/z$   $[M]^+$  found for  $C_{15}H_{10}O_2$ : 222. **Anal. Calcd** for  $C_{15}H_{10}O_2$ : C, 81.07; H, 4.54; Found: C, 81.49; H, 4.71.

### 3-(4-(tert-butyl) phenyl)-1H-isochromen-1-one (2o)

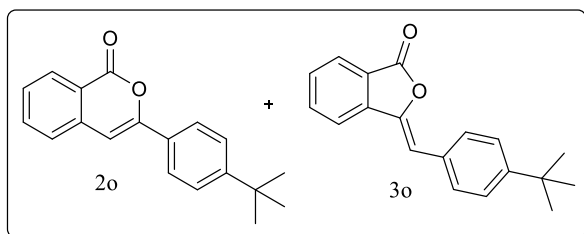

The compounds exist as a 23:2 mixture of 2o and 3o. Yellow oil; Yield 70% (78mg);  $R_f$  = 0.5 on silica gel (Hexane/EtOAc 5:1);  **$^1H$  NMR (500 MHz,  $CDCl_3$ )**  $\delta$  1.36 (s, 9H), 6.91 (s, 1H), 7.43 – 7.52 (m, 4H), 7.70 (t,  $J$  = 8.2 Hz, 1H), 7.82 (d,  $J$  = 8.5 Hz, 2H), 8.30 (d,  $J$  = 8.1 Hz, 1H).  **$^{13}C$  NMR (125 MHz,  $CDCl_3$ )**  $\delta$  162.5, 153.9, 153.5, 137.8,

134.9, 129.8, 129.7, 129.3, 128.0, 125.9, 125.2, 120.6, 101.3, 35.0, 29.8. **IR ( $cm^{-1}$ )**  $\nu$  2918, 2856, 1734, 1634, 1463, 1371, 1231, 1064, 1017. **MS (EI, 70 eV)**  $m/z$   $[M]^+$  found for  $C_{19}H_{18}O_2$ : 278. **Anal. Calcd** for  $C_{19}H_{18}O_2$ : C, 81.99; H, 6.52; Found: C, 82.34; H, 6.66.

### 3-(4-methoxyphenyl)-1H-isochromen-1-one (2p)

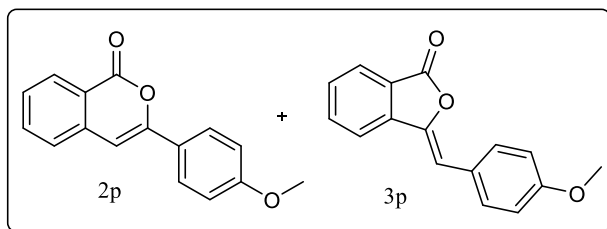

The compounds exist as a 19:1 mixture of 2p and 3p. Red solid; Yield 76% (76mg);  $R_f$  = 0.3 on silica gel (Hexane/EtOAc 5:1);  **$^1H$  NMR (500 MHz,  $CDCl_3$ )**  $\delta$  3.85 (s, 3H), 6.8 (s, 1H), 6.95 (d,  $J$  = 8.2 Hz, 2H), 7.40 – 7.48 (m, 2H), 7.67 (t,  $J$  = 7.6 Hz, 1H), 7.80 (d,  $J$  = 8.1 Hz, 2H), 8.27 (d,  $J$  = 8.1 Hz, 1H).  **$^{13}C$  NMR (125 MHz,**

$\text{CDCl}_3$ )  $\delta$  162.6, 161.2, 153.8, 138.0, 134.9, 131.8, 129.7, 127.7, 126.9, 125.8, 124.6, 120.2, 114.3, 100.3, 55.5 **IR** ( $\text{cm}^{-1}$ )  $\nu$  3063, 1780, 1719, 1487, 1247, 1070, 1005. **MS (EI, 70 eV)**  $m/z$   $[M]^+$  found for  $\text{C}_{16}\text{H}_{12}\text{O}_3$ : 252. **Anal. Calcd** for  $\text{C}_{16}\text{H}_{12}\text{O}_3$ : C, 76.18; H, 4.79; Found: C, 76.44; H, 4.90.

## D2. Characterization Data of compound 2q

### 4-bromo-8-methoxy-3-phenyl-1H-pyrano[4,3-b]quinolin-1-one (2q)

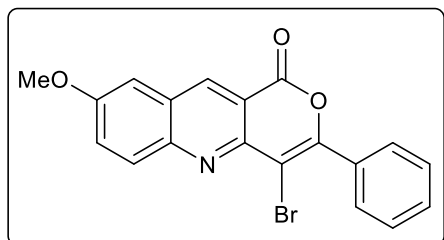

Yellow solid; Yield 77% (93mg); m.p. 239-241°C;  $R_f$  = 0.3 on silica gel (Hexane/EtOAc 5:1);  **$^1\text{H}$  NMR (500 MHz,  $\text{CDCl}_3$ )**  $\delta$  4.04 (s, 3H), 7.30 (dt,  $J$  = 9.0, 2.5 Hz, 1H), 7.50 – 7.55 (m,  $J$  = 4.3, 3.5 Hz, 2H), 7.55 – 7.59 (dd,  $J$  = 6.9, 2.4 Hz, 1H), 7.90 (d,  $J$  = 8.9 Hz, 3H), 7.94 – 7.99 (m, 1H), 9.05 (d,  $J$  = 7.7 Hz, 1H).  **$^{13}\text{C}$  NMR (125 MHz,  $\text{CDCl}_3$ )**  $\delta$  56.2, 107.3, 122.2, 123.0, 128.3, 128.4, 129.6, 129.9, 130.5, 130.6, 130.7, 130.8, 132.9, 140.2, 140.3, 154.0, 161.4, 164.5 **IR** ( $\text{cm}^{-1}$ )  $\nu$  2931, 1744, 1593, 1486, 1373, 1242, 1159, 1022. **MS (EI, 70 eV)**  $m/z$   $[M]^+$  found for  $\text{C}_{19}\text{H}_{12}\text{BrNO}_3$ : 381. **Anal. Calcd** for  $\text{C}_{19}\text{H}_{12}\text{BrNO}_3$ : C, 59.71; H, 3.16; Found: C, 59.86; H, 3.24.

## E. X-ray crystallographic data of compound (2a)

Crystallographic data for the structure in this paper have been deposited with the Cambridge Crystallographic Data Centre, CCDC, 12 Union Road, Cambridge CB21EZ, UK. Copies of the

data can be obtained free of charge on quoting the depository numbers CCDC-2051315 (Fax: +44-1223-336-033; E-Mail: deposit@ccdc.cam.ac.uk, [www.ccdc.cam.ac.uk](http://www.ccdc.cam.ac.uk) )

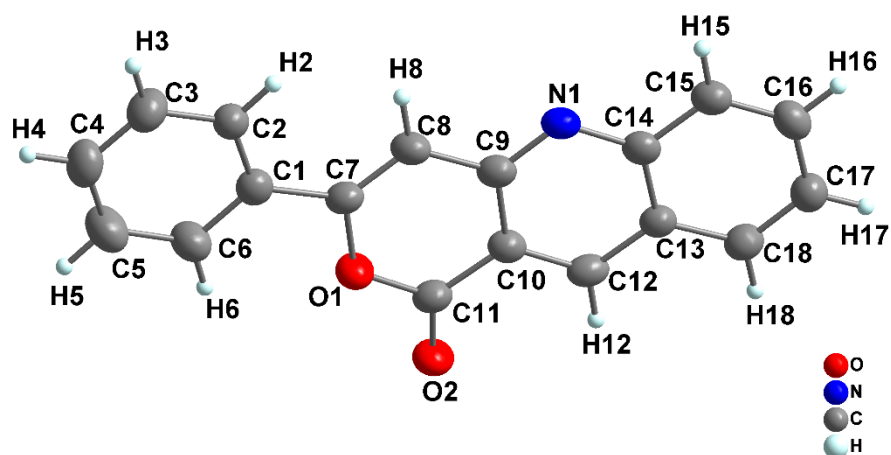

**Figure 1.** a view of the asymmetric unit of 3-phenyl-1H-pyrano[4,3-b]quinolin-1-one with the labelling scheme, showing displacement ellipsoids at the 50% probability level.

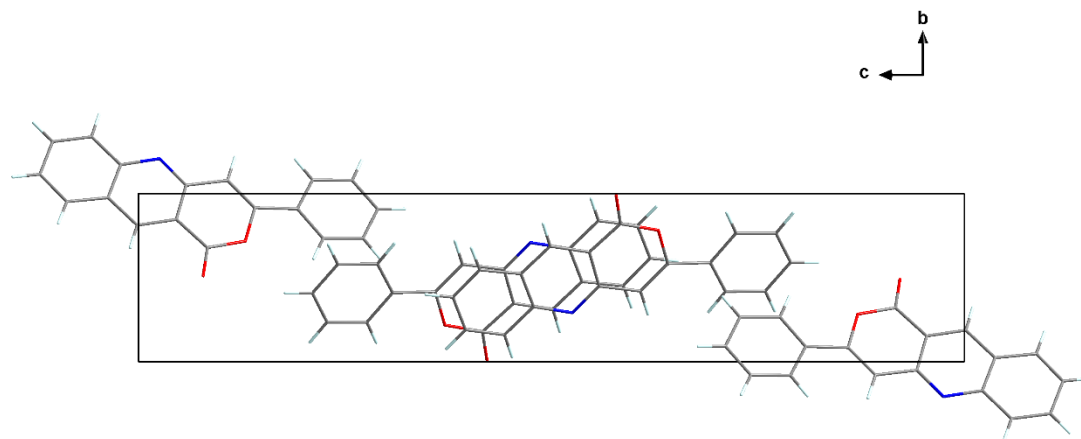

**Figure 2.** Packing diagram looking along the crystallographic *a* axis of 3-phenyl-1H-pyrano[4,3-b]quinolin-1-one, Color legend: O (red), N (blue), C (gray).

Table 1. Crystal data and structure refinement for 3-phenyl-1H-pyrano[4,3-b]quinolin-1-one.

|                     |                                                 |
|---------------------|-------------------------------------------------|
| Identification code | 865                                             |
| Empirical formula   | C <sub>18</sub> H <sub>11</sub> NO <sub>2</sub> |
| Formula weight      | 273.28                                          |

|                                   |                                             |                |
|-----------------------------------|---------------------------------------------|----------------|
| Temperature                       | 223(2) K                                    |                |
| Wavelength                        | 0.71073 Å                                   |                |
| Crystal system                    | Monoclinic                                  |                |
| Space group                       | P2 <sub>1</sub> /n                          |                |
| Unit cell dimensions              | a = 8.1600(16) Å                            | α = 90°.       |
|                                   | b = 5.6000(11) Å                            | β = 94.00(3)°. |
|                                   | c = 27.700(6) Å                             | γ = 90°.       |
| Volume                            | 1262.7(4) Å <sup>3</sup>                    |                |
| Z                                 | 4                                           |                |
| Density (calculated)              | 1.438 Mg/m <sup>3</sup>                     |                |
| Absorption coefficient            | 0.095 mm <sup>-1</sup>                      |                |
| F(000)                            | 568                                         |                |
| Crystal size                      | 0.200 x 0.150 x 0.100 mm <sup>3</sup>       |                |
| Theta range for data collection   | 2.559 to 27.048°.                           |                |
| Index ranges                      | -10 ≤ h ≤ 10, -7 ≤ k ≤ 7, -34 ≤ l ≤ 33      |                |
| Reflections collected             | 11016                                       |                |
| Independent reflections           | 2697 [R(int) = 0.0836]                      |                |
| Completeness to theta = 25.242°   | 99.8 %                                      |                |
| Absorption correction             | None                                        |                |
| Refinement method                 | Full-matrix least-squares on F <sup>2</sup> |                |
| Data / restraints / parameters    | 2697 / 0 / 190                              |                |
| Goodness-of-fit on F <sup>2</sup> | 1.331                                       |                |
| Final R indices [I > 2σ(I)]       | R1 = 0.0928, wR2 = 0.1455                   |                |
| R indices (all data)              | R1 = 0.1256, wR2 = 0.1550                   |                |
| Extinction coefficient            | n/a                                         |                |
| Largest diff. peak and hole       | 0.225 and -0.249 e.Å <sup>-3</sup>          |                |

Table 2. Bond lengths [Å] and angles [°] for 3-phenyl-1H-pyrano[4,3-b]quinolin-1-one.

---

**Bond lengths**

|             |          |
|-------------|----------|
| O(1)-C(7)   | 1.385(4) |
| O(1)-C(11)  | 1.387(4) |
| O(2)-C(11)  | 1.191(4) |
| N(1)-C(9)   | 1.313(4) |
| N(1)-C(14)  | 1.369(4) |
| C(1)-C(6)   | 1.381(4) |
| C(1)-C(2)   | 1.390(4) |
| C(1)-C(7)   | 1.488(4) |
| C(2)-C(3)   | 1.383(5) |
| C(2)-H(2)   | 0.9400   |
| C(3)-C(4)   | 1.365(5) |
| C(3)-H(3)   | 0.9400   |
| C(4)-C(5)   | 1.367(5) |
| C(4)-H(4)   | 0.9400   |
| C(5)-C(6)   | 1.393(5) |
| C(5)-H(5)   | 0.9400   |
| C(6)-H(6)   | 0.9400   |
| C(7)-C(8)   | 1.322(4) |
| C(8)-C(9)   | 1.454(4) |
| C(8)-H(8)   | 0.9400   |
| C(9)-C(10)  | 1.414(4) |
| C(10)-C(12) | 1.379(4) |
| C(10)-C(11) | 1.456(4) |
| C(12)-C(13) | 1.399(4) |
| C(12)-H(12) | 0.9400   |
| C(13)-C(14) | 1.415(4) |
| C(13)-C(18) | 1.429(4) |
| C(14)-C(15) | 1.411(4) |
| C(15)-C(16) | 1.360(4) |
| C(15)-H(15) | 0.9400   |
| C(16)-C(17) | 1.406(5) |
| C(16)-H(16) | 0.9400   |
| C(17)-C(18) | 1.347(4) |

|             |        |
|-------------|--------|
| C(17)-H(17) | 0.9400 |
| C(18)-H(18) | 0.9400 |

**Angles**

|                   |          |
|-------------------|----------|
| C(7)-O(1)-C(11)   | 123.0(2) |
| C(9)-N(1)-C(14)   | 117.6(3) |
| C(6)-C(1)-C(2)    | 117.5(3) |
| C(6)-C(1)-C(7)    | 121.4(3) |
| C(2)-C(1)-C(7)    | 121.0(3) |
| C(3)-C(2)-C(1)    | 121.5(3) |
| C(3)-C(2)-H(2)    | 119.3    |
| C(1)-C(2)-H(2)    | 119.3    |
| C(4)-C(3)-C(2)    | 120.5(4) |
| C(4)-C(3)-H(3)    | 119.8    |
| C(2)-C(3)-H(3)    | 119.8    |
| C(3)-C(4)-C(5)    | 118.8(3) |
| C(3)-C(4)-H(4)    | 120.6    |
| C(5)-C(4)-H(4)    | 120.6    |
| C(4)-C(5)-C(6)    | 121.4(4) |
| C(4)-C(5)-H(5)    | 119.3    |
| C(6)-C(5)-H(5)    | 119.3    |
| C(1)-C(6)-C(5)    | 120.3(3) |
| C(1)-C(6)-H(6)    | 119.9    |
| C(5)-C(6)-H(6)    | 119.9    |
| C(8)-C(7)-O(1)    | 120.8(3) |
| C(8)-C(7)-C(1)    | 128.0(3) |
| O(1)-C(7)-C(1)    | 111.2(3) |
| C(7)-C(8)-C(9)    | 121.5(3) |
| C(7)-C(8)-H(8)    | 119.3    |
| C(9)-C(8)-H(8)    | 119.3    |
| N(1)-C(9)-C(10)   | 123.3(3) |
| N(1)-C(9)-C(8)    | 119.0(3) |
| C(10)-C(9)-C(8)   | 117.6(3) |
| C(12)-C(10)-C(9)  | 119.0(3) |
| C(12)-C(10)-C(11) | 121.0(3) |
| C(9)-C(10)-C(11)  | 120.0(3) |

|                   |          |
|-------------------|----------|
| O(2)-C(11)-O(1)   | 117.6(3) |
| O(2)-C(11)-C(10)  | 125.6(3) |
| O(1)-C(11)-C(10)  | 116.8(3) |
| C(10)-C(12)-C(13) | 119.5(3) |
| C(10)-C(12)-H(12) | 120.2    |
| C(13)-C(12)-H(12) | 120.2    |
| C(12)-C(13)-C(14) | 117.1(3) |
| C(12)-C(13)-C(18) | 122.9(3) |
| C(14)-C(13)-C(18) | 120.0(3) |
| N(1)-C(14)-C(15)  | 118.7(3) |
| N(1)-C(14)-C(13)  | 123.4(3) |
| C(15)-C(14)-C(13) | 117.9(3) |
| C(16)-C(15)-C(14) | 120.4(3) |
| C(16)-C(15)-H(15) | 119.8    |
| C(14)-C(15)-H(15) | 119.8    |
| C(15)-C(16)-C(17) | 121.8(3) |
| C(15)-C(16)-H(16) | 119.1    |
| C(17)-C(16)-H(16) | 119.1    |
| C(18)-C(17)-C(16) | 119.8(3) |
| C(18)-C(17)-H(17) | 120.1    |
| C(16)-C(17)-H(17) | 120.1    |
| C(17)-C(18)-C(13) | 120.2(3) |
| C(17)-C(18)-H(18) | 119.9    |
| C(13)-C(18)-H(18) | 119.9    |

---

## F. Copies of $^1\text{H}$ and $^{13}\text{C}$ NMR Spectra

### F1. $^1\text{H}$ NMR and $^{13}\text{C}$ NMR spectra of final compounds

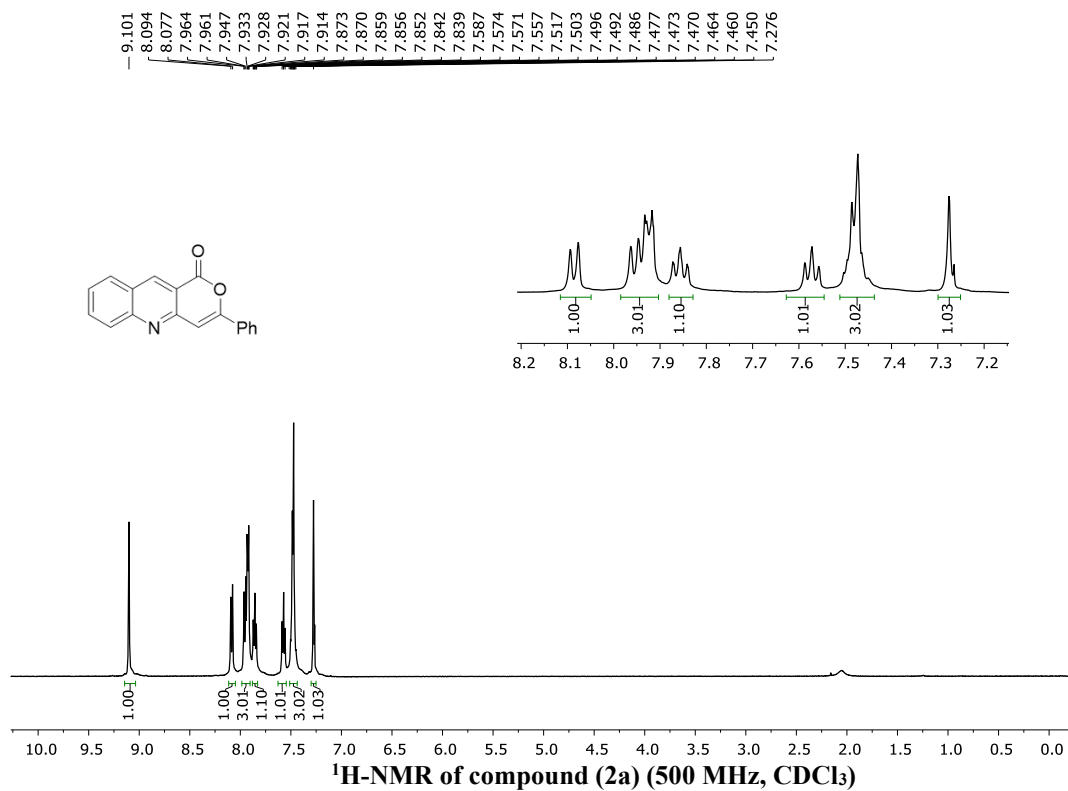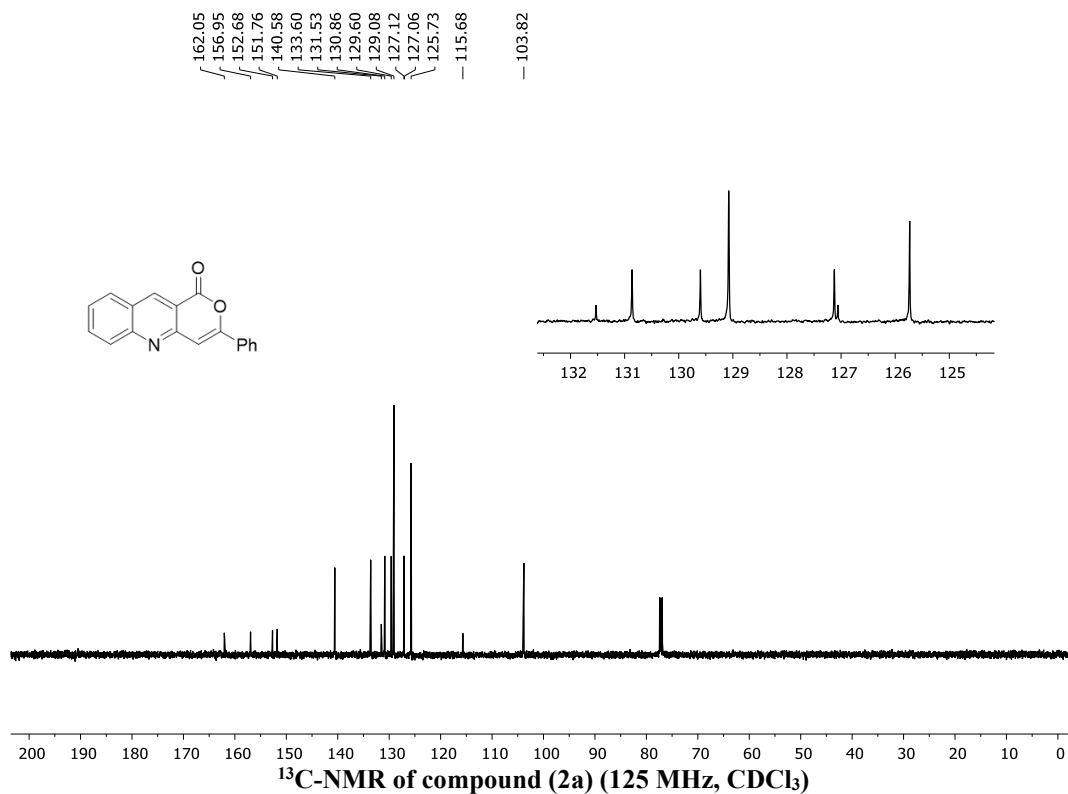



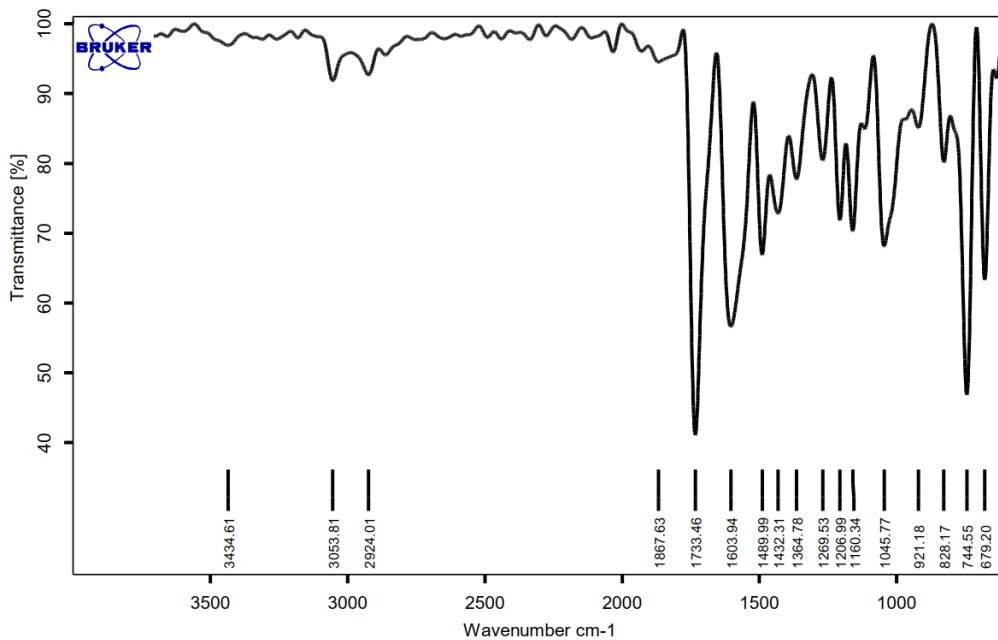

**IR spectrum of compound 2a**

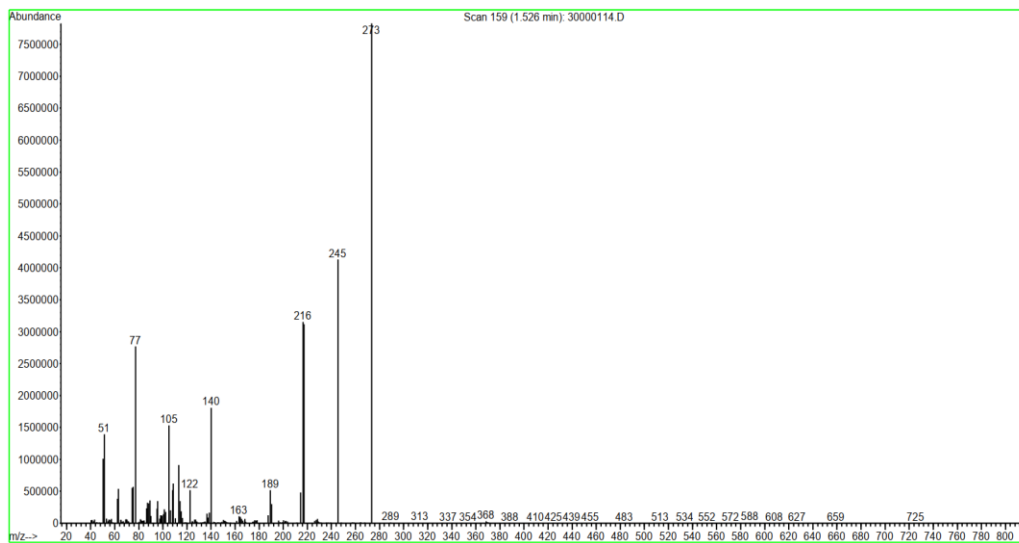

**Mass spectrum of compound 2a with the molecular ion peak at 273**

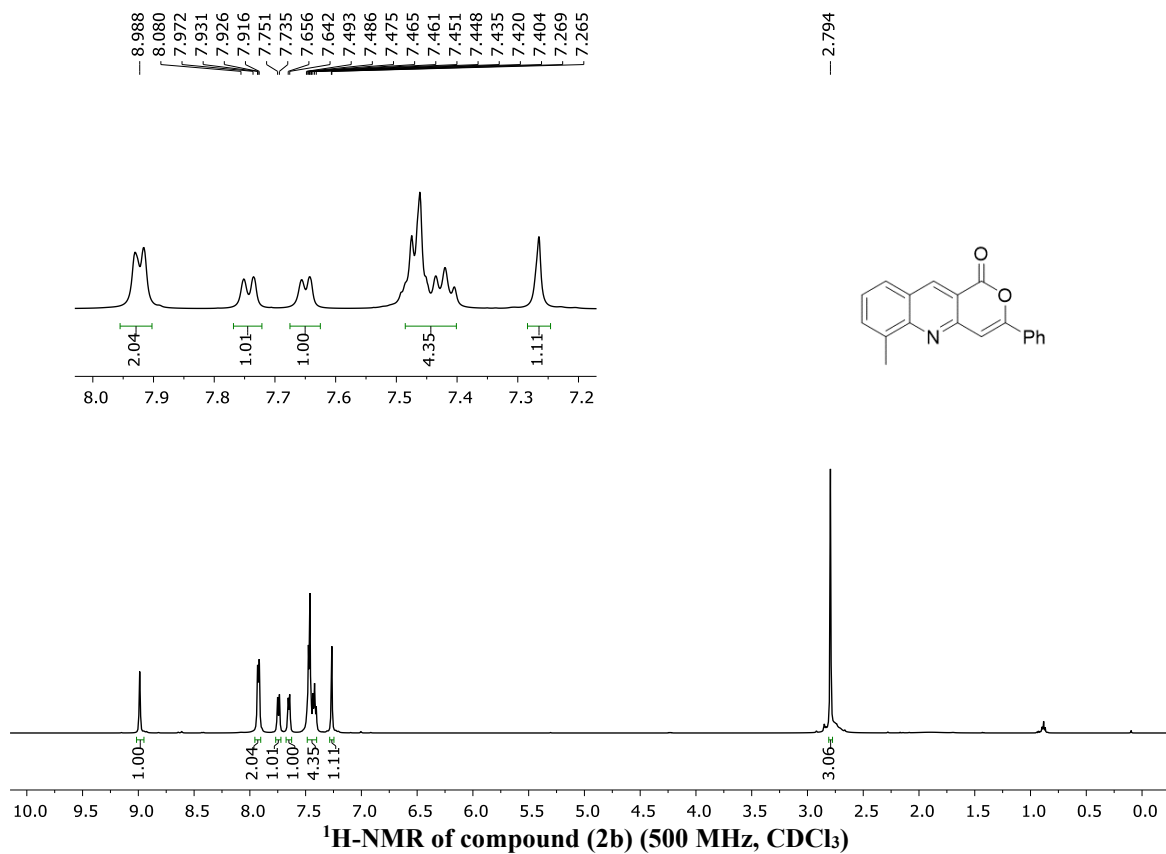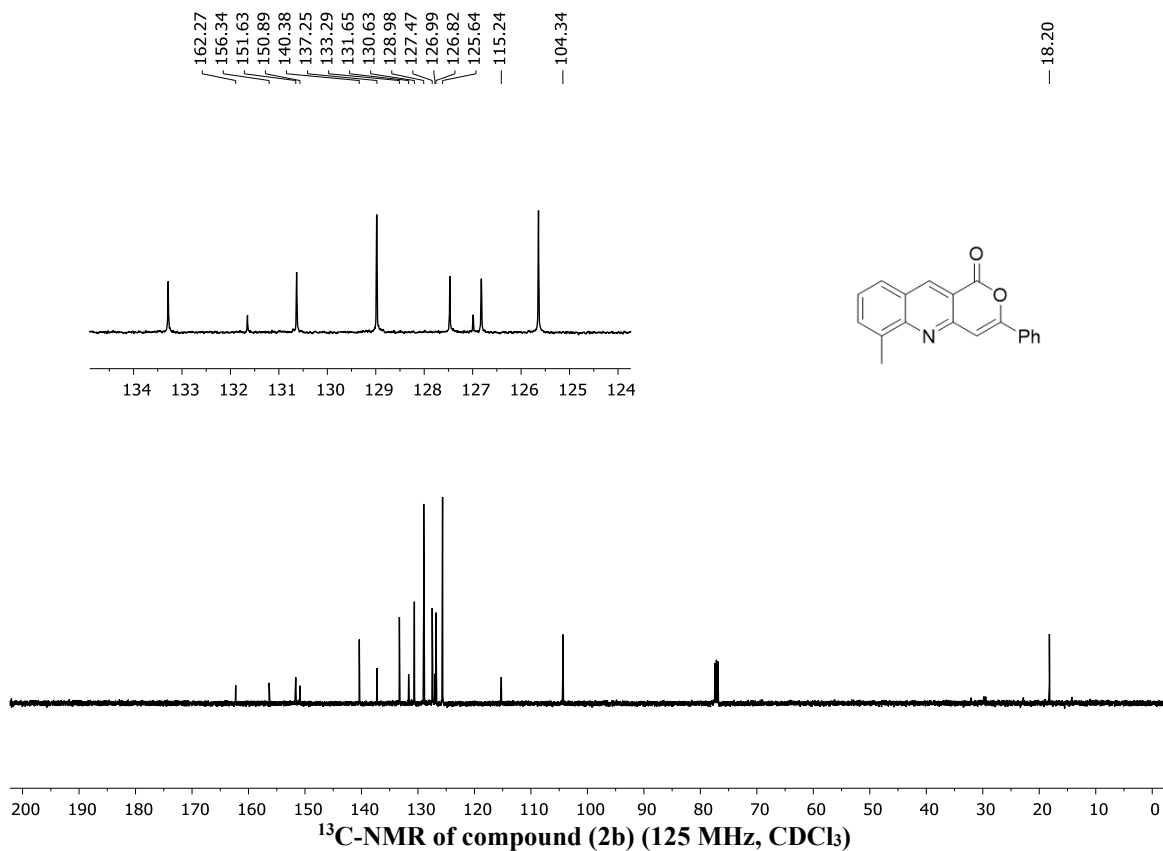

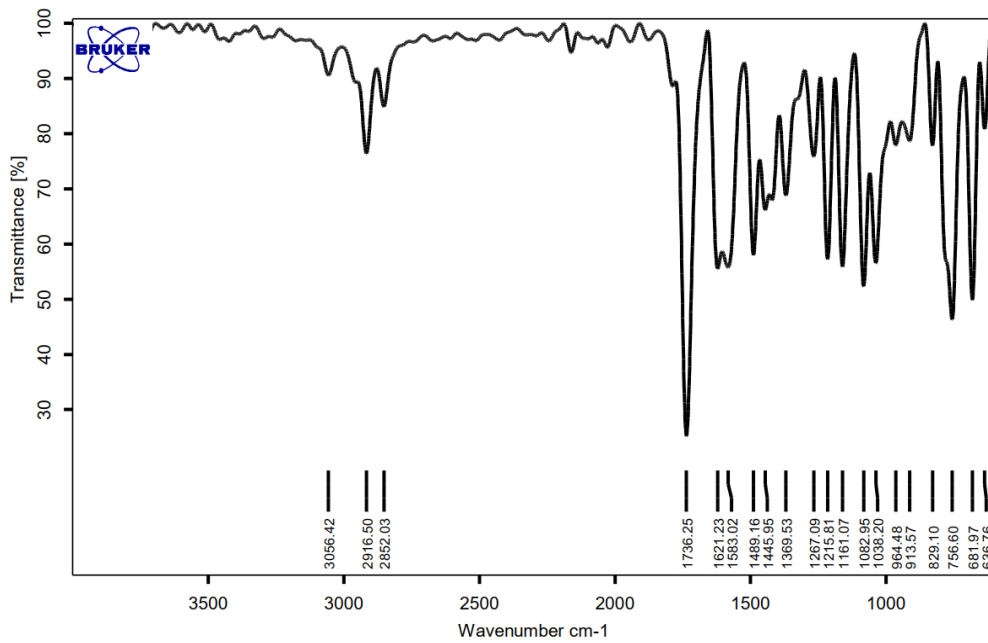

**IR spectrum of compound 2b**

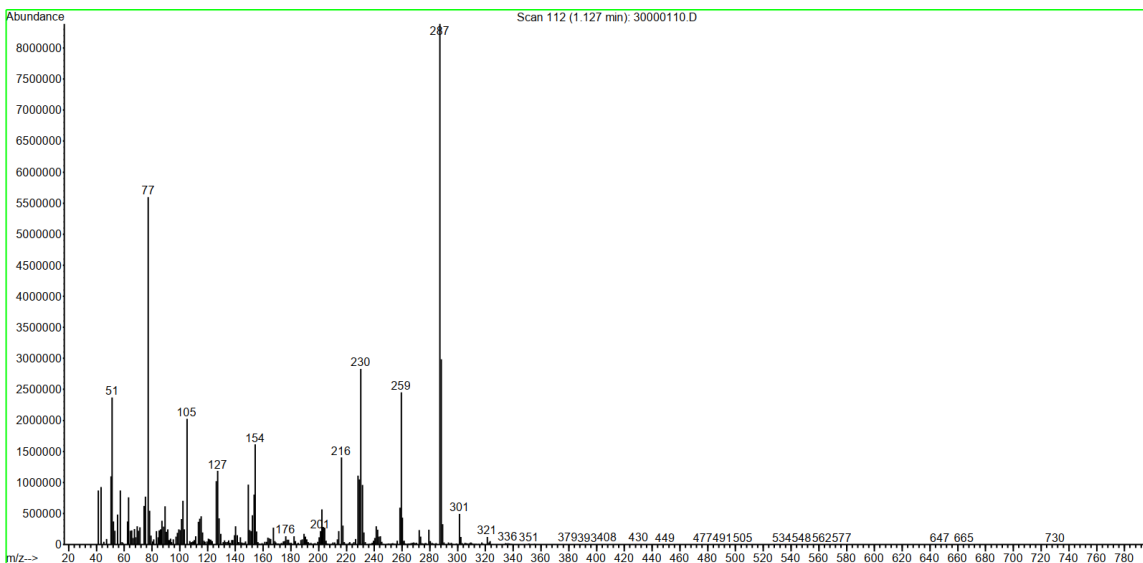

**Mass spectrum of compound 2b with the molecular ion peak at 287**

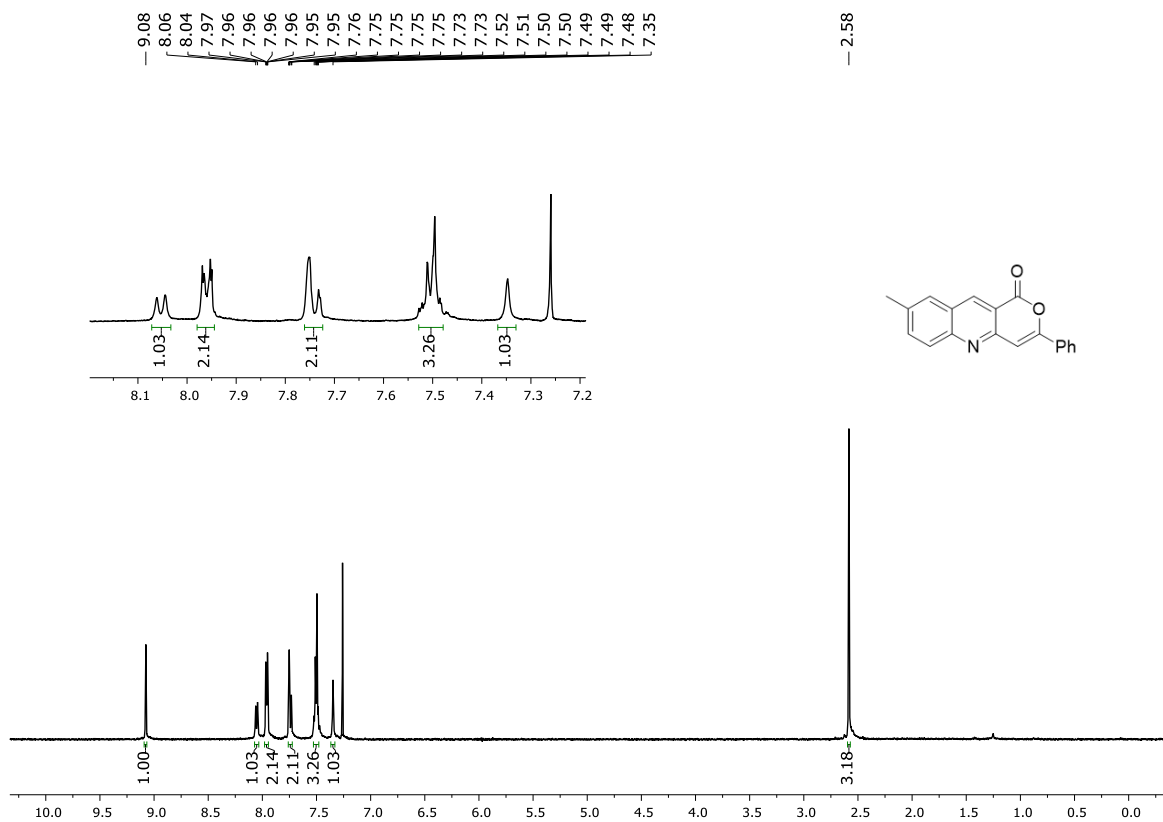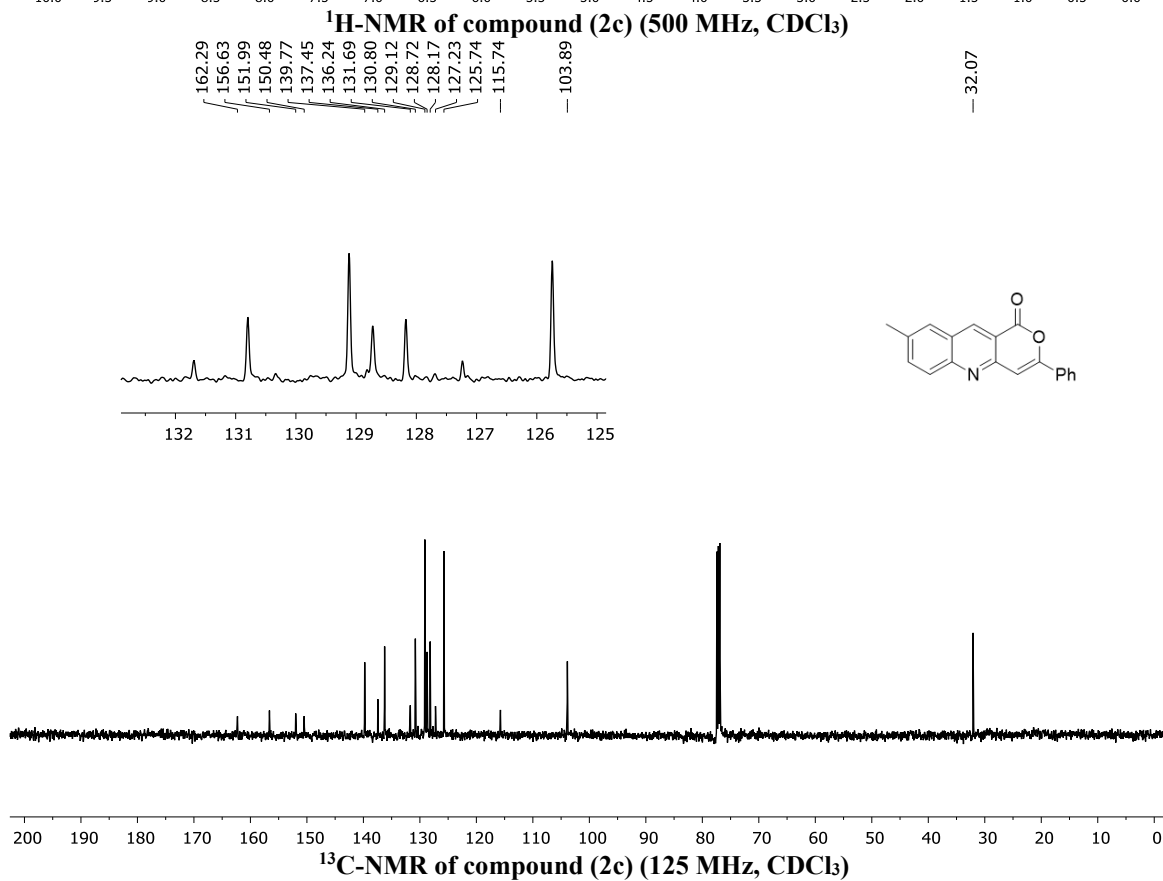

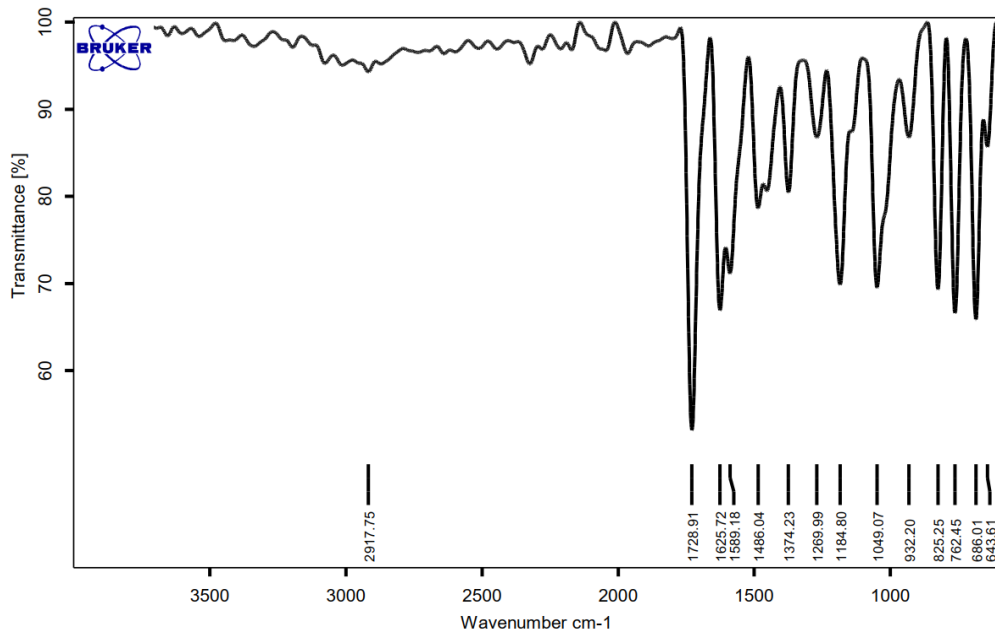

**IR spectrum of compound 2c**

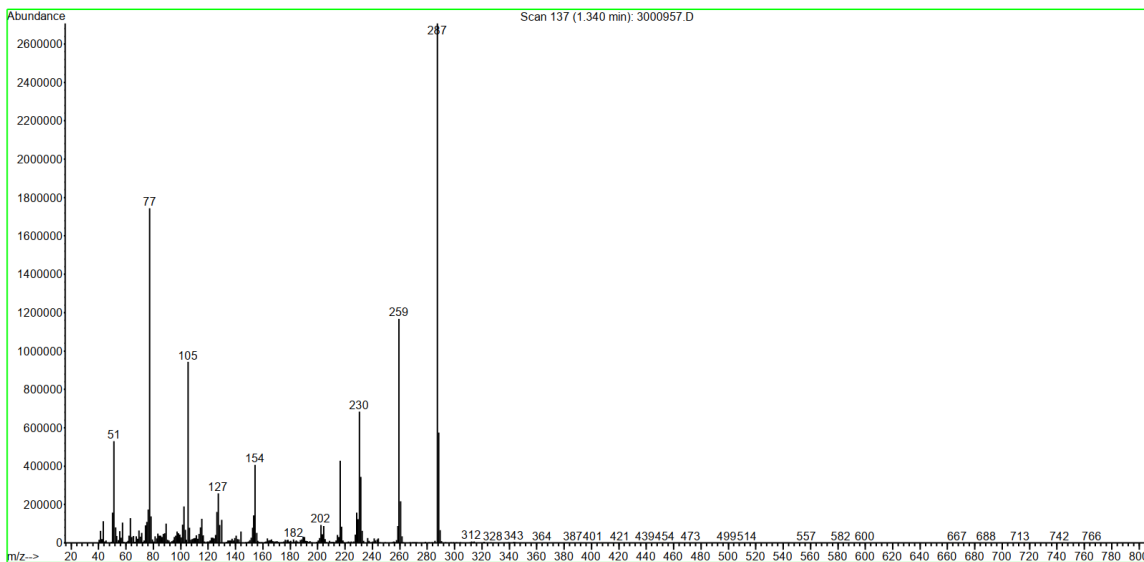

**Mass spectrum of compound 2c with the molecular ion peak at 287**

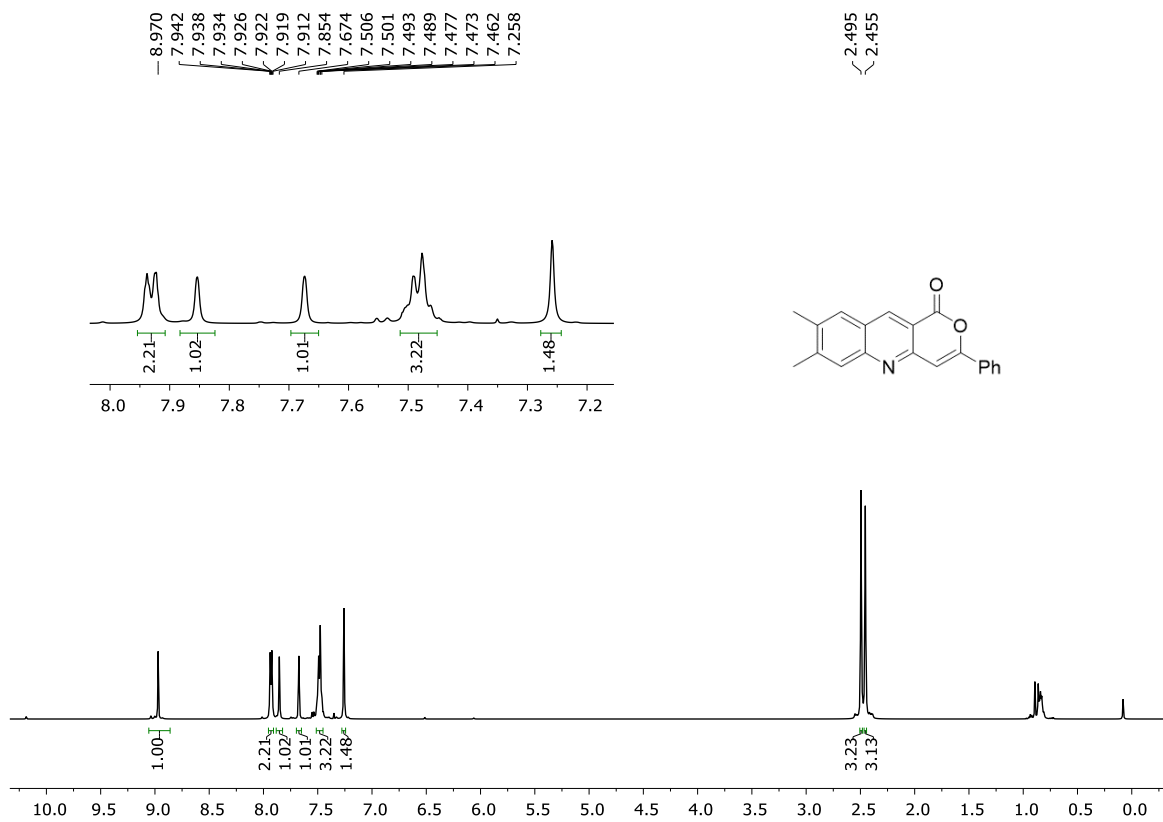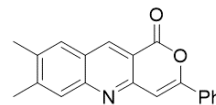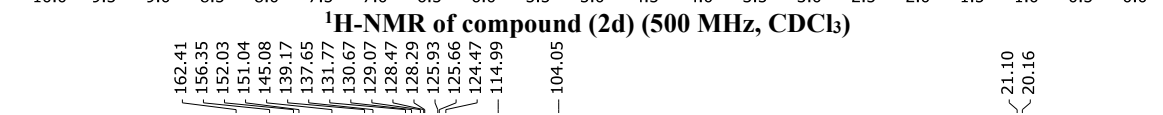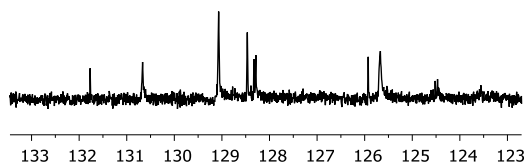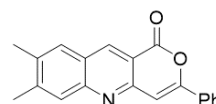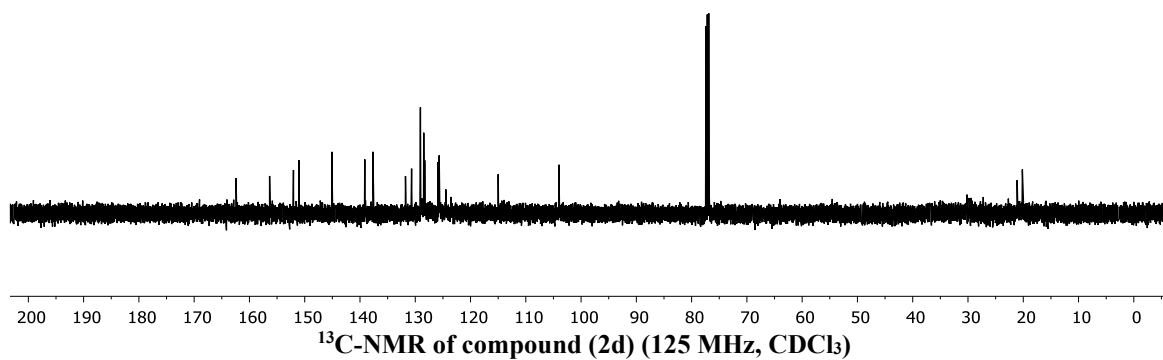

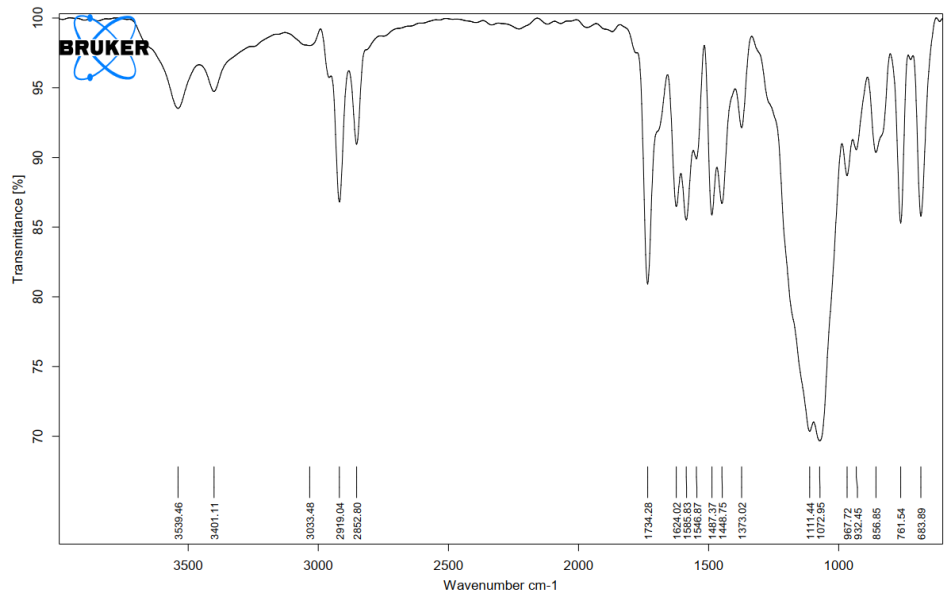

IR spectrum of compound 2d

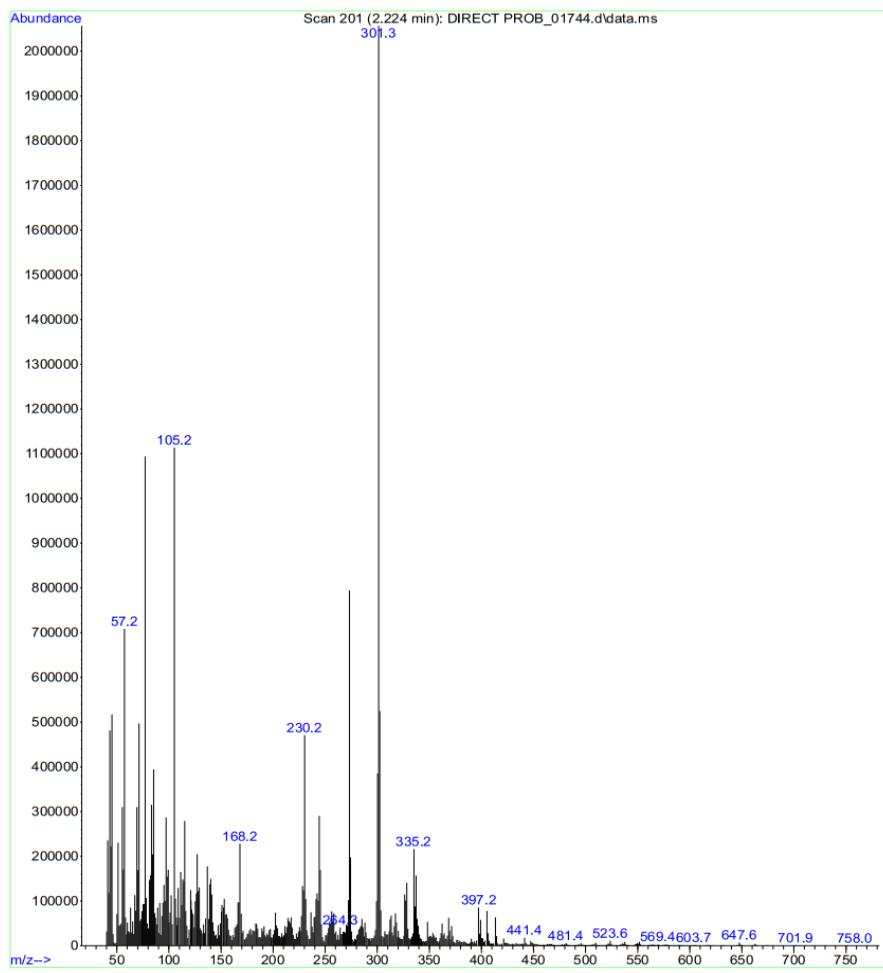

Mass spectrum of compound 2d with the molecular ion peak at 301

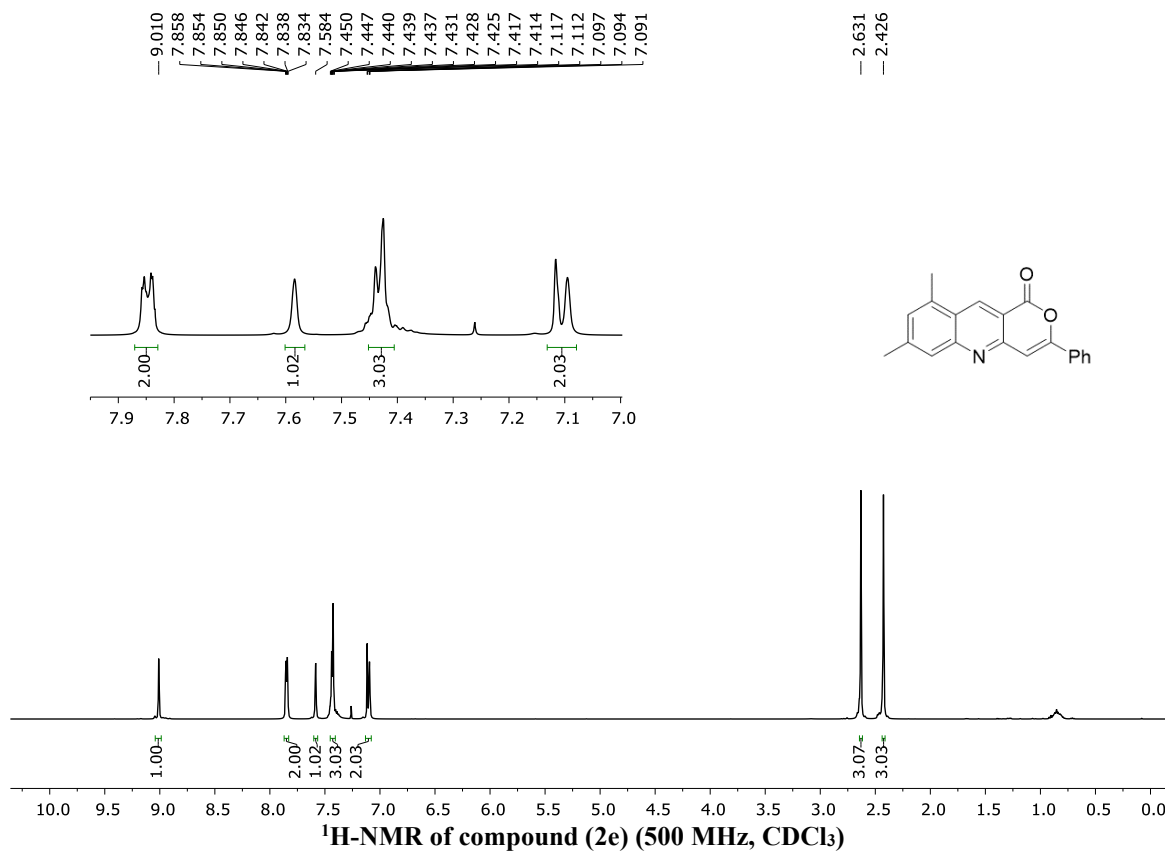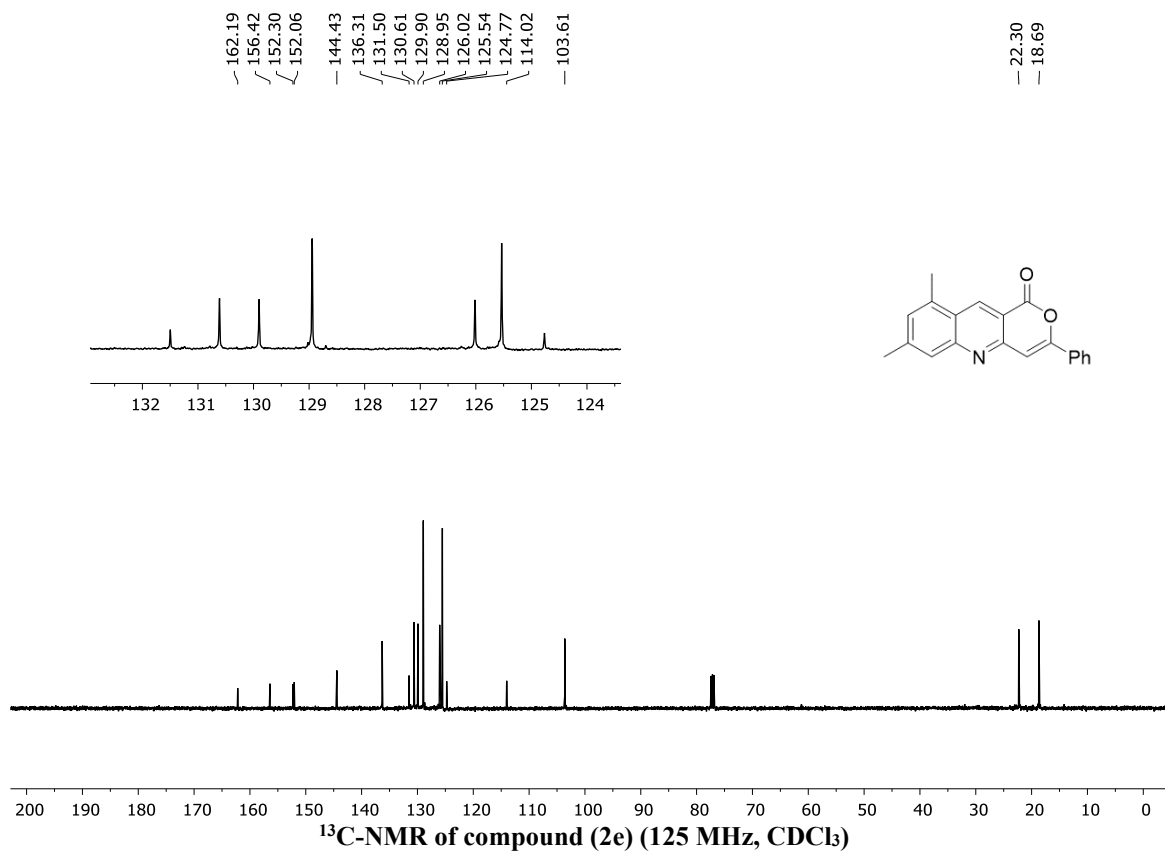



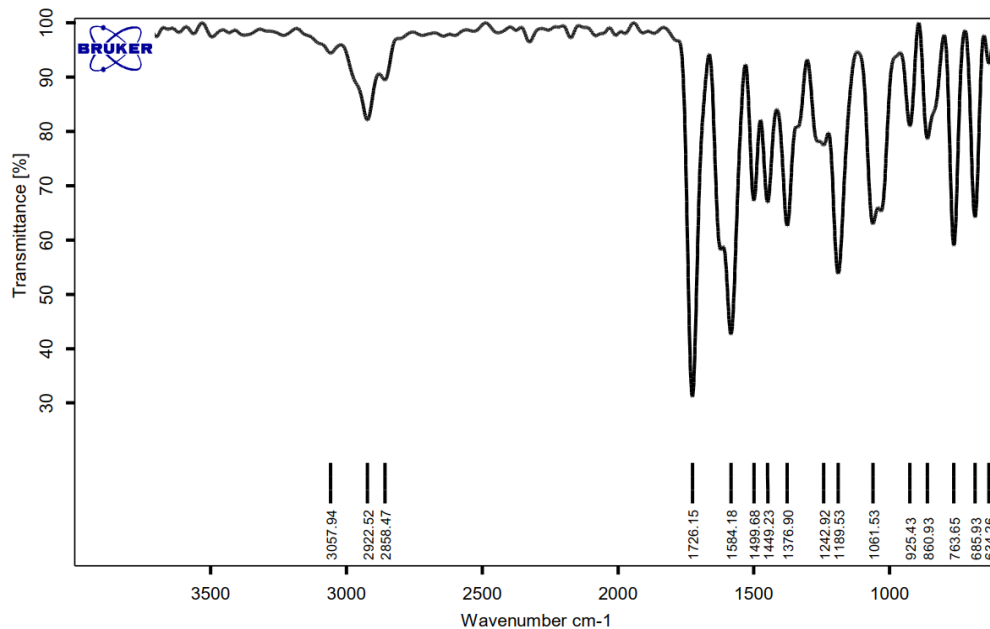

**IR spectrum of compound 2e**

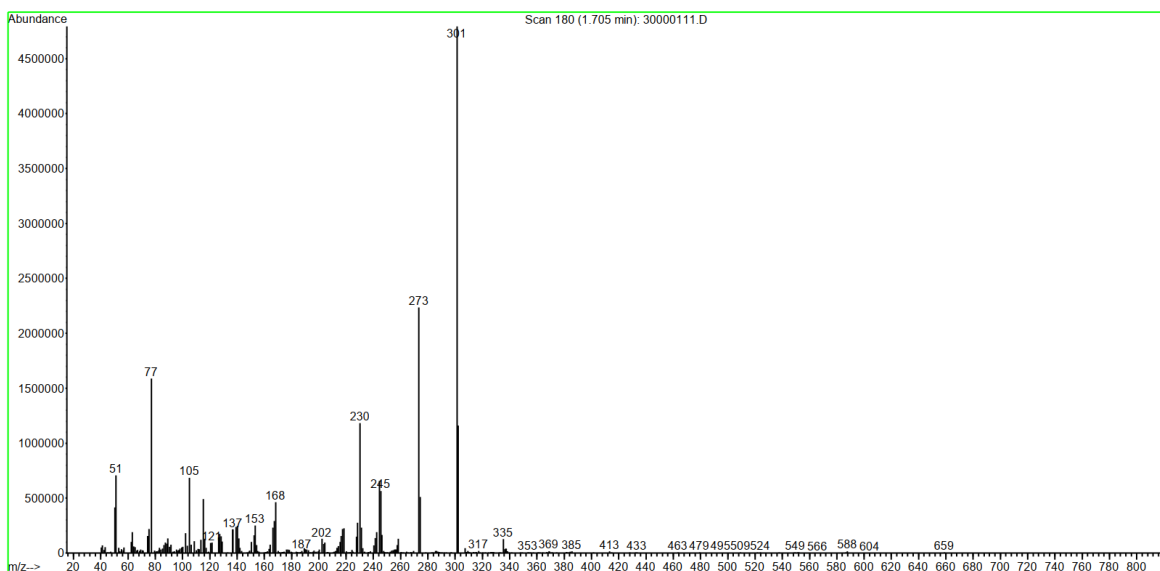

**Mass spectrum of compound 2e with the molecular ion peak at 301**

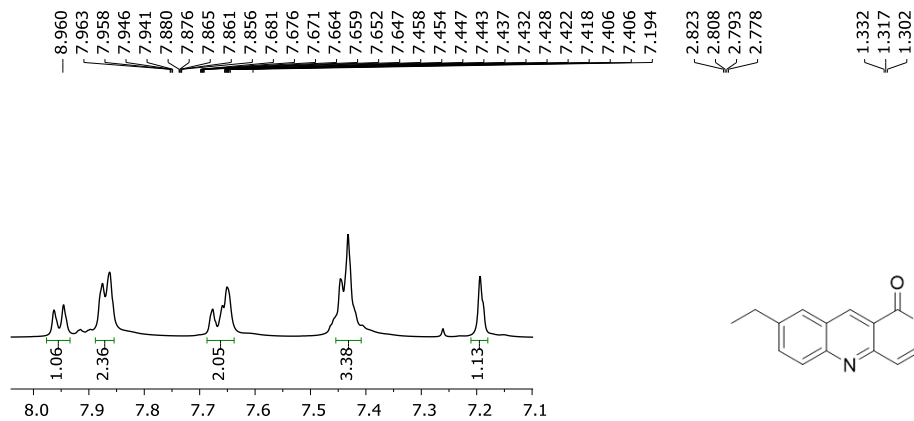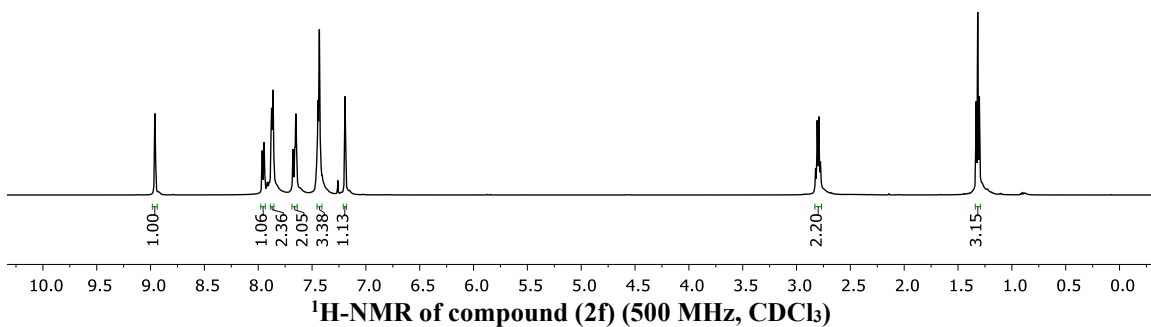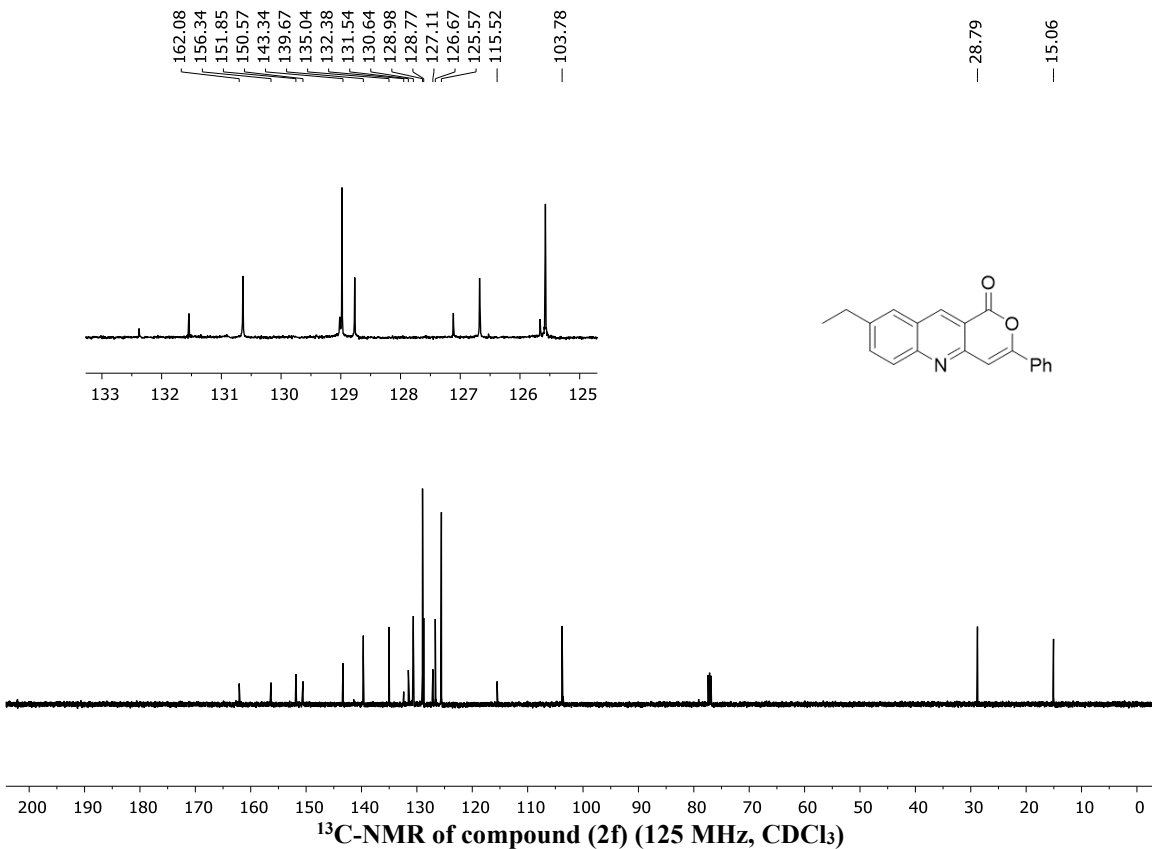

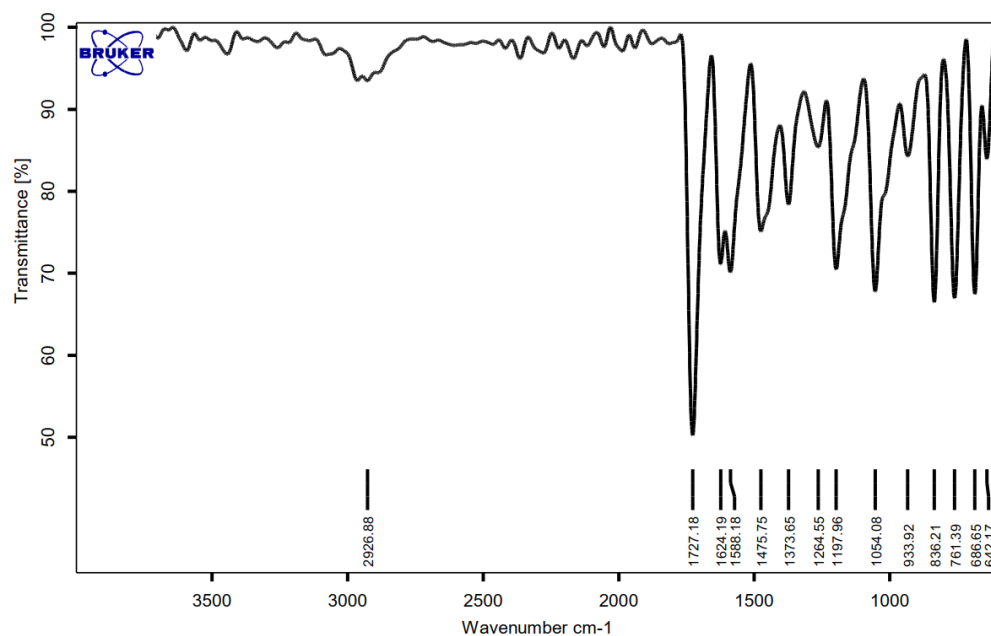

IR spectrum of compound 2f

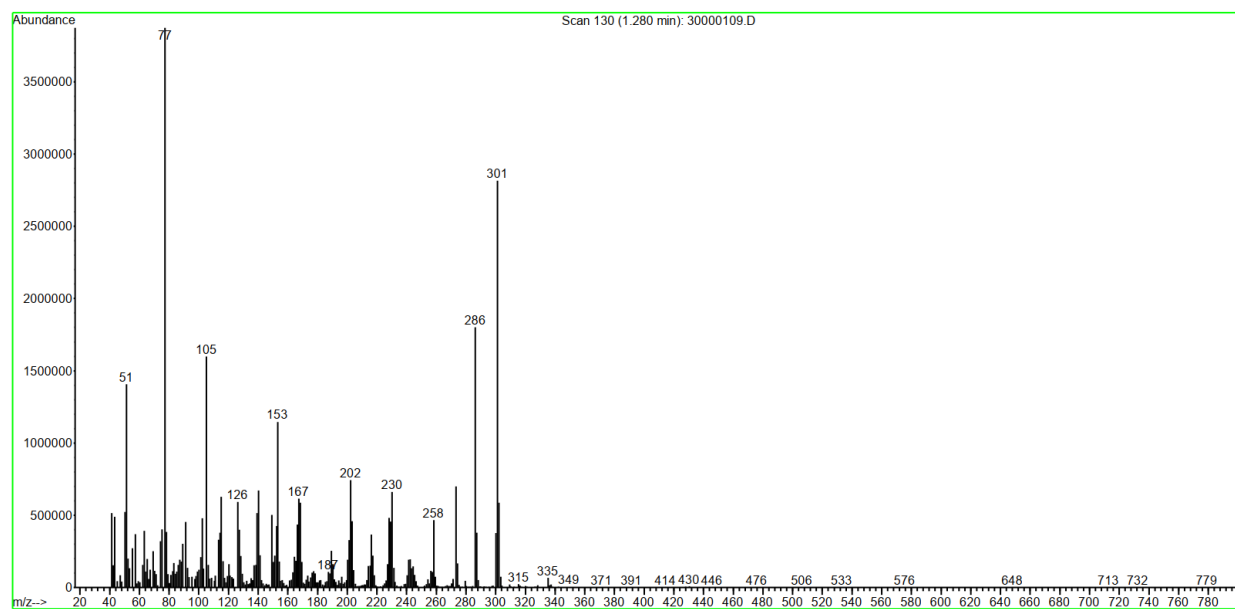

Mass spectrum of compound 2f with the molecular ion peak at 301

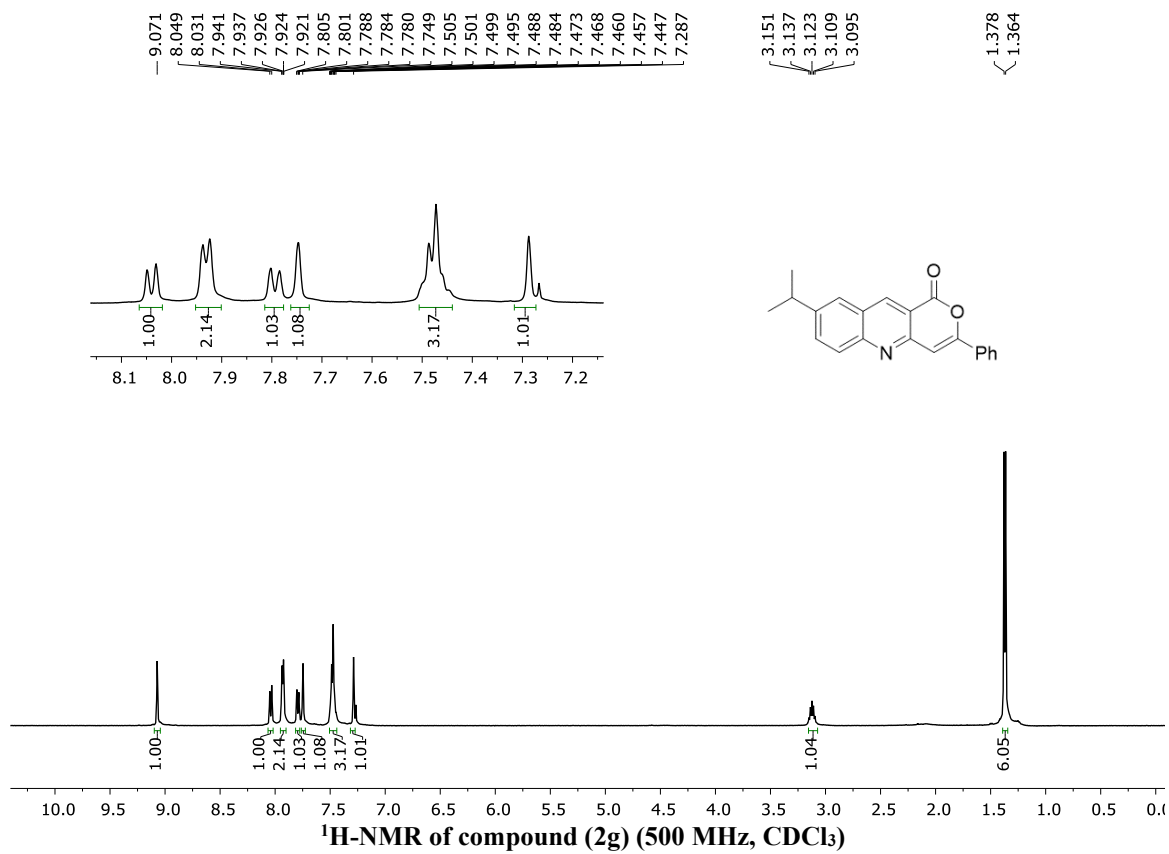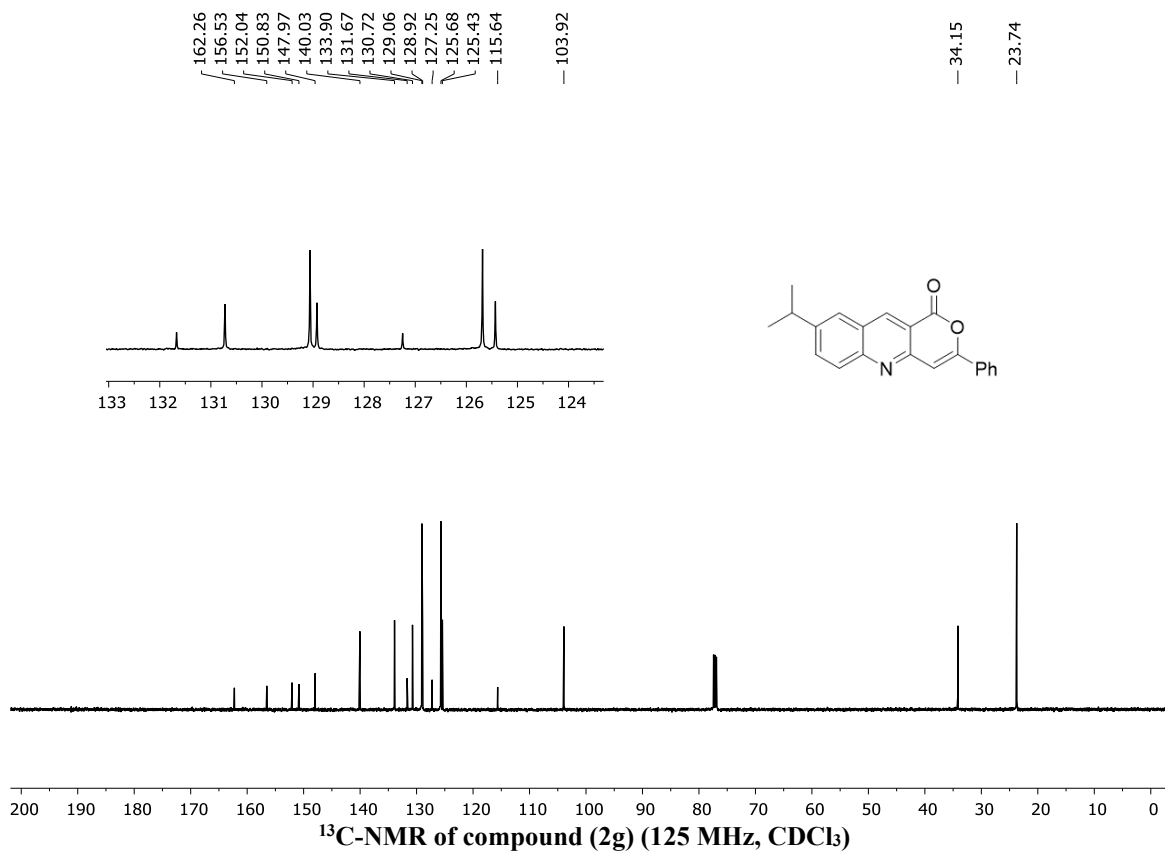

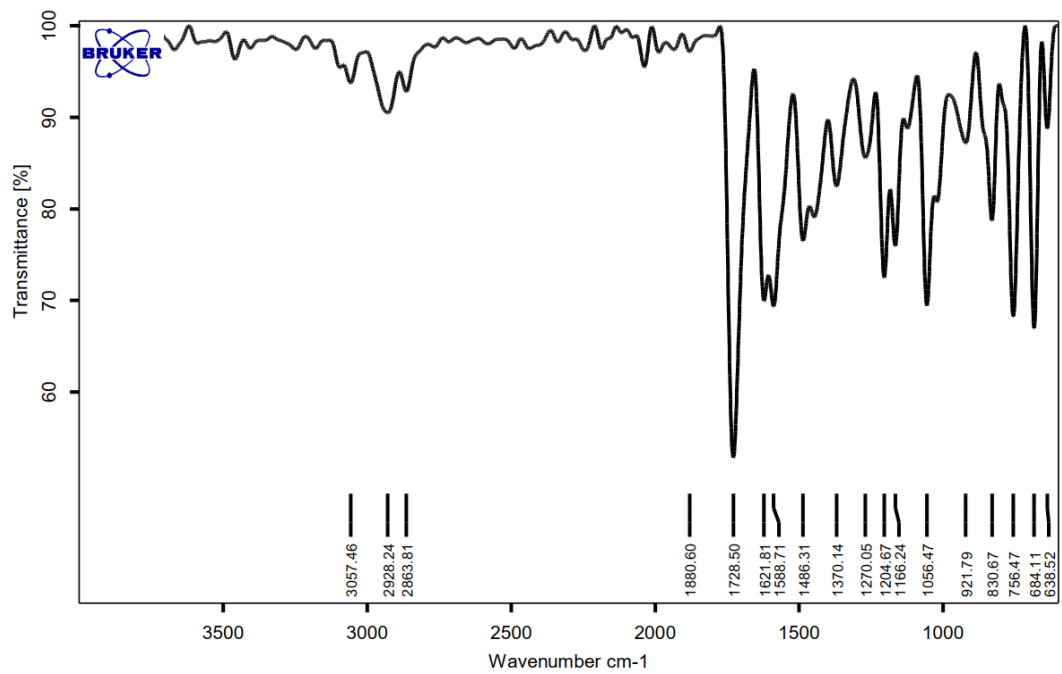

IR spectrum of compound 2g

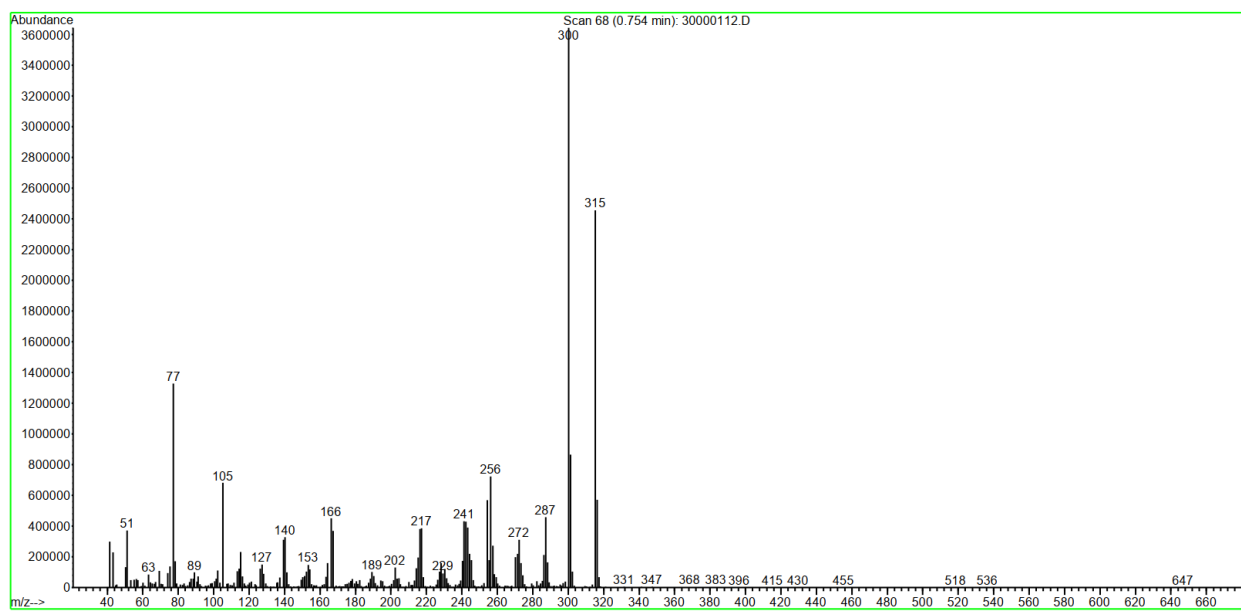

Mass spectrum of compound 2g with the molecular ion peak at 315

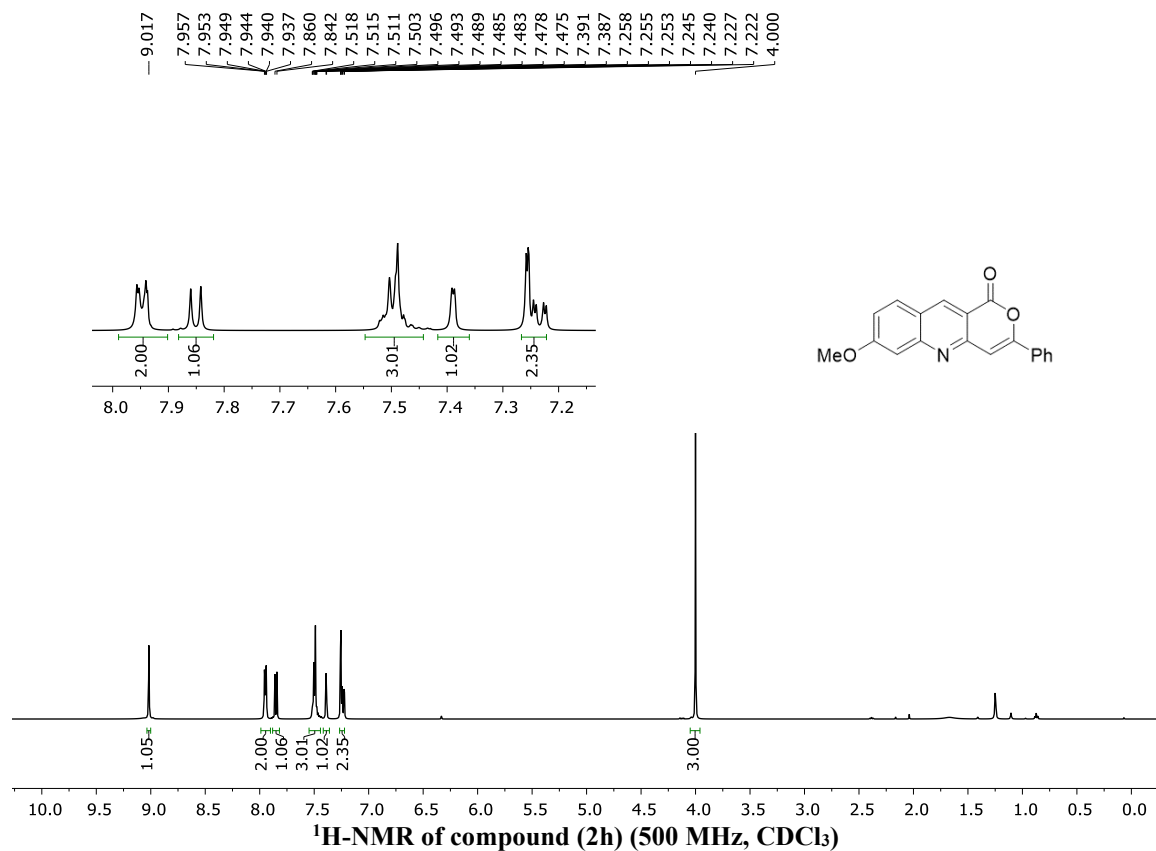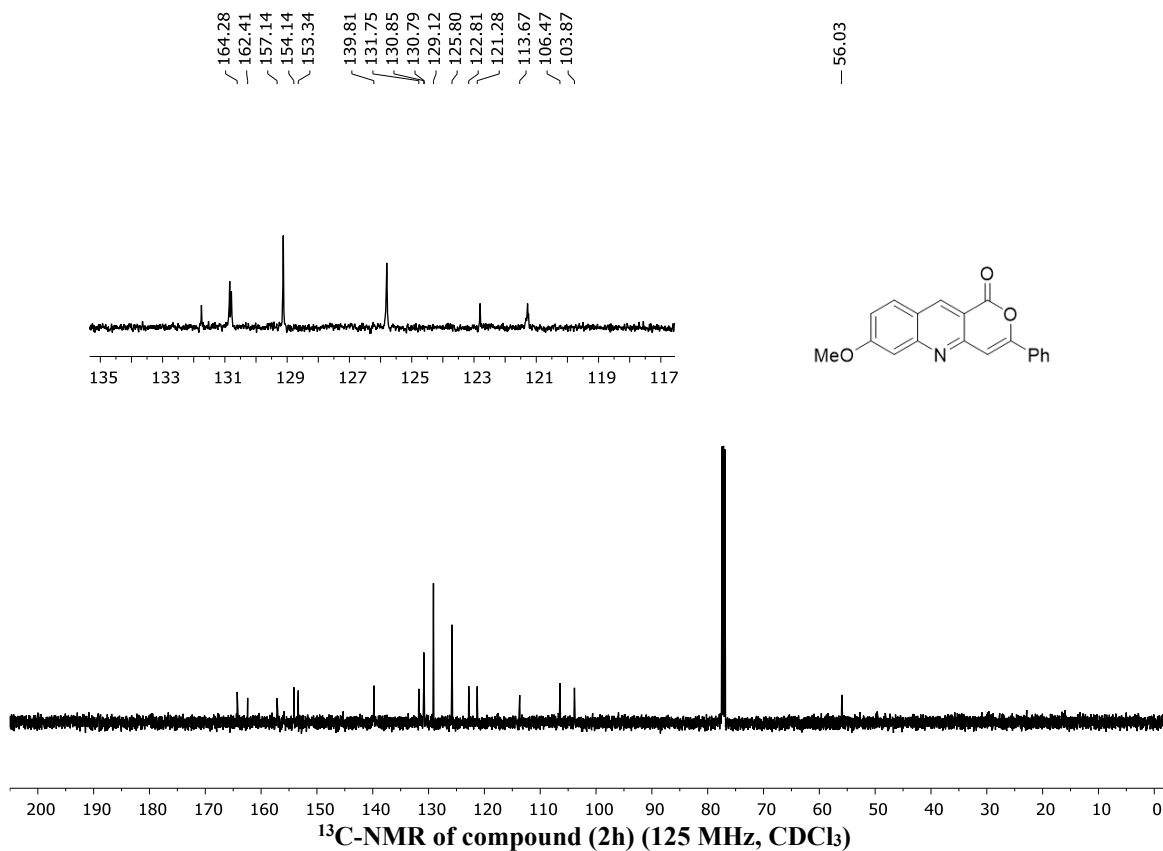

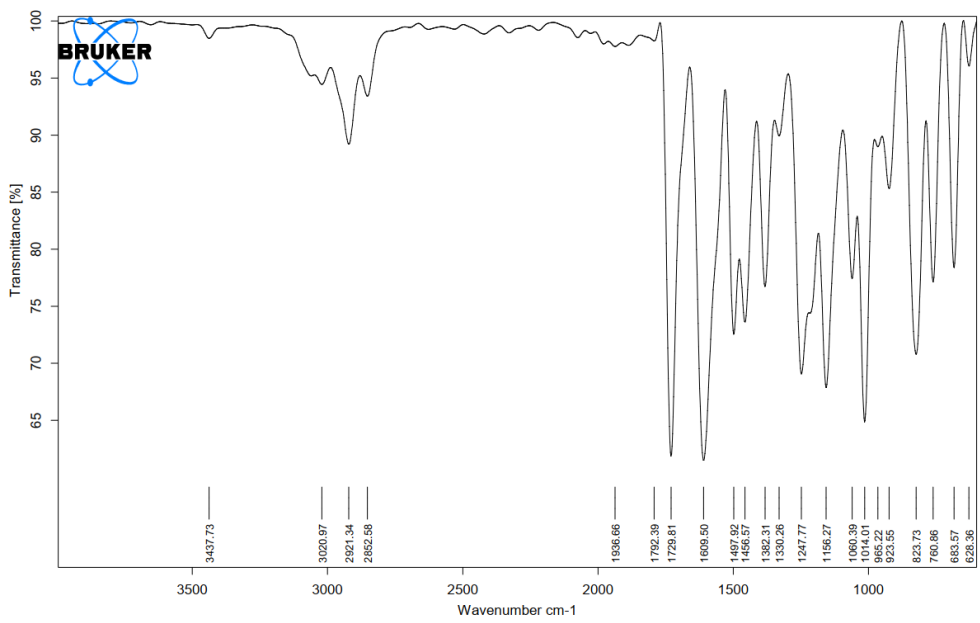

**IR spectrum of compound 2h**

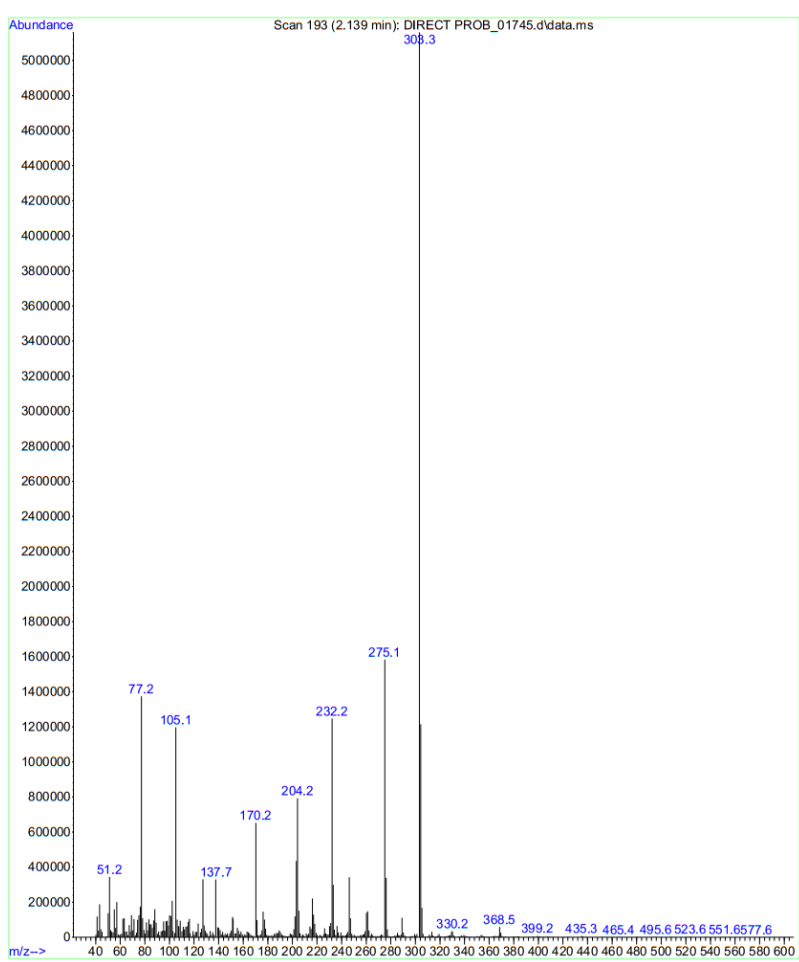

**Mass spectrum of compound 2h with the molecular ion peak at 303**

9.333  
9.327  
9.322  
9.314  
9.306  
8.986  
8.013  
8.007  
8.003  
7.999  
7.992  
7.988  
7.984  
7.979  
7.976  
7.973  
7.967  
7.903  
7.894  
7.888  
7.885  
7.880  
7.876  
7.789  
7.782  
7.779  
7.773  
7.770  
7.766  
7.762  
7.759  
7.755  
7.748  
7.745  
7.727  
7.716  
7.710  
7.541  
7.538  
7.534  
7.532  
7.528  
7.520  
7.514  
7.508  
7.505  
7.503  
7.499  
7.496  
7.490  
7.407  
7.260

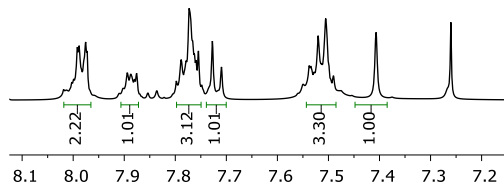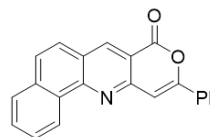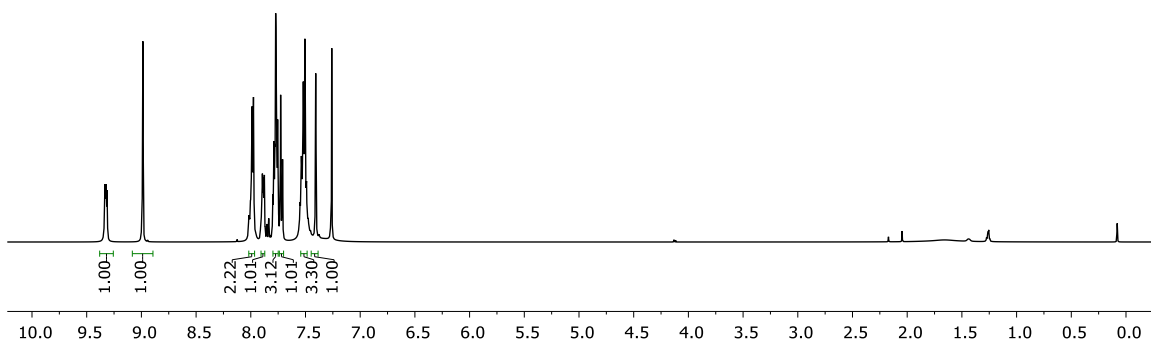

<sup>1</sup>H-NMR of compound (2i) (500 MHz, CDCl<sub>3</sub>)

162.37  
156.78  
152.26  
151.35  
138.59  
135.22  
131.75  
130.76  
130.29  
129.61  
129.10  
128.63  
128.43  
128.20  
127.68  
125.78  
125.64  
125.62  
115.62  
104.35

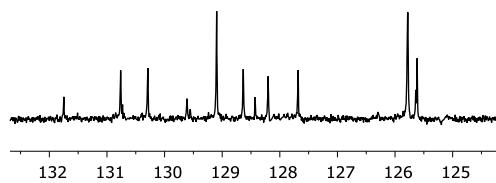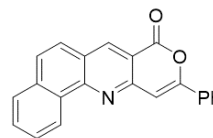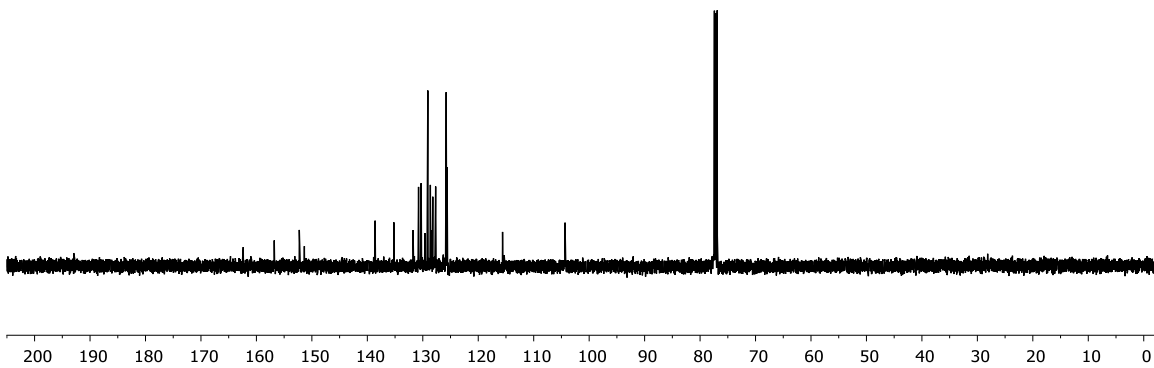

<sup>13</sup>C-NMR of compound (2i) (125 MHz, CDCl<sub>3</sub>)



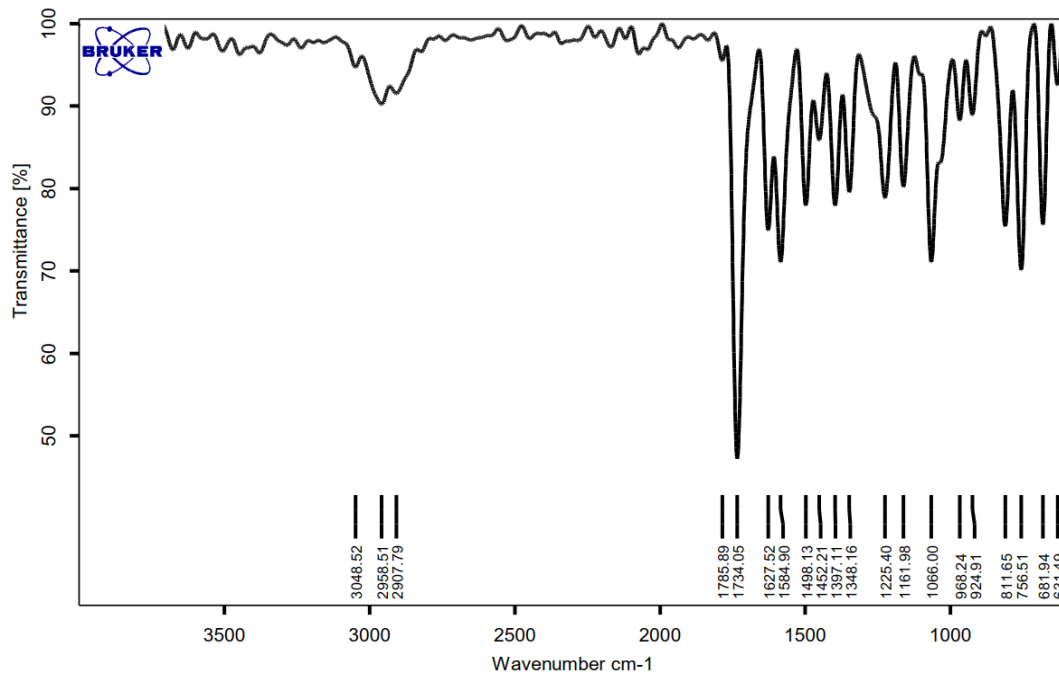

IR spectrum of compound 2i

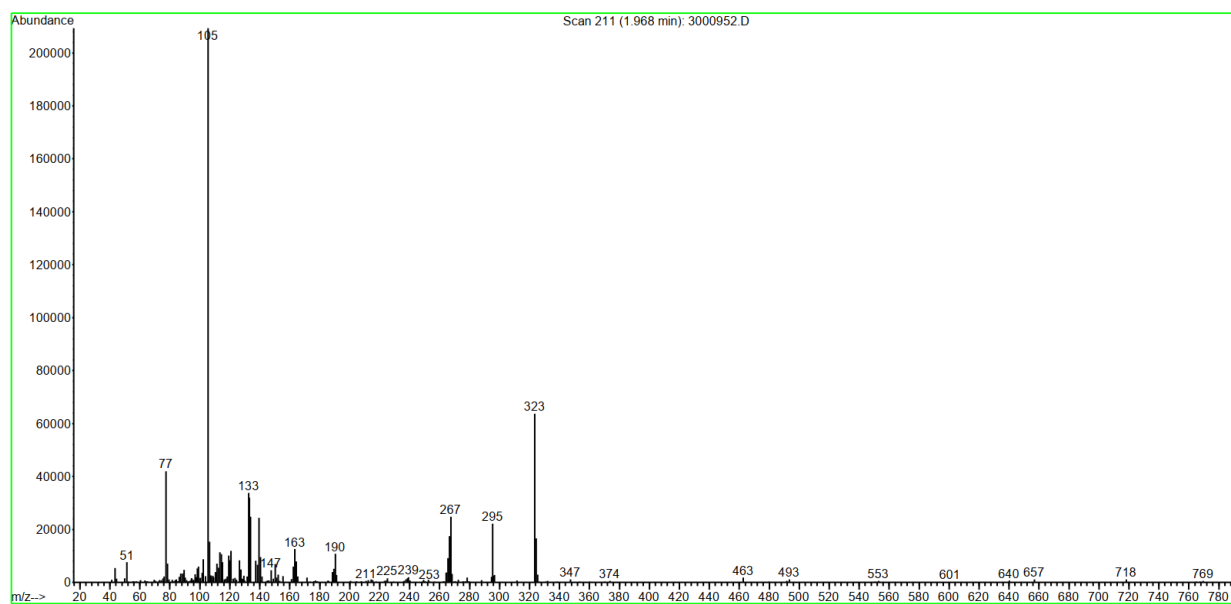

Mass spectrum of compound 2i with the molecular ion peak at 323

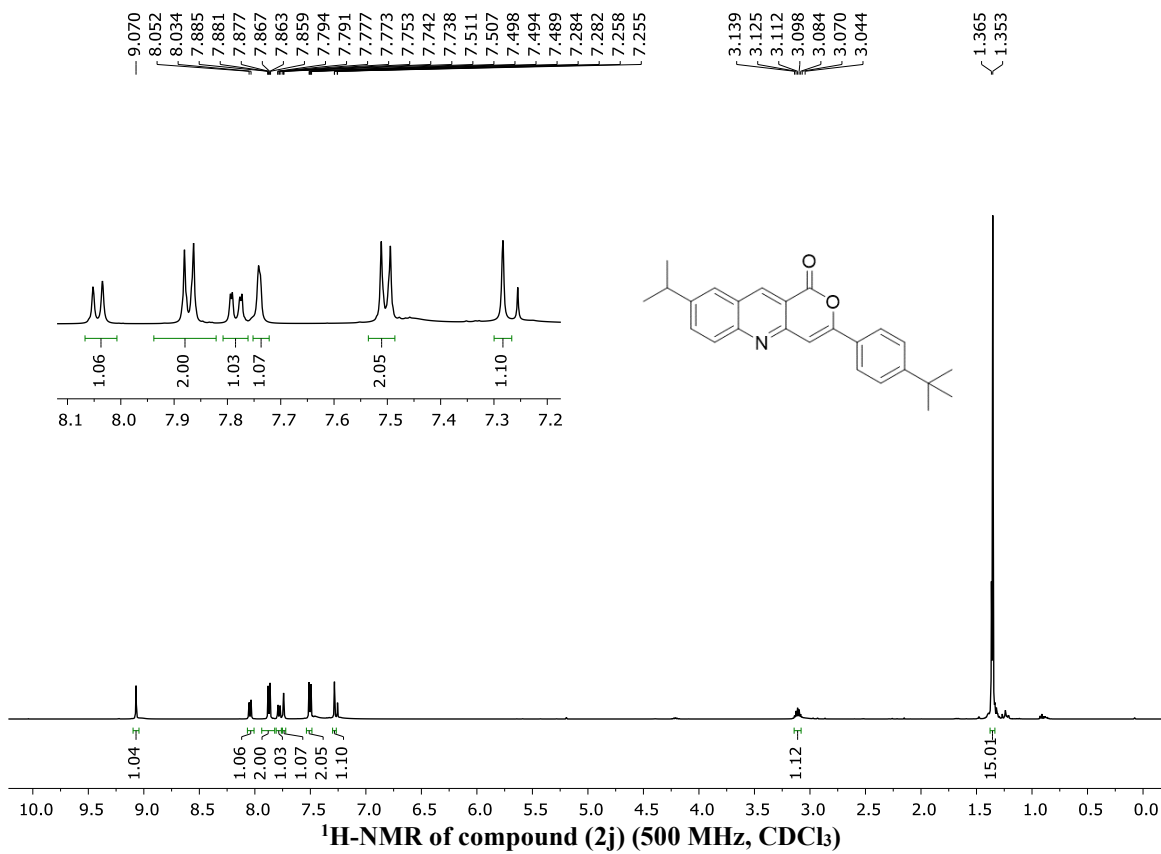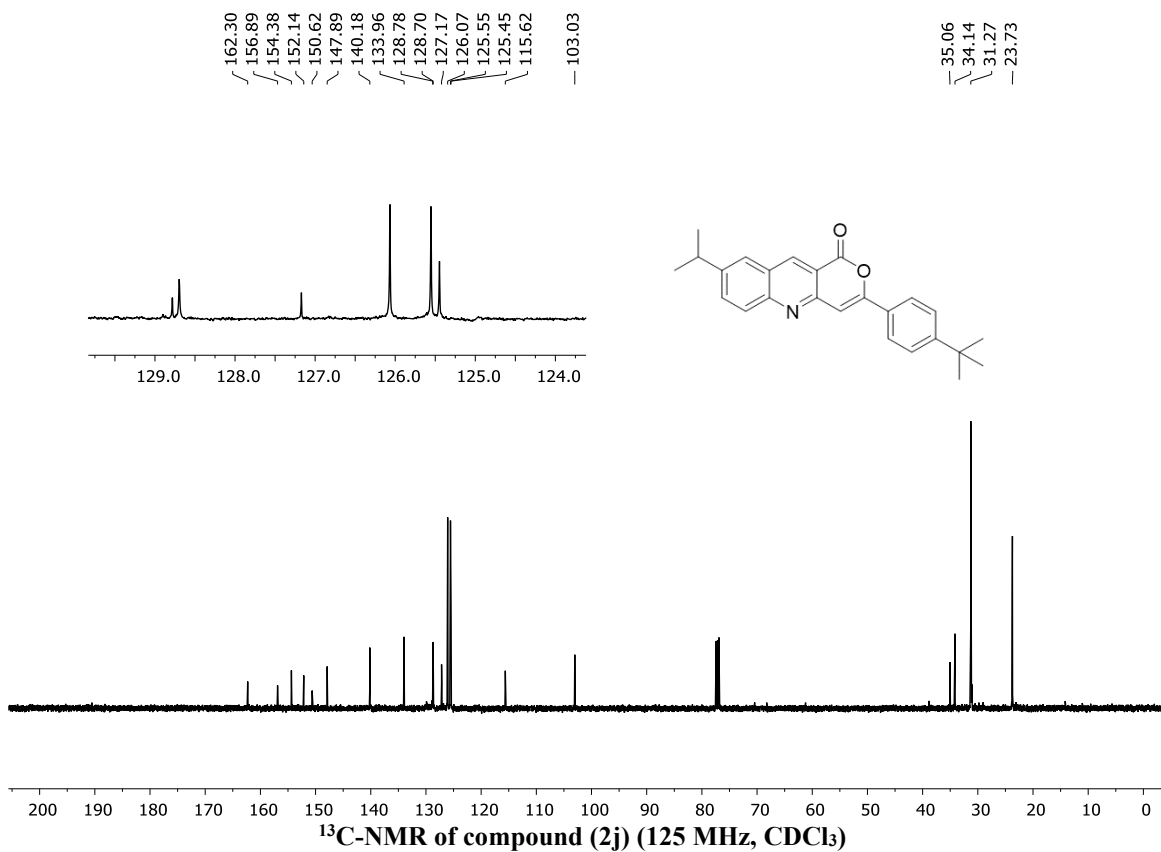

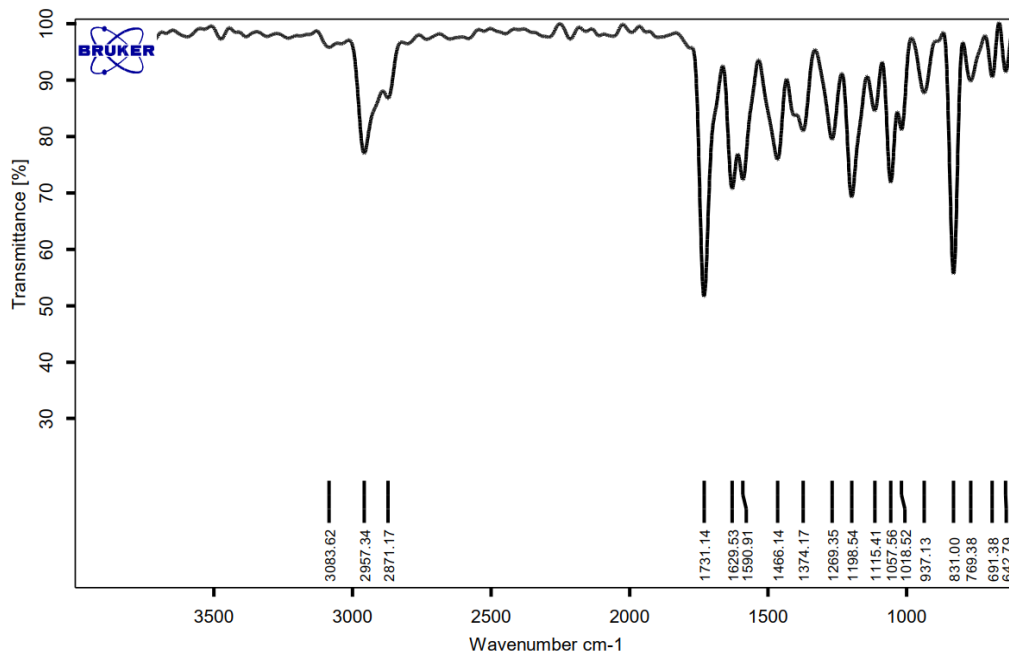

IR spectrum of compound 2j

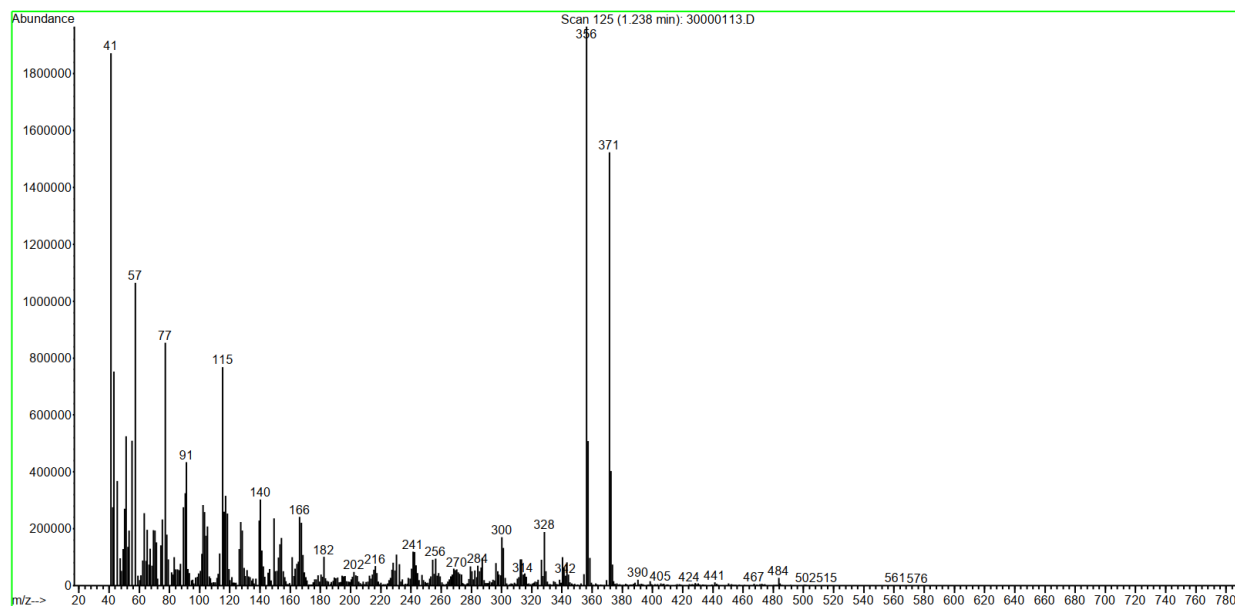

Mass spectrum of compound 2j with the molecular ion peak at 371

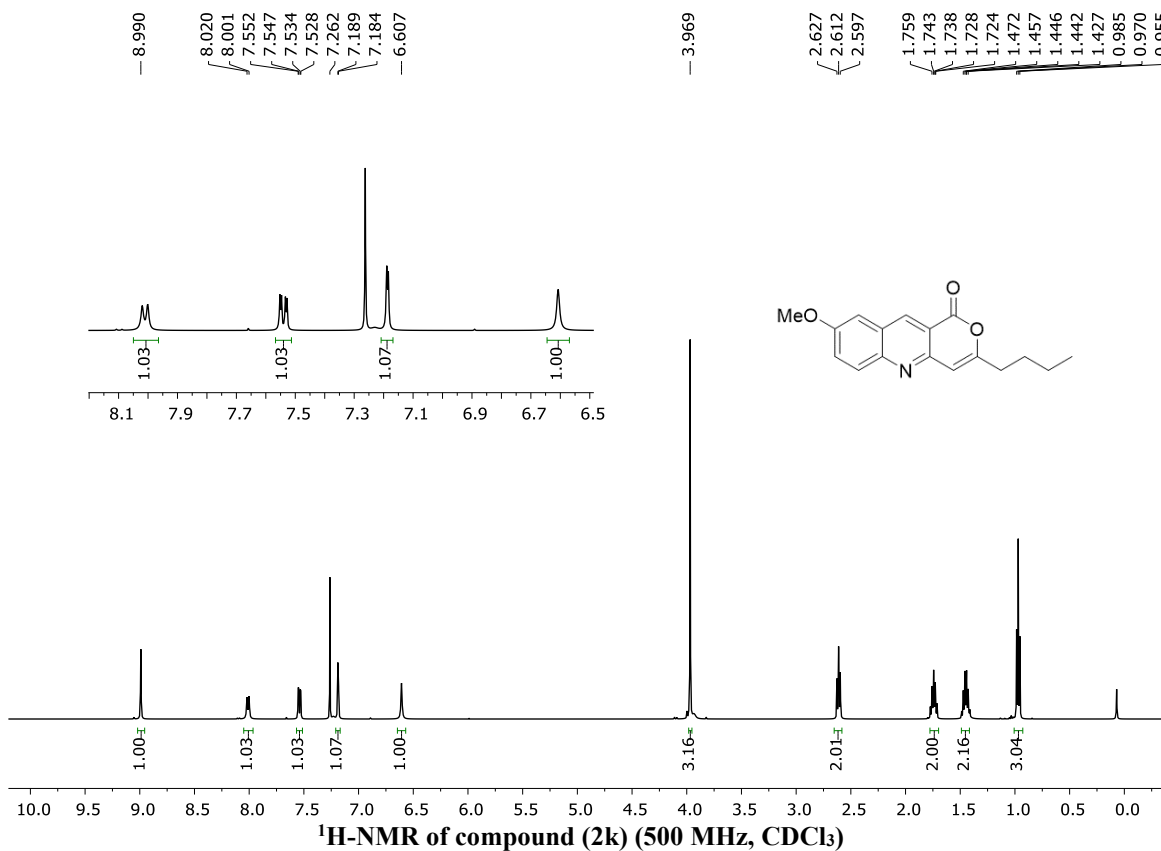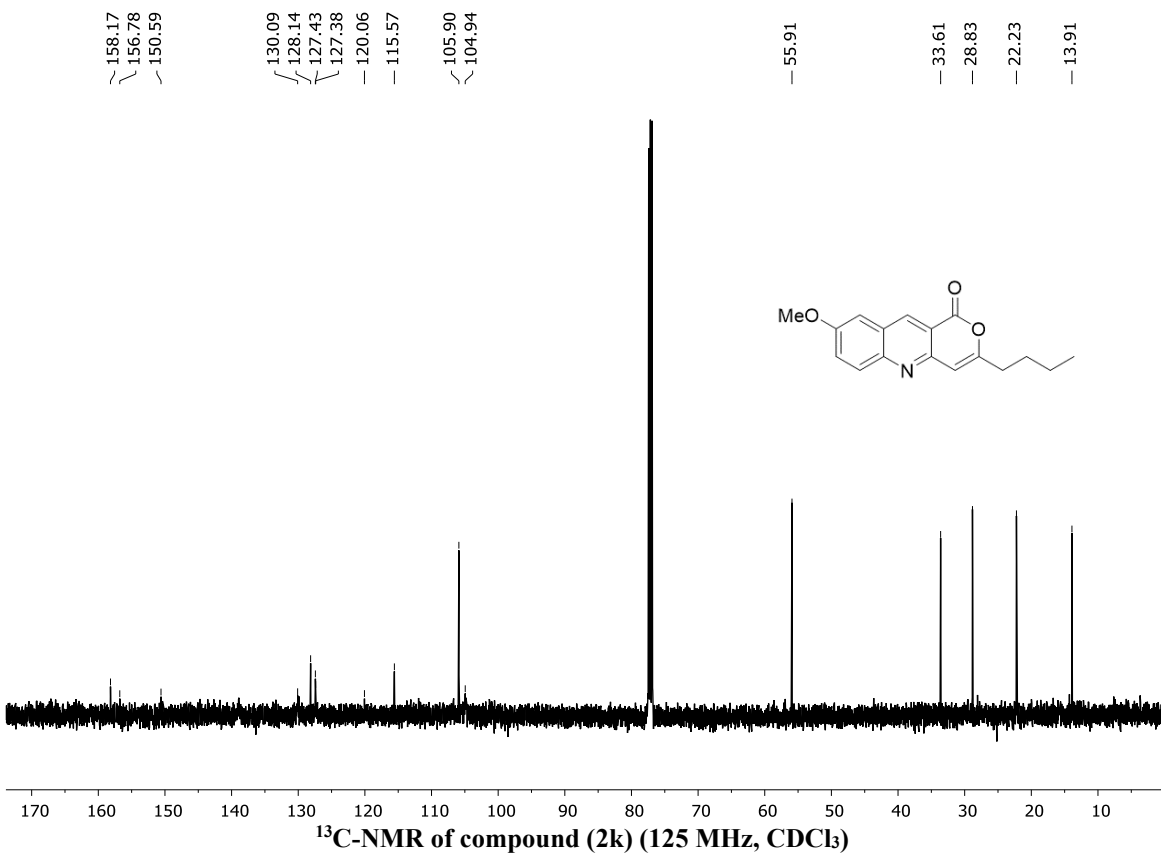

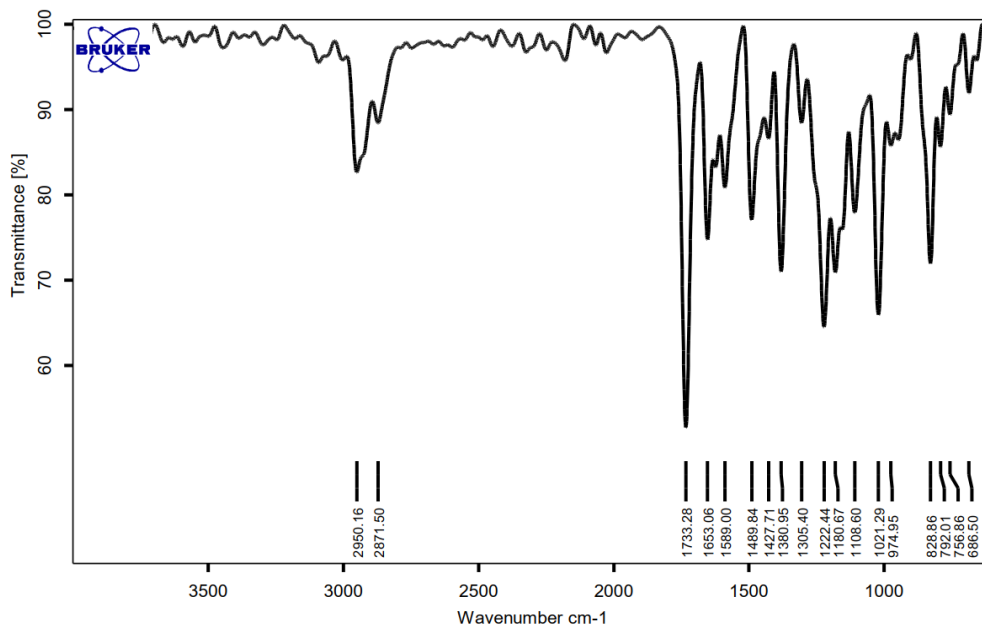

IR spectrum of compound 2k

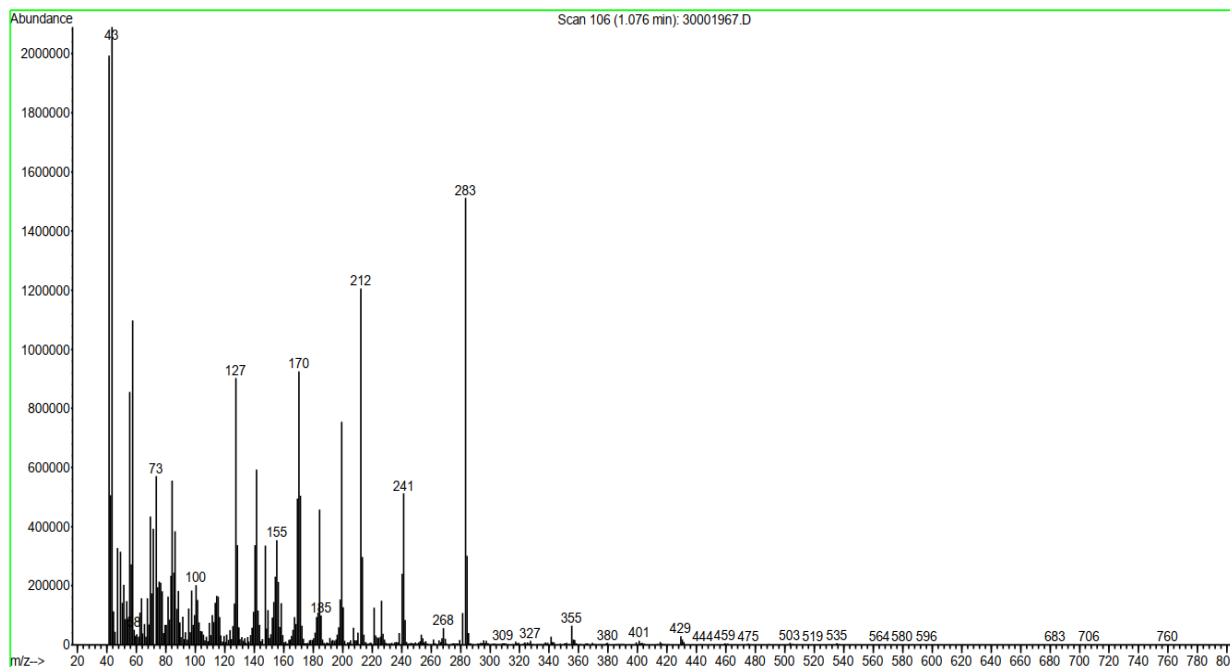

Mass spectrum of compound 2k with the molecular ion peak at 283

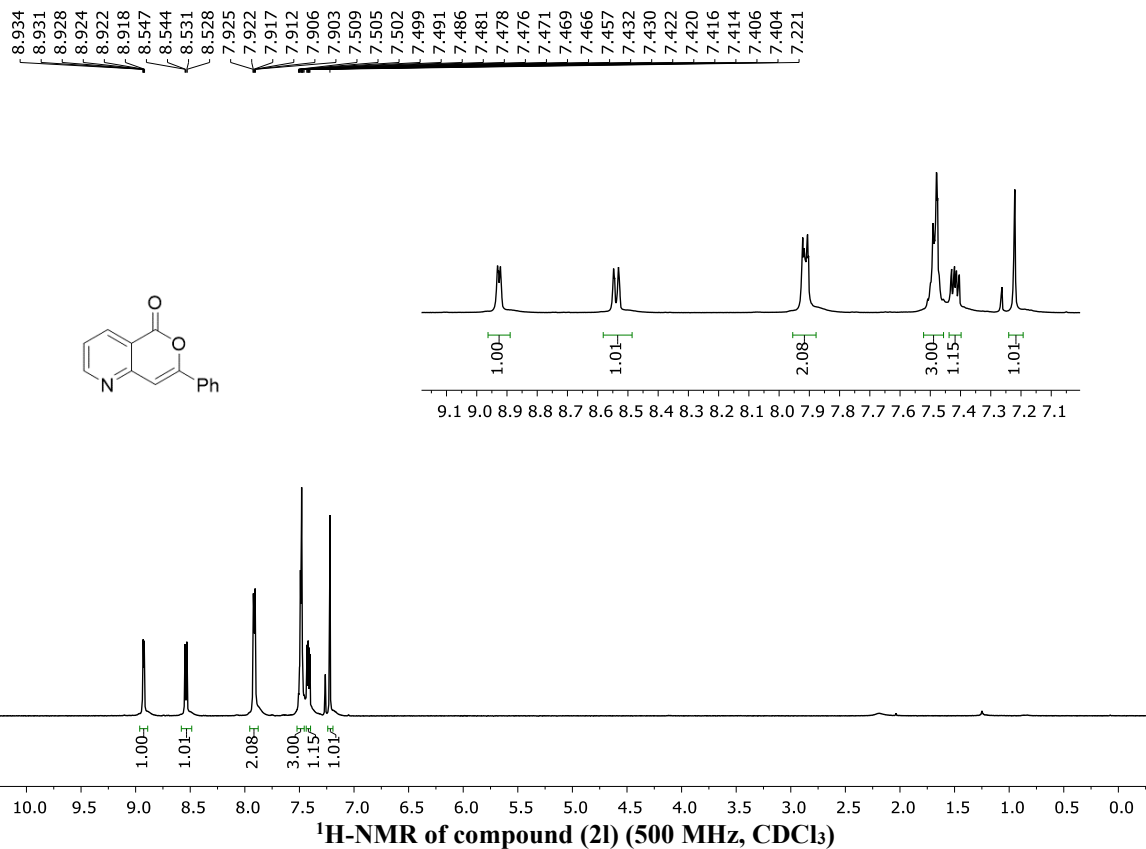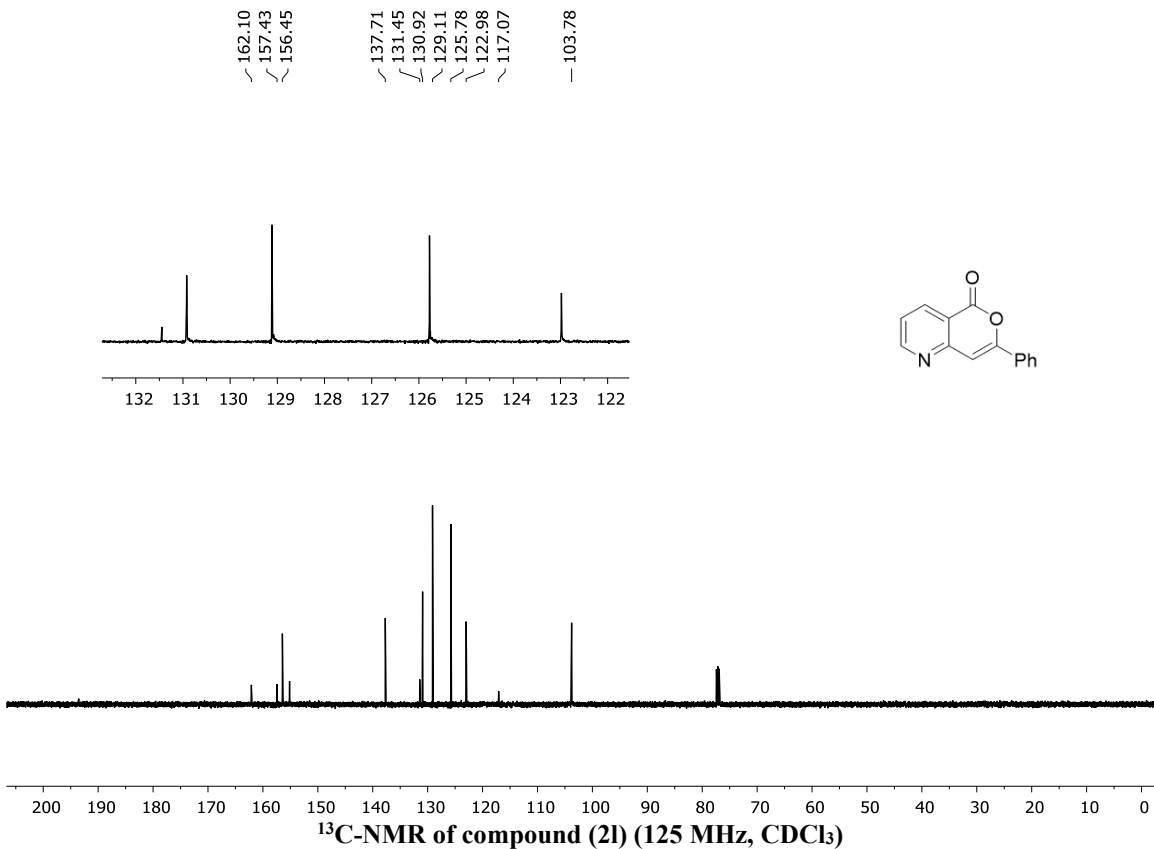

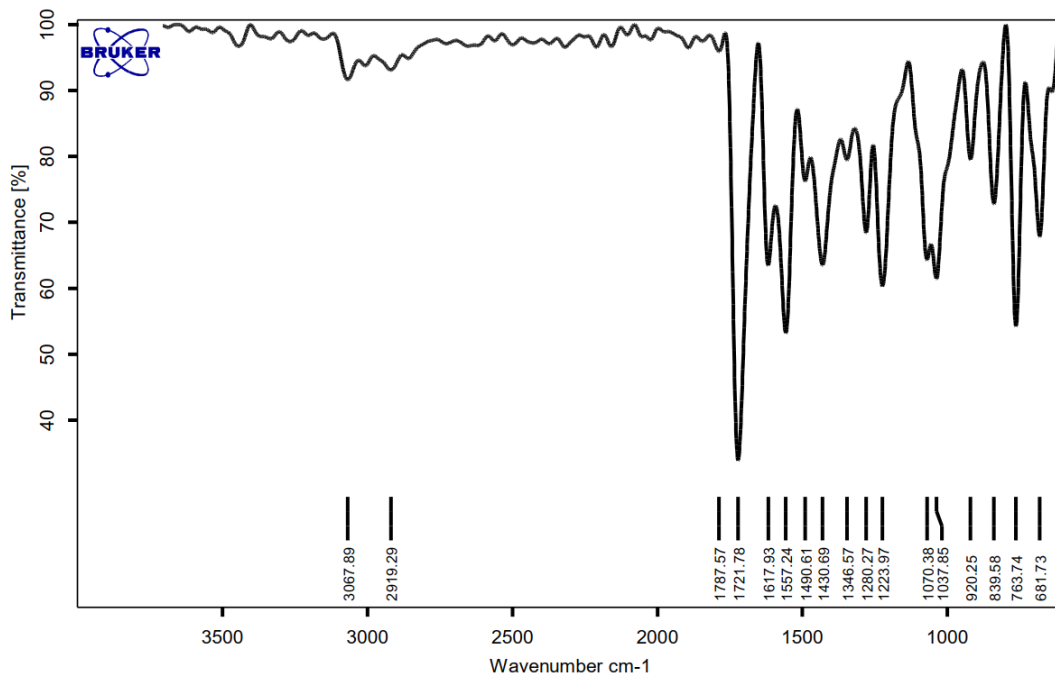

IR spectrum of compound 21

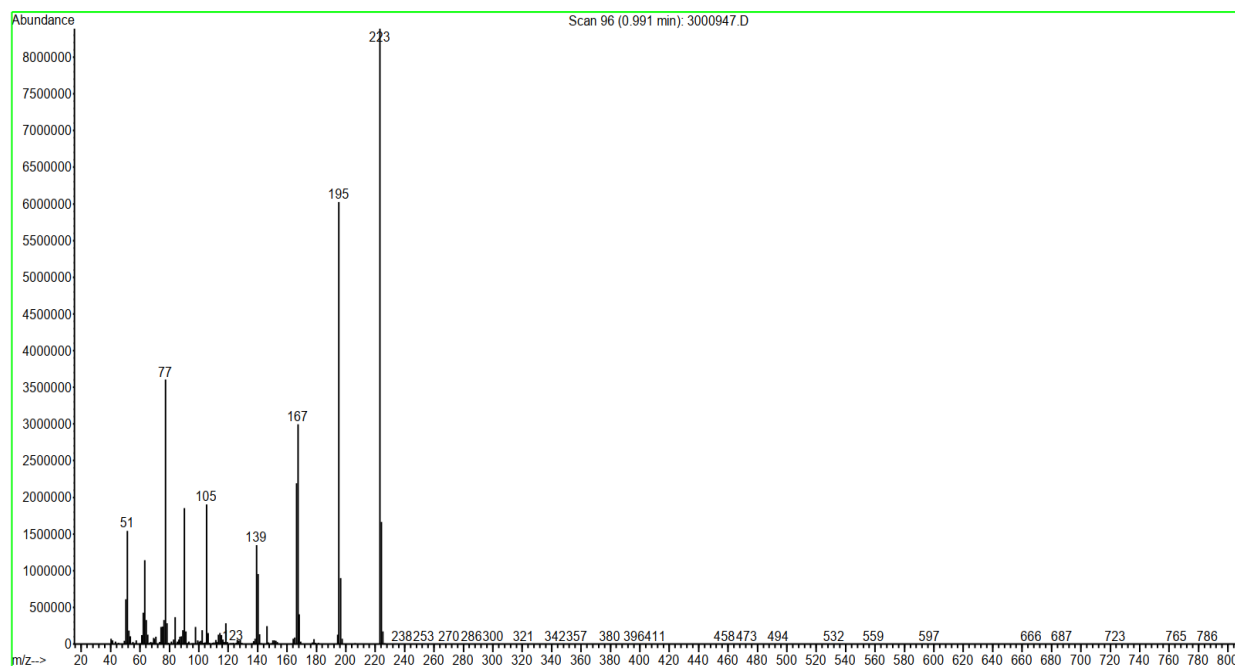

Mass spectrum of compound 21 with the molecular ion peak at 323

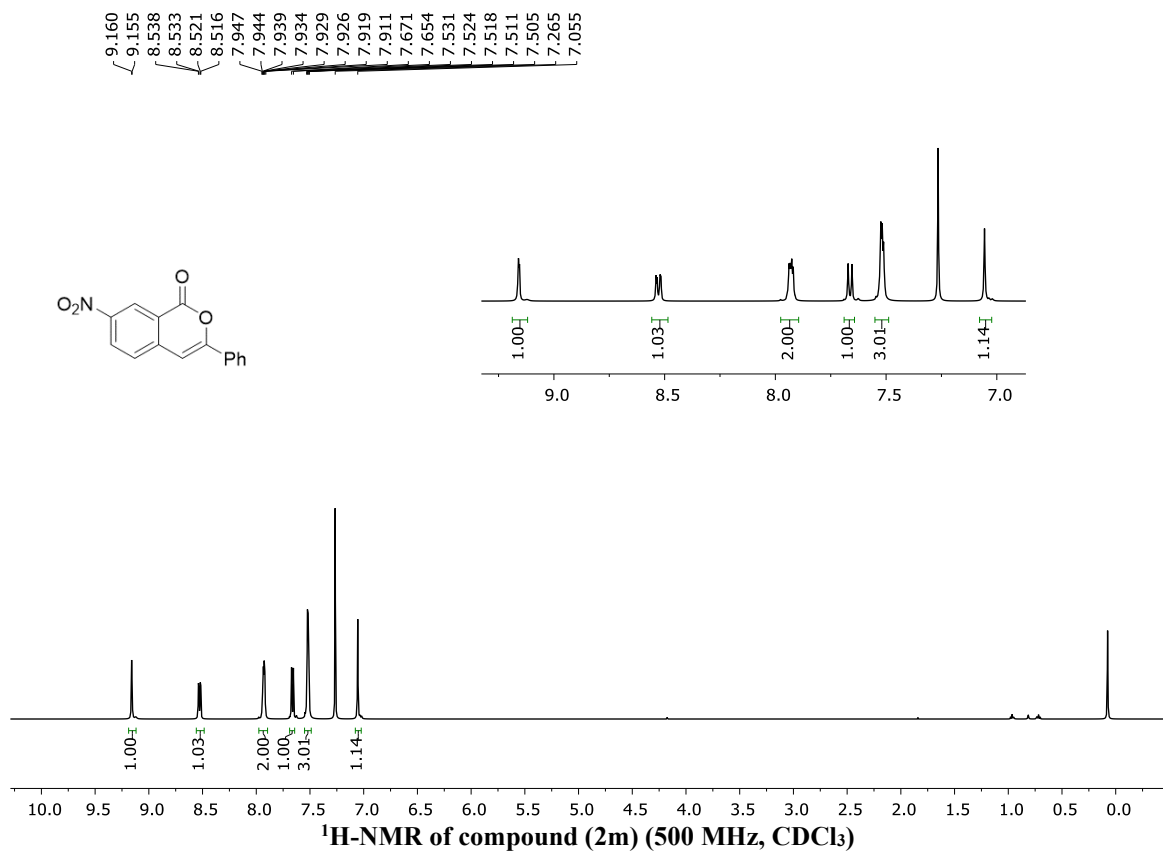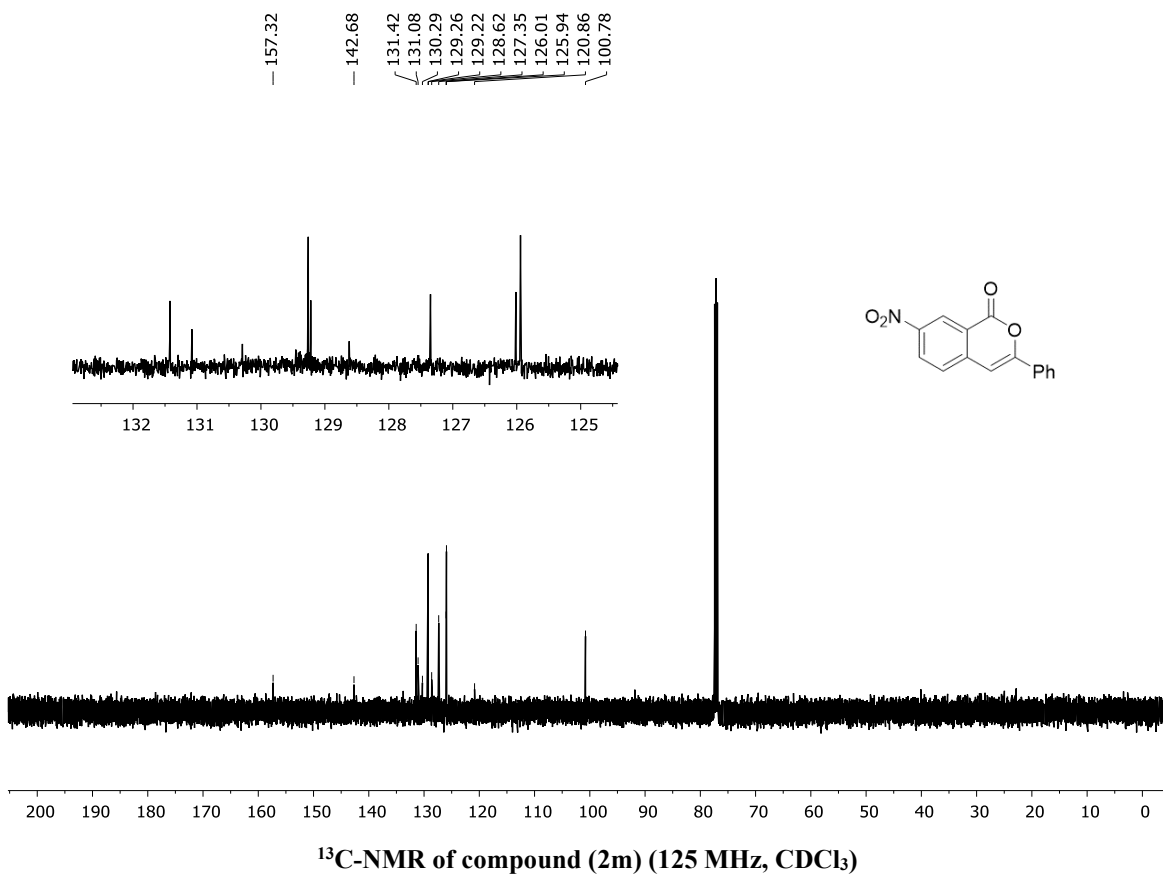



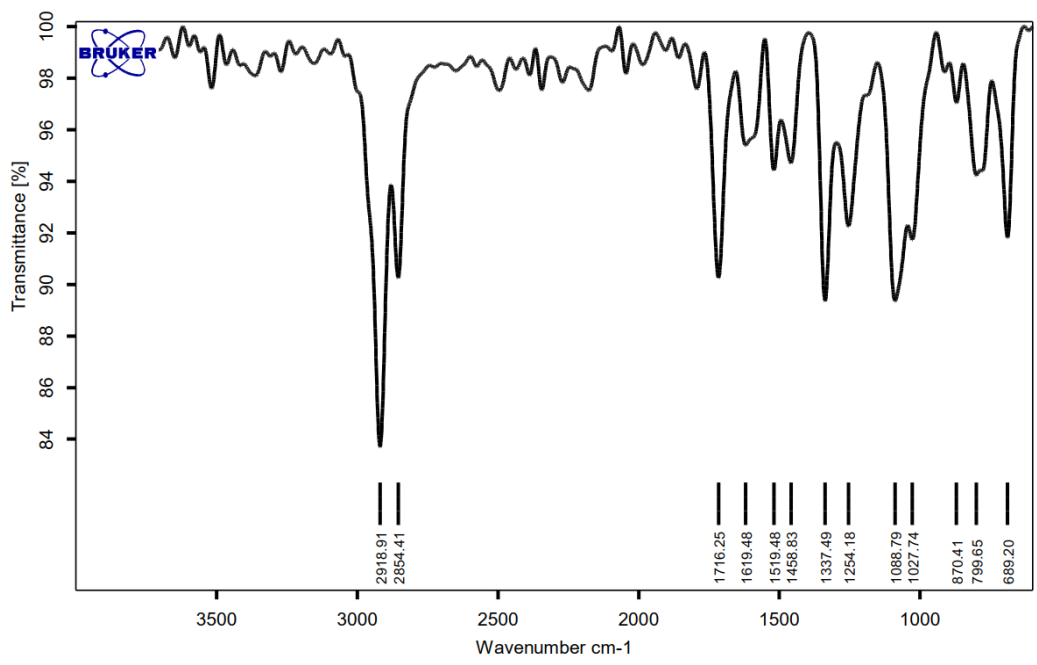

**IR spectrum of compound 2m**

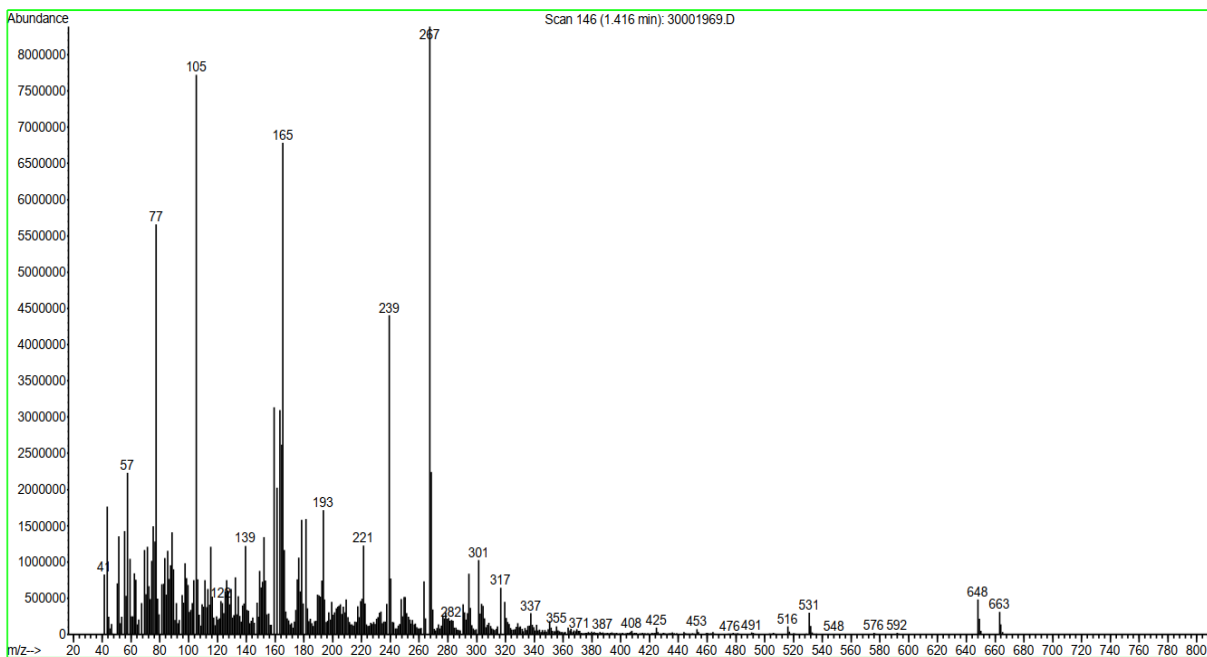

**Mass spectrum of compound 2m with the molecular ion peak at 267**

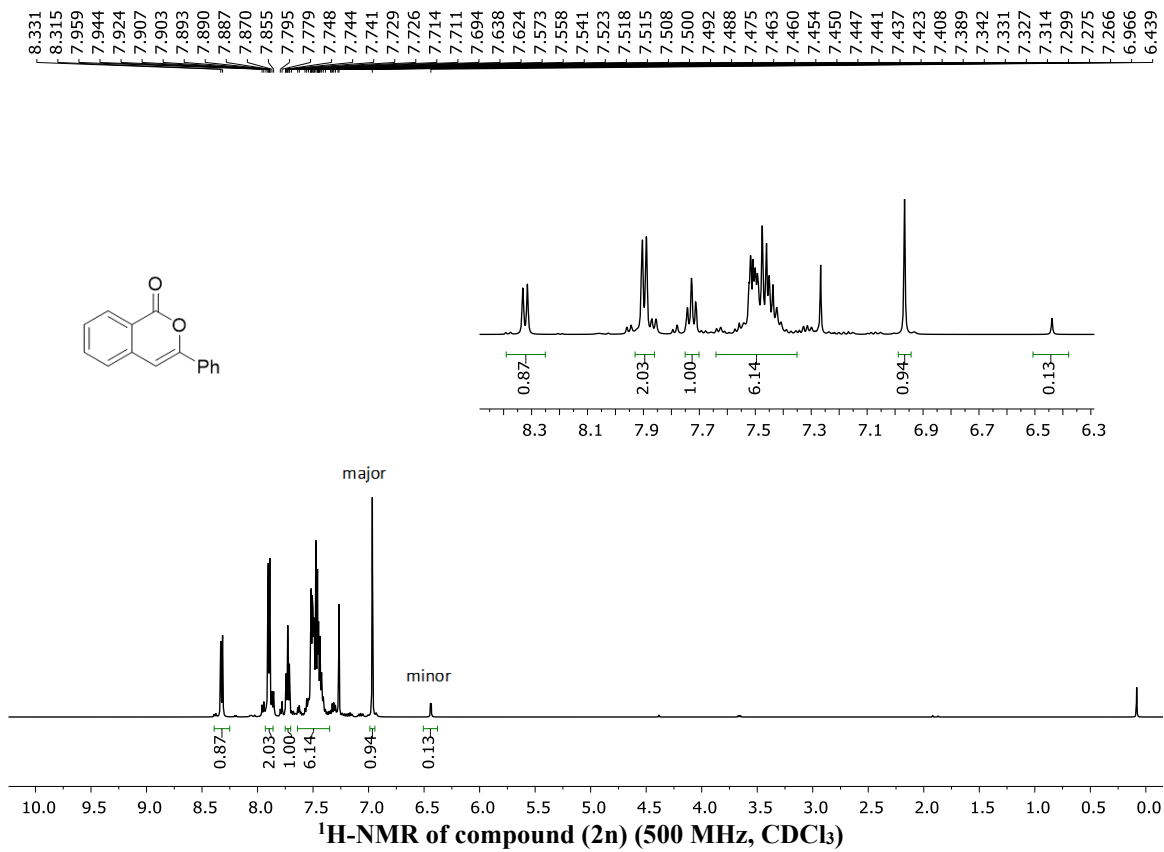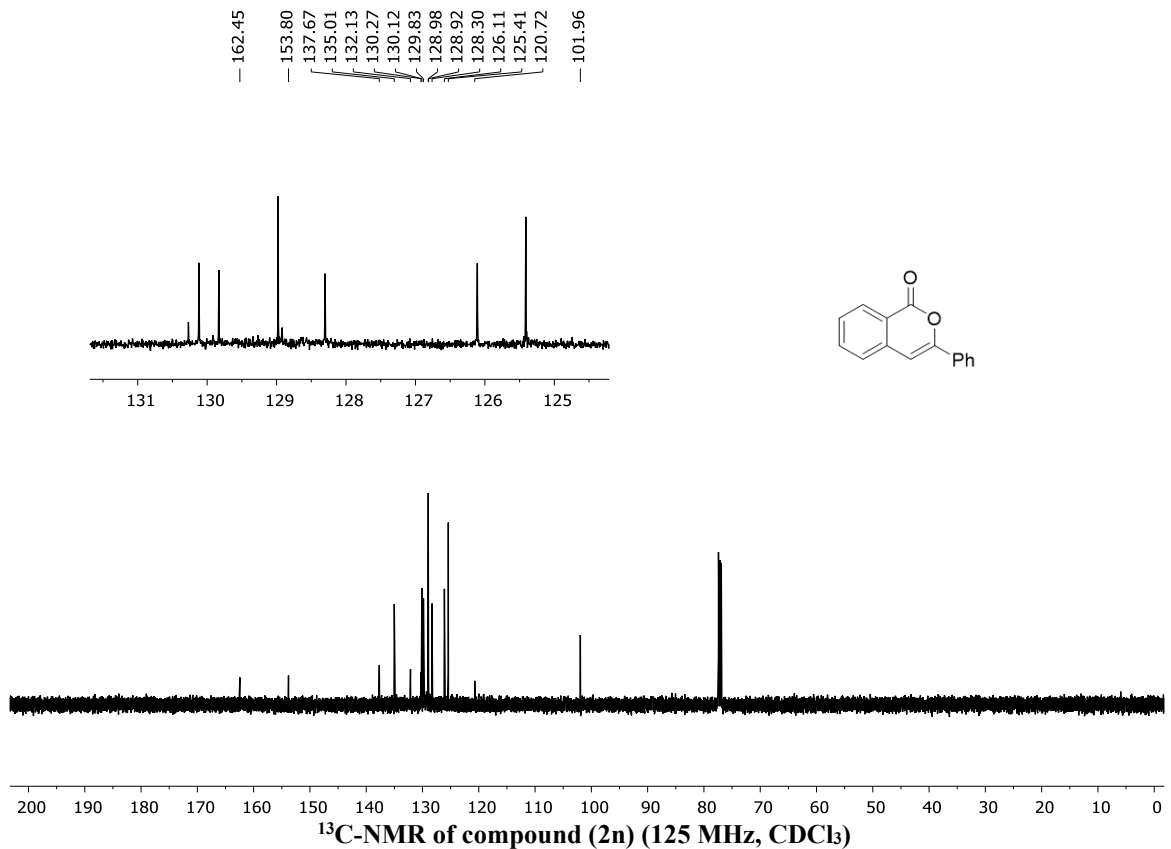

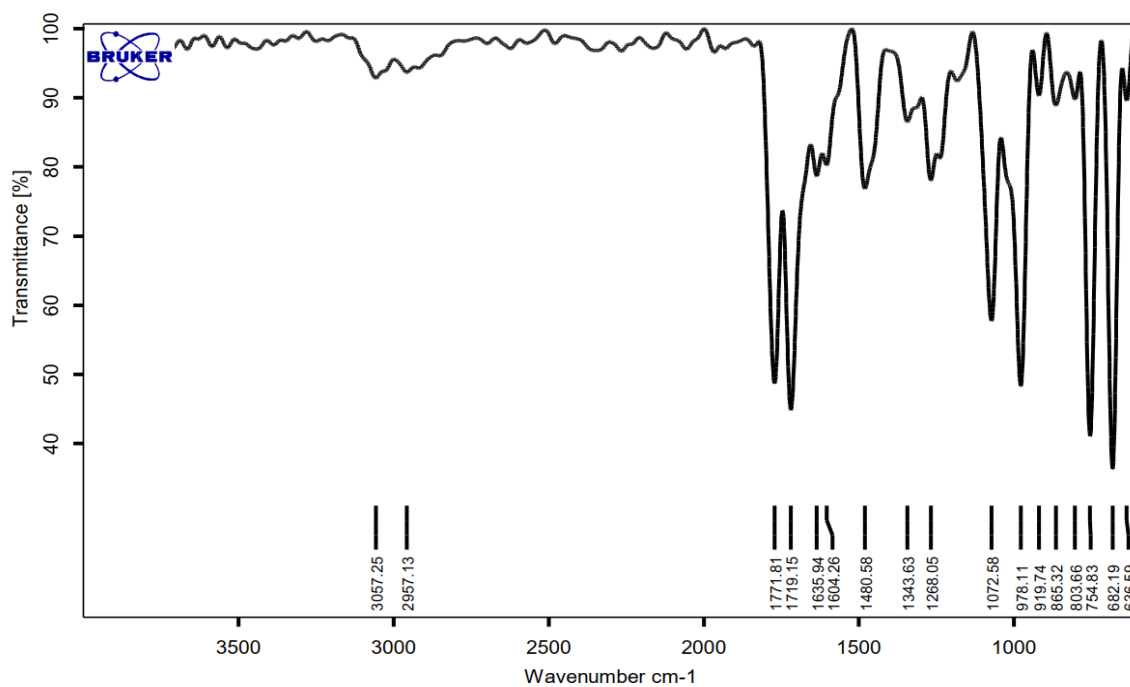

IR spectrum of compound 2n

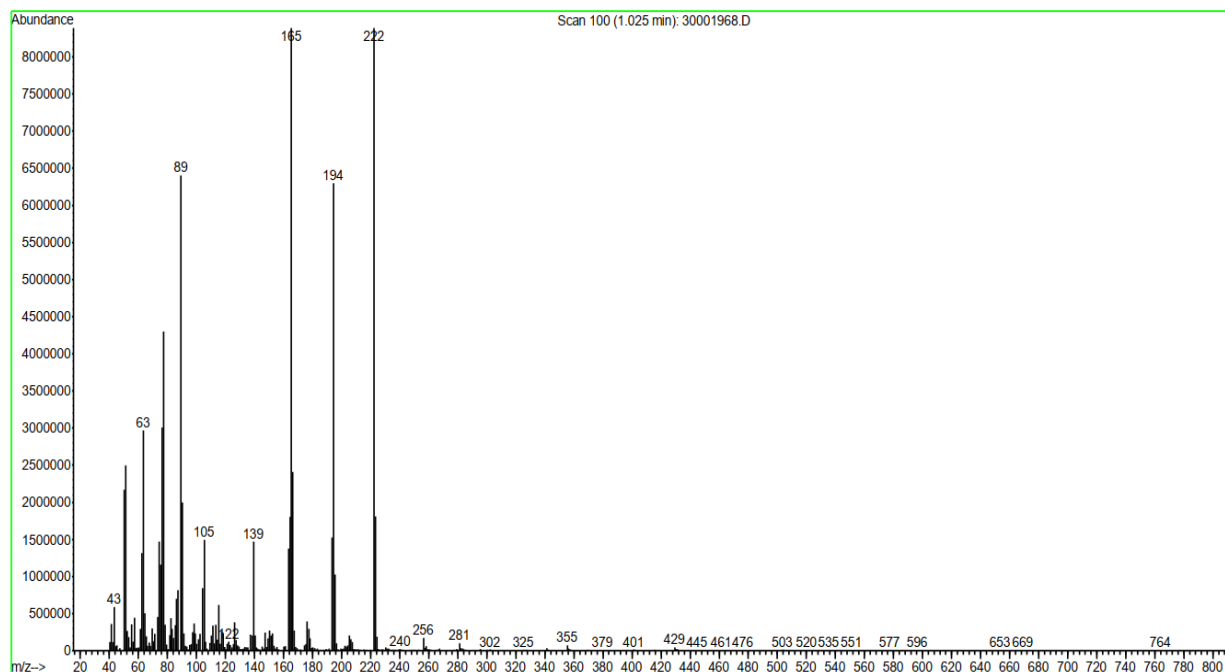

Mass spectrum of compound 2n with the molecular ion peak at 222

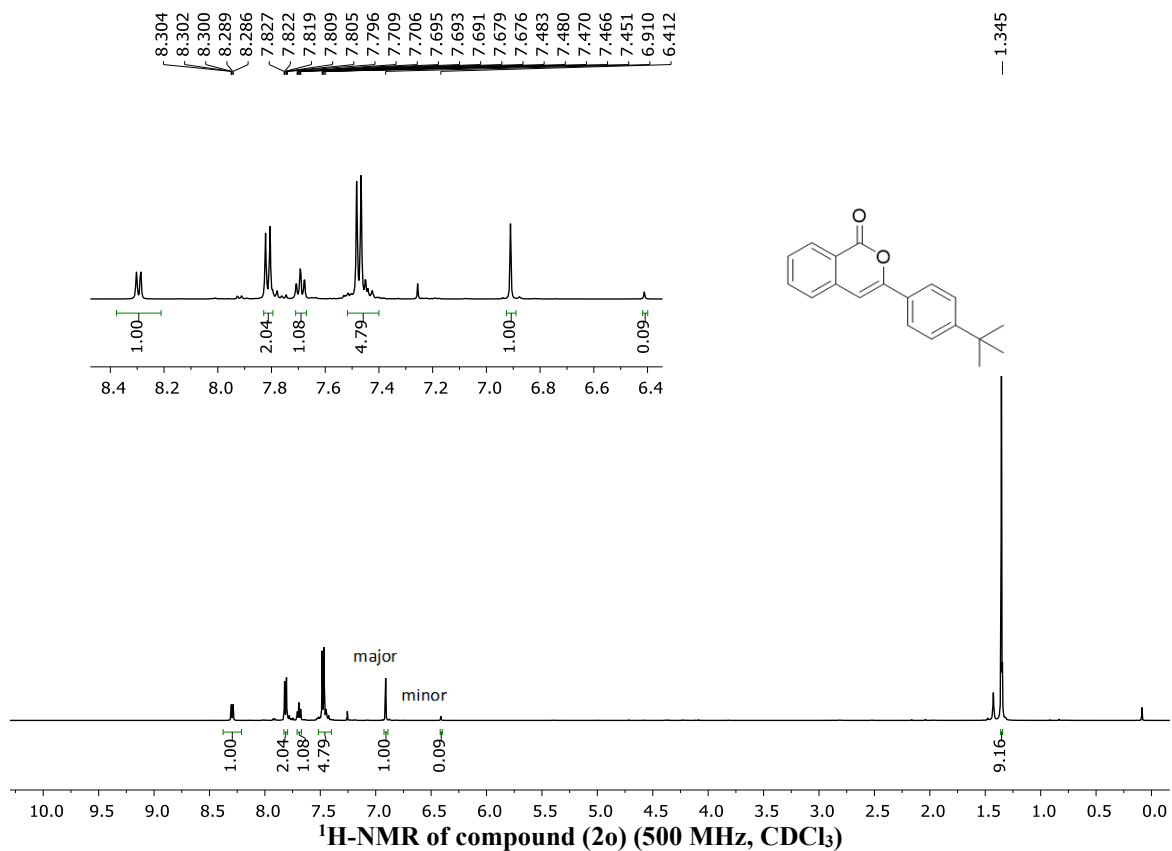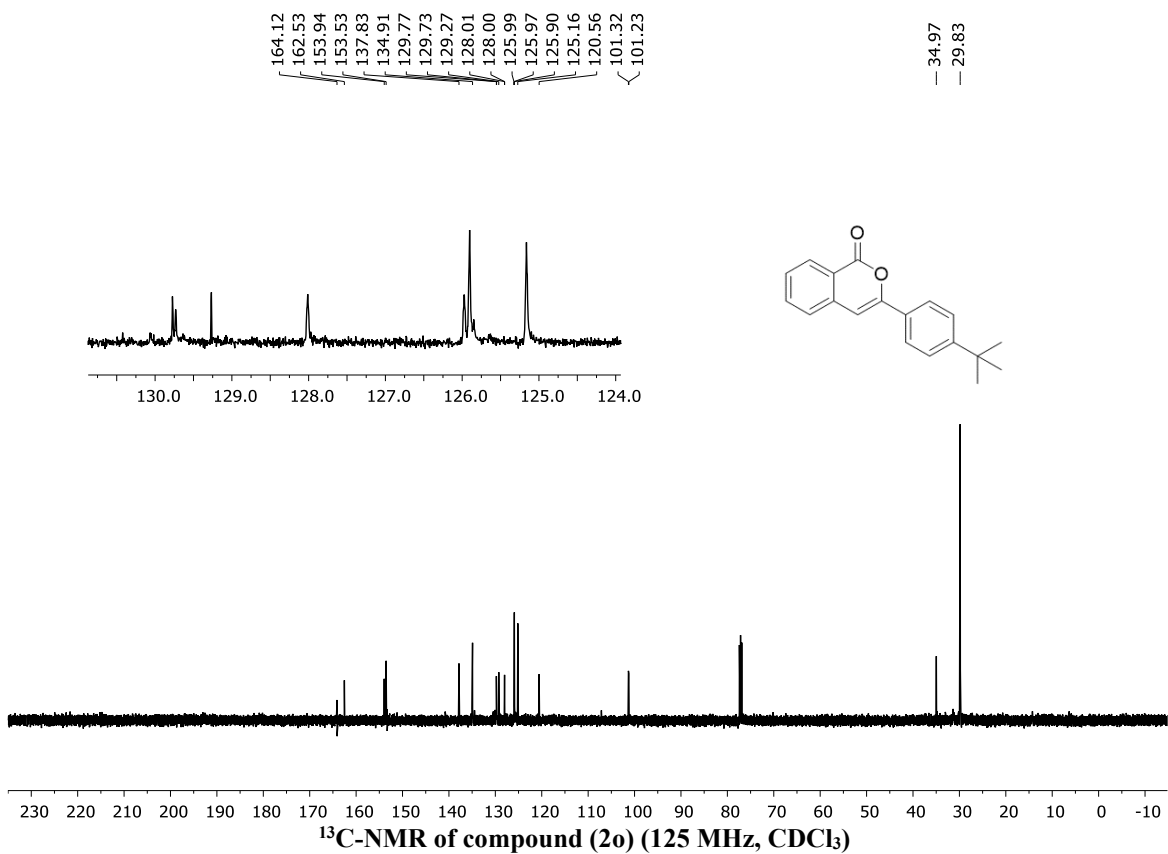

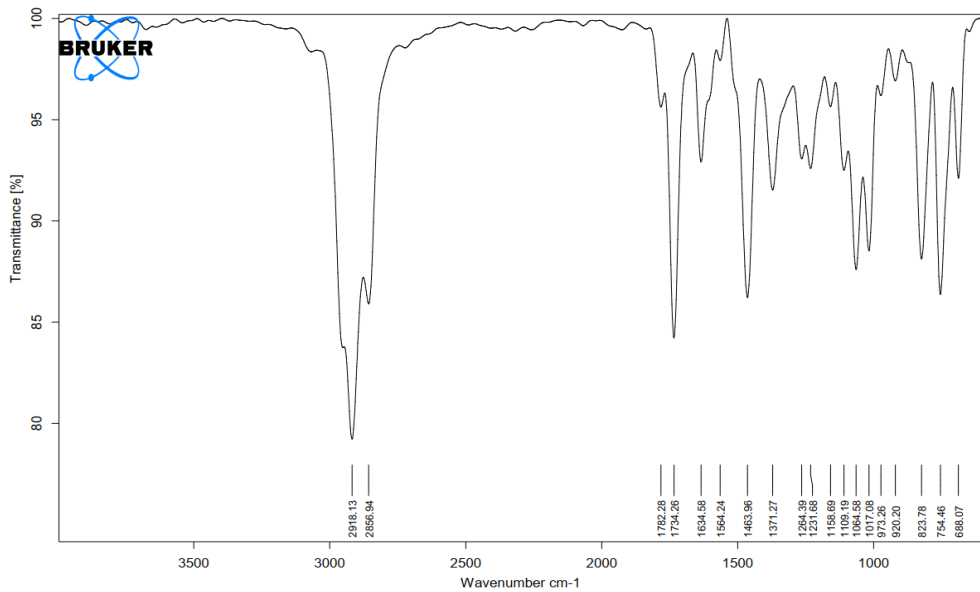

**IR spectrum of compound 2o**

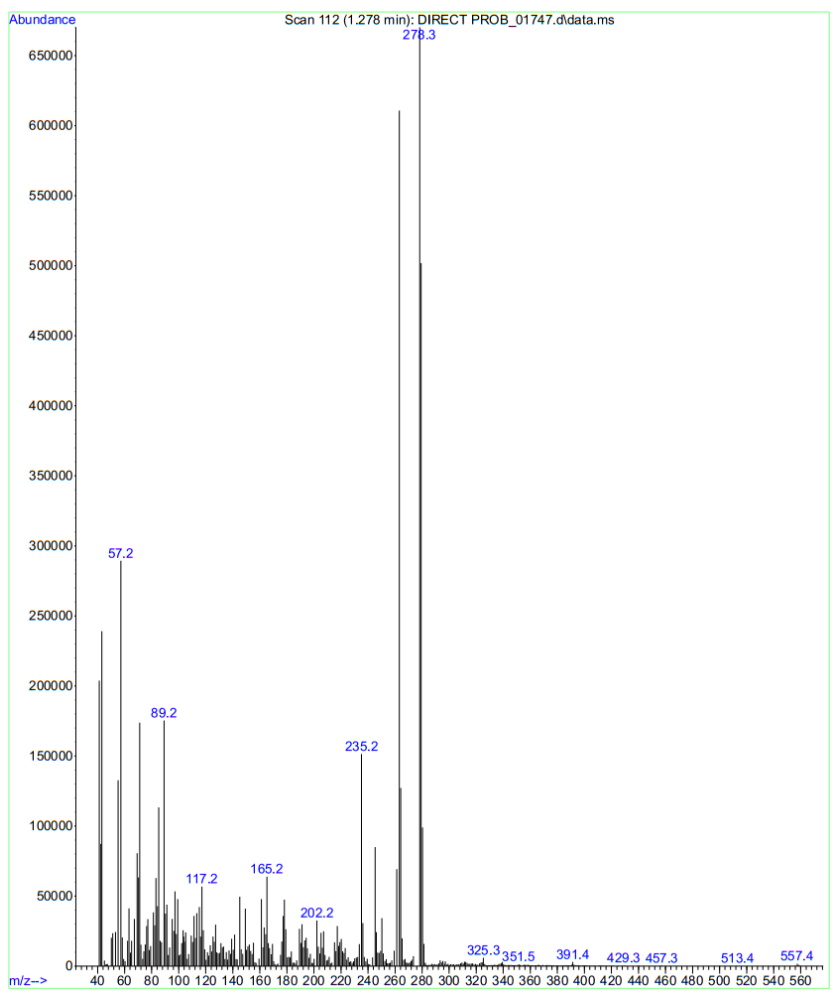

**Mass spectrum of compound 2o with the molecular ion peak at 278**

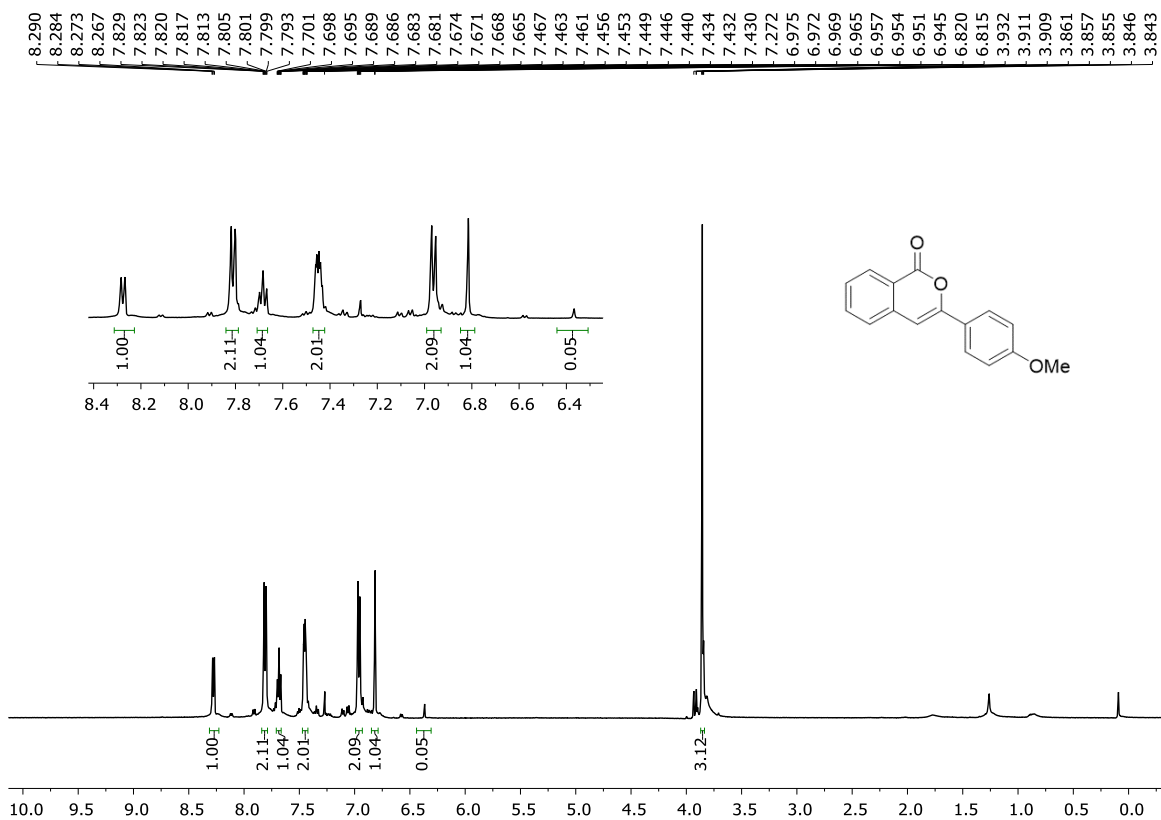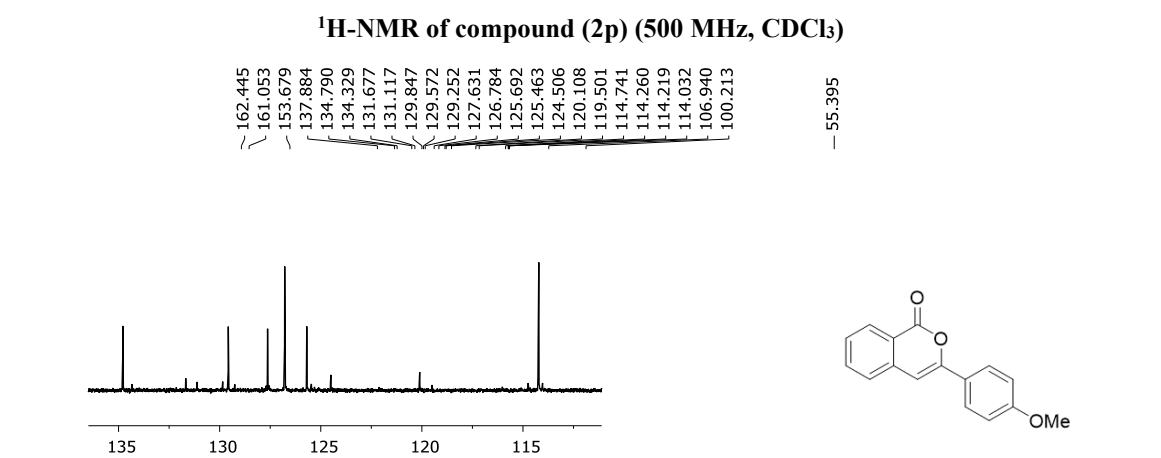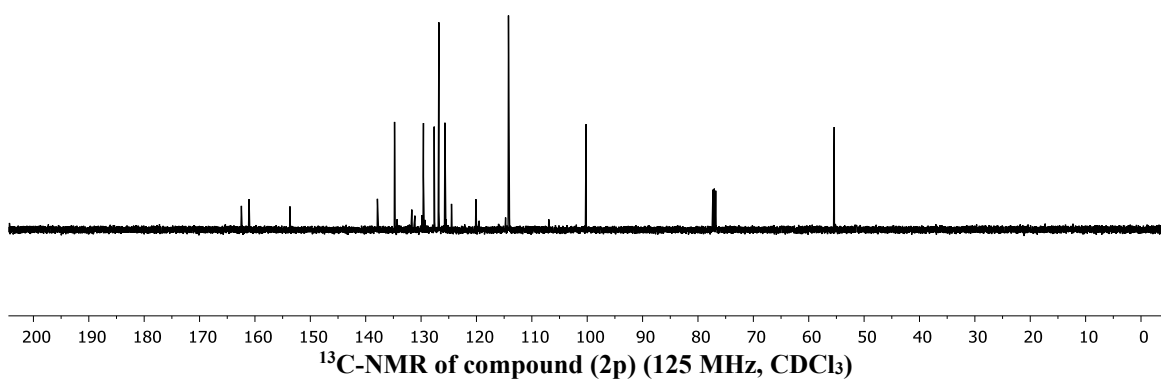

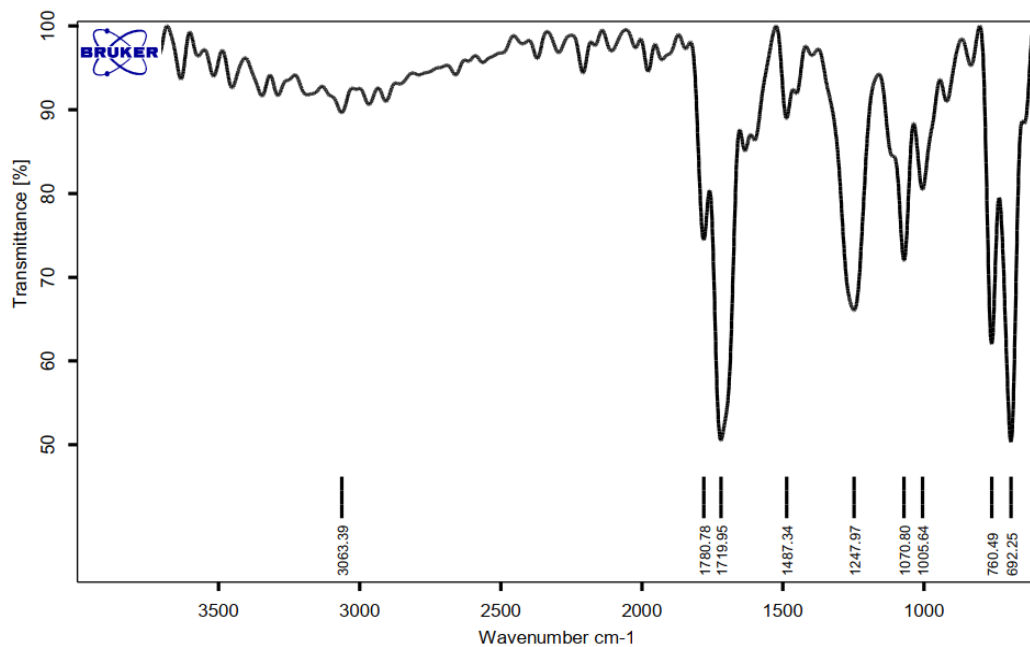

**IR spectrum of compound 2p**

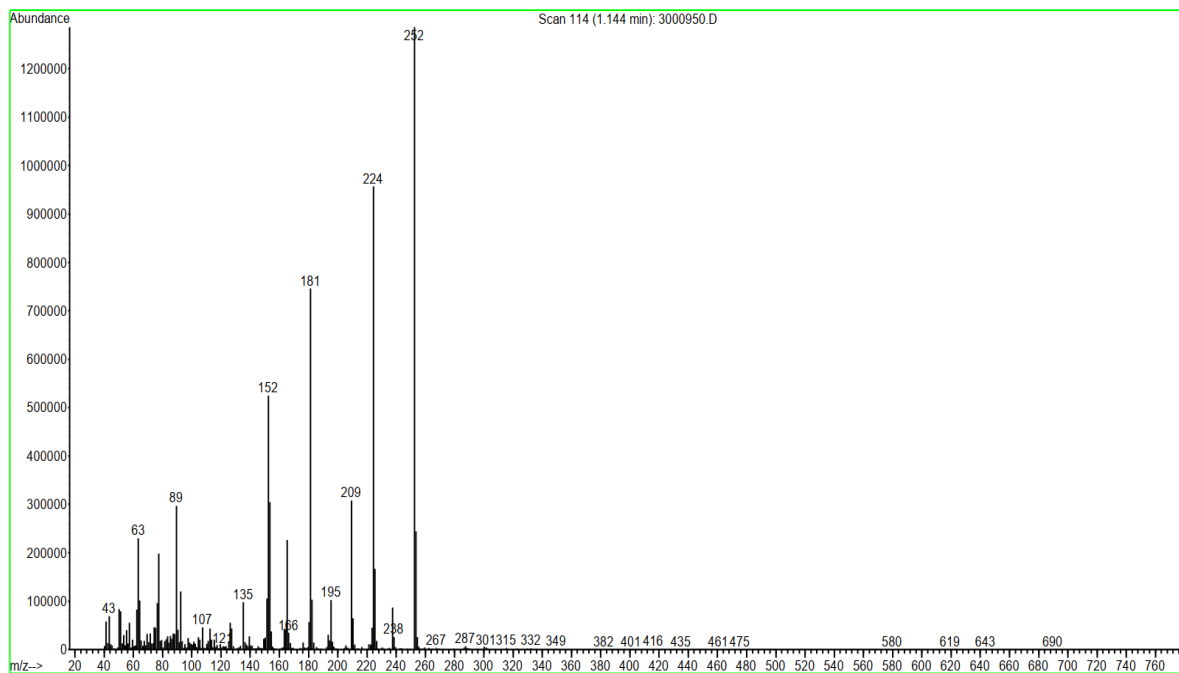

**Mass spectrum of compound 2p with the molecular ion peak at 252**

## F2. <sup>1</sup>H NMR and <sup>13</sup>C NMR spectra of compound 2q

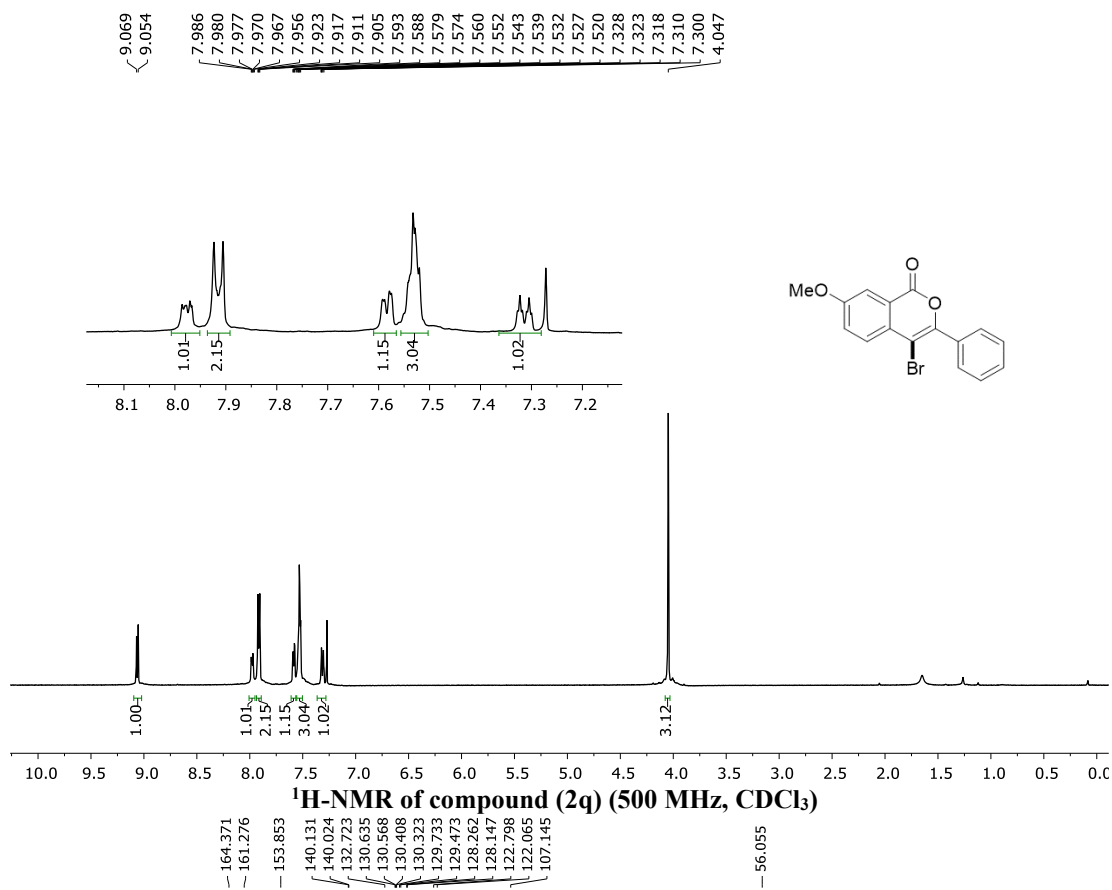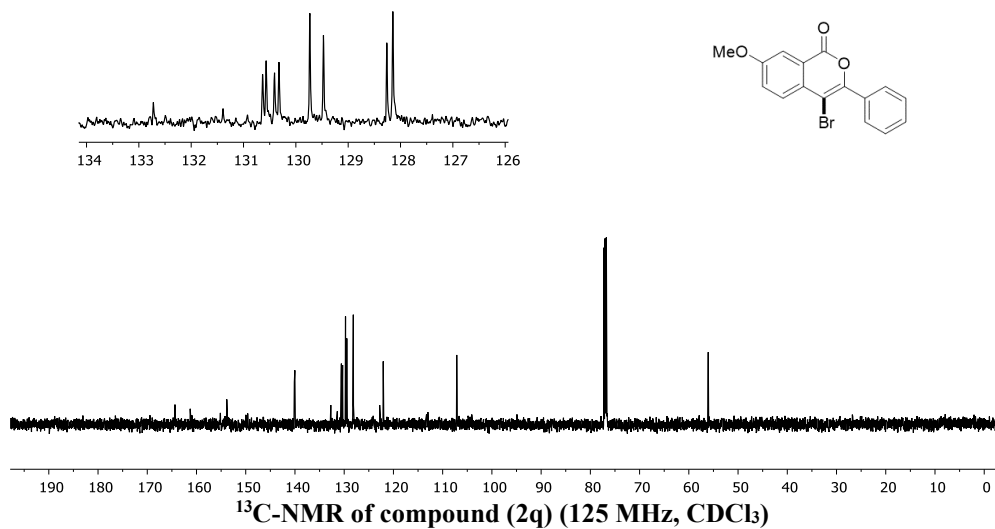



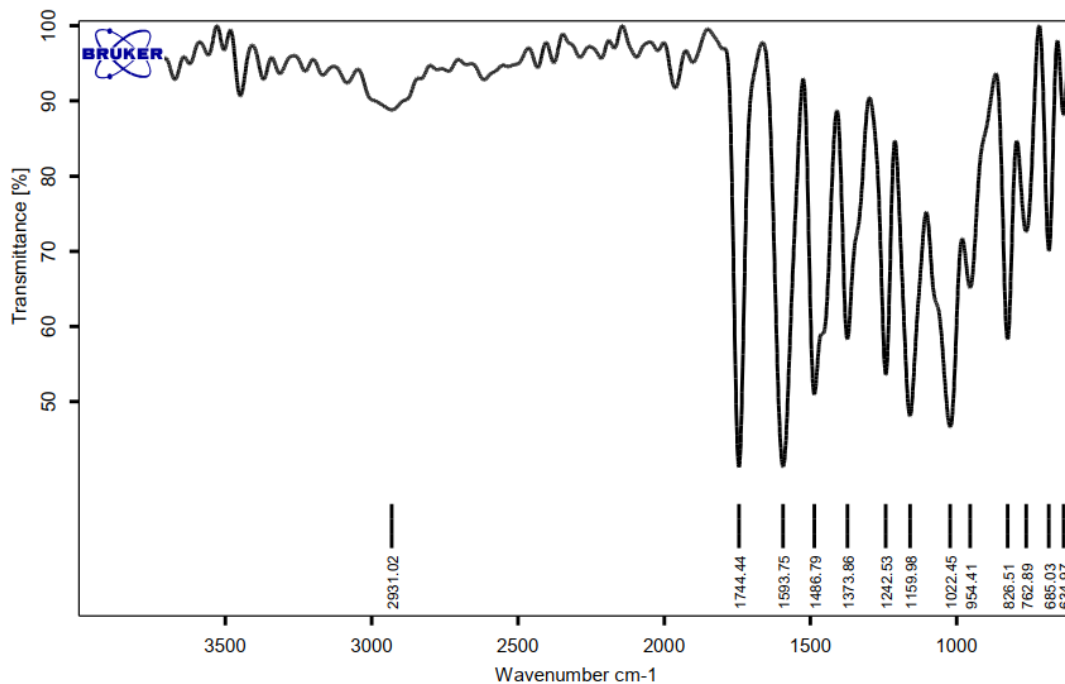

**IR spectrum of compound 2q**

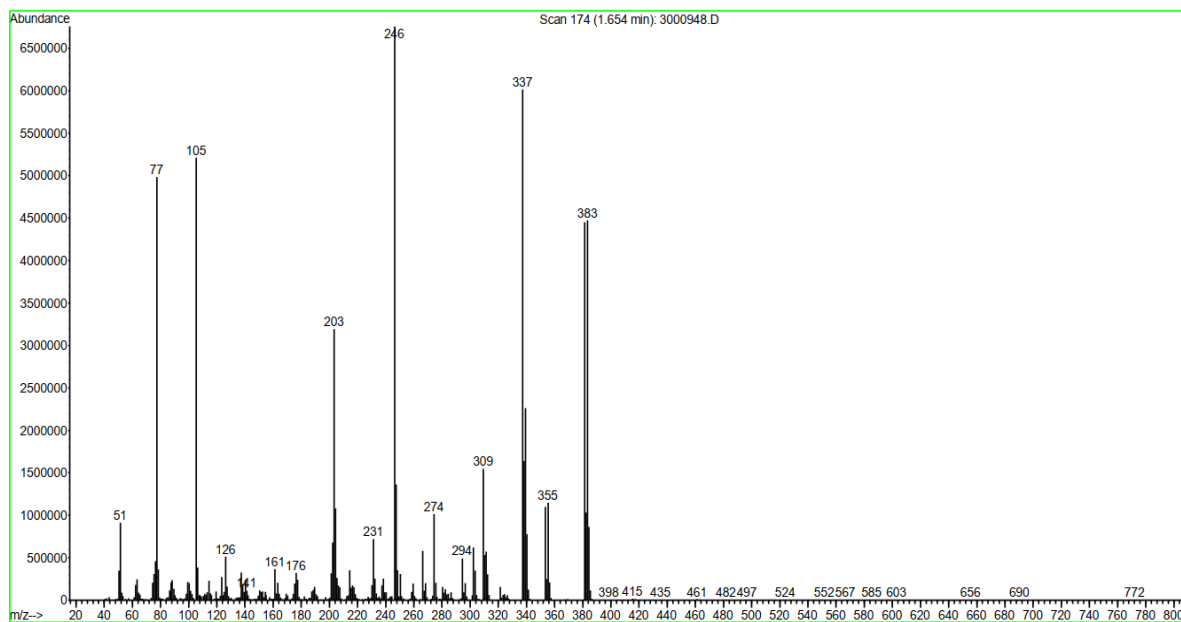

**Mass spectrum of compound 2q with the molecular ion peak at 381**

## Z- matrices

### INT1

|   |             |             |             |
|---|-------------|-------------|-------------|
| C | -0.21184600 | 3.50645100  | -0.00017000 |
| C | 0.03427300  | 2.11526300  | -0.00008300 |
| C | 1.38930900  | 1.68033500  | -0.00003500 |
| C | 2.42374700  | 2.62996100  | -0.00007800 |
| C | 2.15424400  | 3.99226400  | -0.00016100 |
| C | 0.82610500  | 4.42887700  | -0.00020700 |
| H | -1.24361400 | 3.84204600  | -0.00020700 |
| H | 3.44604100  | 2.26898000  | -0.00004300 |
| H | 2.97058700  | 4.70800300  | -0.00018900 |
| H | 0.59894200  | 5.49137000  | -0.00027100 |
| C | -1.10047000 | 1.26017000  | -0.00005400 |
| C | -2.14136900 | 0.63093400  | -0.00004600 |
| C | -3.31891700 | -0.16884200 | -0.00009600 |
| C | -4.59579800 | 0.42737600  | -0.00035900 |
| C | -3.22017400 | -1.57524000 | 0.00012500  |
| C | -5.74026500 | -0.36481500 | -0.00040100 |
| H | -4.67466400 | 1.51020300  | -0.00052800 |
| C | -4.37011800 | -2.35885900 | 0.00008400  |
| H | -2.23627100 | -2.03337200 | 0.00032900  |
| C | -5.63193700 | -1.75787400 | -0.00017900 |
| H | -6.71991000 | 0.10512100  | -0.00060500 |
| H | -4.28291200 | -3.44186600 | 0.00025600  |
| H | -6.52749000 | -2.37310300 | -0.00021200 |

|    |            |             |            |
|----|------------|-------------|------------|
| C  | 1.81346100 | 0.25742800  | 0.00005600 |
| O  | 3.01581000 | -0.04874700 | 0.00000500 |
| O  | 0.84879300 | -0.64945900 | 0.00019900 |
| H  | 1.29156300 | -1.53523300 | 0.00025000 |
| Br | 3.33141200 | -2.60505900 | 0.00026300 |

Electronic Energy (EE) = -3299.706887 Hartree

EE + Thermal Free Energy Correction = -3299.550476 Hartree

Imaginary Freq = 0

### **TS1-endo**

|   |             |             |             |
|---|-------------|-------------|-------------|
| C | 2.21115100  | 1.72216000  | -1.26604100 |
| C | 1.71793400  | 0.83918900  | -0.27320500 |
| C | 2.63925600  | 0.19062500  | 0.59947700  |
| C | 4.00125400  | 0.46614300  | 0.46336500  |
| C | 4.47091400  | 1.32730000  | -0.52794800 |
| C | 3.57187000  | 1.95630500  | -1.39591600 |
| H | 1.49933300  | 2.21301200  | -1.92163200 |
| H | 4.68798300  | -0.00822900 | 1.15592700  |
| H | 5.53726500  | 1.51165200  | -0.61999500 |
| H | 3.93357900  | 2.62988500  | -2.16709300 |
| C | 0.32531900  | 0.66951300  | -0.17089700 |
| C | -0.88417700 | 0.37235100  | -0.17491900 |
| C | -2.27474900 | 0.61557700  | 0.10888800  |
| C | -3.14927100 | -0.41086800 | 0.50444800  |
| C | -2.74838600 | 1.93996500  | 0.02753600  |

|    |             |             |             |
|----|-------------|-------------|-------------|
| C  | -4.46875700 | -0.11029100 | 0.82778500  |
| H  | -2.78325400 | -1.43055400 | 0.53265000  |
| C  | -4.07071800 | 2.22827100  | 0.35256000  |
| H  | -2.07260700 | 2.72974400  | -0.28531200 |
| C  | -4.93308100 | 1.20570000  | 0.75461700  |
| H  | -5.13901500 | -0.90840200 | 1.13353700  |
| H  | -4.42830300 | 3.25196500  | 0.28813400  |
| H  | -5.96585800 | 1.43256200  | 1.00401800  |
| C  | 2.26608700  | -0.74233300 | 1.72976000  |
| O  | 2.89845500  | -0.72940600 | 2.76303400  |
| O  | 1.24547100  | -1.59764300 | 1.56889200  |
| H  | 0.86941200  | -1.62104600 | 0.66264000  |
| Br | -0.60965200 | -1.85148100 | -1.25129500 |

Electronic Energy (EE) = -3299.704418 Hartree

EE + Thermal Free Energy Correction = -3299.544605 Hartree

Imaginary Freq = -120.06

### **TS1-*exo***

|   |             |             |             |
|---|-------------|-------------|-------------|
| C | -3.30913500 | -0.37719900 | 1.48303200  |
| C | -2.41572600 | 0.25592900  | 0.58557900  |
| C | -2.91497400 | 1.19508100  | -0.35196100 |
| C | -4.27198600 | 1.48492800  | -0.38332700 |
| C | -5.14712200 | 0.85399900  | 0.50895600  |
| C | -4.66322100 | -0.07489400 | 1.43833300  |
| H | -2.92239100 | -1.09785600 | 2.19626300  |

|    |             |             |             |
|----|-------------|-------------|-------------|
| H  | -4.65324500 | 2.20217800  | -1.10404900 |
| H  | -6.20815600 | 1.08518100  | 0.47945700  |
| H  | -5.34803300 | -0.56275700 | 2.12567300  |
| C  | -1.04100700 | -0.01727400 | 0.61154300  |
| C  | 0.17002400  | -0.27498900 | 0.48761800  |
| C  | 1.56396600  | -0.06741600 | 0.78999400  |
| C  | 2.34629600  | 0.86922800  | 0.07257100  |
| C  | 2.13829400  | -0.78385600 | 1.85461200  |
| C  | 3.67035800  | 1.08529400  | 0.46875100  |
| C  | 3.46544500  | -0.57369600 | 2.21252000  |
| H  | 1.52733300  | -1.50162300 | 2.39218900  |
| C  | 4.23408200  | 0.36440500  | 1.51868400  |
| H  | 4.24552300  | 1.83462100  | -0.06448200 |
| H  | 3.89744200  | -1.13719700 | 3.03443900  |
| H  | 5.26918700  | 0.53727600  | 1.79857100  |
| Br | 0.17445000  | -1.99272800 | -1.26655200 |
| H  | -2.22125500 | 1.66987500  | -1.03861200 |
| C  | 1.84200700  | 1.72602500  | -1.06484200 |
| O  | 2.23886800  | 2.86066700  | -1.21325200 |
| O  | 0.94797600  | 1.20020200  | -1.92302300 |
| H  | 0.80930600  | 0.23546100  | -1.79231800 |

Electronic Energy (EE) = -3299.705907 Hartree

EE + Thermal Free Energy Correction = -3299.546454 Hartree

Imaginary Freq = -102.01

**INT2-endo**

|   |             |             |             |
|---|-------------|-------------|-------------|
| C | -2.16164600 | -0.89065000 | -1.84643600 |
| C | -1.69927100 | -0.48061300 | -0.55776300 |
| C | -2.66500300 | -0.33475400 | 0.49689000  |
| C | -4.00351600 | -0.62409300 | 0.23201400  |
| C | -4.43093700 | -1.01696200 | -1.03684700 |
| C | -3.50156400 | -1.14328400 | -2.07896500 |
| H | -1.43037800 | -1.00259400 | -2.64037300 |
| H | -4.70907900 | -0.52846100 | 1.05014400  |
| H | -5.48226500 | -1.22346500 | -1.21319000 |
| H | -3.82839100 | -1.44570600 | -3.06978000 |
| C | -0.33250800 | -0.31116000 | -0.38220100 |
| C | 0.87121700  | 0.16348600  | -0.33165800 |
| C | 2.15931900  | -0.50908200 | -0.08292400 |
| C | 3.33662400  | 0.18457400  | 0.22876000  |
| C | 2.19410500  | -1.91533300 | -0.14451700 |
| C | 4.51879600  | -0.51205400 | 0.47789600  |
| H | 3.32294900  | 1.26706200  | 0.27925900  |
| C | 3.37568800  | -2.60437300 | 0.10556800  |
| H | 1.28727800  | -2.45945200 | -0.39166200 |
| C | 4.54494900  | -1.90500500 | 0.41793200  |
| H | 5.42178500  | 0.04097900  | 0.72067300  |
| H | 3.38506000  | -3.68949500 | 0.05262400  |
| H | 5.46849800  | -2.44374700 | 0.61055400  |
| C | -2.36186100 | 0.09950400  | 1.90885500  |

|    |             |             |             |
|----|-------------|-------------|-------------|
| O  | -3.09725900 | -0.18752100 | 2.82715100  |
| O  | -1.26254300 | 0.84673500  | 2.14054900  |
| H  | -0.78557600 | 1.07309000  | 1.32272100  |
| Br | 0.94749100  | 2.16962500  | -0.59720500 |

Electronic Energy (EE) = -3299.709192 Hartree

EE + Thermal Free Energy Correction = -3299.551472 Hartree

Imaginary Freq = 0

### **INT2-*exo***

|   |             |             |             |
|---|-------------|-------------|-------------|
| C | 3.22410500  | 0.27415100  | 1.49412400  |
| C | 2.34945000  | -0.20096500 | 0.47674600  |
| C | 2.86955200  | -1.06201900 | -0.53314700 |
| C | 4.20869300  | -1.41895200 | -0.51777000 |
| C | 5.05911500  | -0.94089000 | 0.48872200  |
| C | 4.56000900  | -0.09567400 | 1.48943500  |
| H | 2.83047400  | 0.92858200  | 2.26521200  |
| H | 4.59849100  | -2.07301000 | -1.29243400 |
| H | 6.10710100  | -1.22625900 | 0.49381400  |
| H | 5.22266600  | 0.27356200  | 2.26699200  |
| C | 1.00309300  | 0.13624800  | 0.45980000  |
| C | -0.18834700 | 0.54776000  | 0.26009400  |
| C | -1.51699300 | 0.05712900  | 0.66849300  |
| C | -2.16199100 | -0.99742800 | -0.01472900 |
| C | -2.13226300 | 0.63359100  | 1.78907600  |
| C | -3.38796400 | -1.47133100 | 0.47155300  |

|    |             |             |             |
|----|-------------|-------------|-------------|
| C  | -3.36249900 | 0.16679900  | 2.24267400  |
| H  | -1.62906500 | 1.44770000  | 2.30155800  |
| C  | -3.99181600 | -0.89173800 | 1.58321000  |
| H  | -3.85169600 | -2.30529100 | -0.04435900 |
| H  | -3.82534700 | 0.62411400  | 3.11261000  |
| H  | -4.94848000 | -1.26574200 | 1.93628600  |
| Br | -0.38789600 | 2.23097000  | -0.97910800 |
| H  | 2.19938500  | -1.42426100 | -1.30644400 |
| C  | -1.61655500 | -1.71242500 | -1.22705300 |
| O  | -1.85138400 | -2.88167000 | -1.43198800 |
| O  | -0.87177400 | -1.01197200 | -2.11238900 |
| H  | -0.83543900 | -0.05976700 | -1.89681600 |

Electronic Energy (EE) = -3299.707567 Hartree

EE + Thermal Free Energy Correction = -3299.548712 Hartree

Imaginary Freq = 0

**TS2-endo**

|   |             |             |             |
|---|-------------|-------------|-------------|
| C | -2.26658000 | -1.47942800 | 0.48271600  |
| C | -1.77162400 | -0.21086400 | 0.11024200  |
| C | -2.69873000 | 0.84318400  | -0.10221900 |
| C | -4.06937100 | 0.61176300  | 0.00669800  |
| C | -4.54288400 | -0.65403300 | 0.34404100  |
| C | -3.63662500 | -1.69186600 | 0.58781900  |
| H | -1.57435400 | -2.29086800 | 0.66590800  |
| H | -4.74371200 | 1.44545000  | -0.15971400 |



|    |             |             |             |
|----|-------------|-------------|-------------|
| H  | -5.61104300 | -0.83039700 | 0.43102400  |
| H  | -4.00119300 | -2.67767100 | 0.86328300  |
| C  | -0.37364400 | 0.11895500  | -0.03990800 |
| C  | 0.84876800  | -0.42640800 | -0.02029900 |
| C  | 2.12204500  | 0.30392000  | 0.09403300  |
| C  | 2.12290800  | 1.59279300  | 0.66696900  |
| C  | 3.34070700  | -0.22827000 | -0.36202900 |
| C  | 3.30226600  | 2.32401200  | 0.76327300  |
| H  | 1.19847100  | 2.01911800  | 1.04135000  |
| C  | 4.51773100  | 0.50918500  | -0.26199400 |
| H  | 3.36195200  | -1.21904000 | -0.80120000 |
| C  | 4.50539700  | 1.78663200  | 0.29987600  |
| H  | 3.28075600  | 3.31407900  | 1.20948300  |
| H  | 5.44755700  | 0.08189800  | -0.62666200 |
| H  | 5.42603000  | 2.35773300  | 0.38044200  |
| C  | -2.25421200 | 2.25088900  | -0.39582200 |
| O  | -3.03808300 | 3.17407000  | -0.54193800 |
| O  | -0.94369100 | 2.46817800  | -0.48269900 |
| H  | -0.38928200 | 1.35591900  | -0.34345400 |
| Br | 0.98806000  | -2.35991400 | -0.21439200 |

Electronic Energy (EE) = -3299.691577 Hartree

EE + Thermal Free Energy Correction = -3299.536048 Hartree

Imaginary Freq = -1471.30

**TS2-*exo***

|    |             |             |             |
|----|-------------|-------------|-------------|
| C  | -2.90052400 | -0.38998000 | 0.90813400  |
| C  | -2.13959600 | 0.52607800  | 0.14745300  |
| C  | -2.80278500 | 1.58509700  | -0.51085800 |
| C  | -4.18652500 | 1.70018000  | -0.44323300 |
| C  | -4.93040600 | 0.77446200  | 0.29467600  |
| C  | -4.28327600 | -0.26726800 | 0.96907100  |
| H  | -2.39493300 | -1.19807200 | 1.42486400  |
| H  | -4.68662600 | 2.51431400  | -0.95970400 |
| H  | -6.01147400 | 0.86732200  | 0.35049800  |
| H  | -4.86162300 | -0.98239900 | 1.54729800  |
| C  | -0.70061200 | 0.45055600  | 0.08119800  |
| C  | 0.24252100  | -0.48174000 | -0.02871500 |
| C  | 1.70603400  | -0.29545000 | 0.11548400  |
| C  | 2.37290200  | 0.97055500  | 0.06133700  |
| C  | 2.50105300  | -1.43781500 | 0.33128400  |
| C  | 3.77010600  | 1.00257800  | 0.19537400  |
| C  | 3.88119100  | -1.37238300 | 0.48342200  |
| H  | 2.01687000  | -2.40429000 | 0.38046100  |
| C  | 4.52793000  | -0.14267700 | 0.40802800  |
| H  | 4.24884800  | 1.97245900  | 0.12876400  |
| H  | 4.44276100  | -2.28623400 | 0.65579400  |
| H  | 5.60628400  | -0.07068300 | 0.51450000  |
| Br | -0.38344100 | -2.27477300 | -0.49017500 |
| H  | -2.21599100 | 2.30926700  | -1.06829400 |

|   |             |            |             |
|---|-------------|------------|-------------|
| C | 1.79952900  | 2.35773100 | -0.13974400 |
| O | 2.52563000  | 3.31460500 | -0.38263500 |
| O | 0.51104700  | 2.61591200 | -0.01561700 |
| H | -0.16235700 | 1.57169500 | 0.13049400  |

Electronic Energy (EE) = -3299.687080 Hartree

EE + Thermal Free Energy Correction = -3299.532167 Hartree

Imaginary Freq = -1212.75

**INT3-endo**

|   |             |             |             |
|---|-------------|-------------|-------------|
| C | -1.52208500 | 1.91417700  | 0.88166800  |
| C | -1.50177900 | 0.91897400  | -0.08991500 |
| C | -2.66592300 | 0.25693300  | -0.45625900 |
| C | -3.89679000 | 0.55364400  | 0.12483500  |
| C | -3.92755800 | 1.55172000  | 1.09839200  |
| C | -2.75203300 | 2.22204100  | 1.47096300  |
| H | -0.61600300 | 2.43210600  | 1.18387200  |
| H | -4.79147900 | 0.01877200  | -0.17911800 |
| H | -4.86701300 | 1.81422900  | 1.57627200  |
| H | -2.79883100 | 2.99429900  | 2.23396100  |
| C | -0.35899600 | 0.36497600  | -0.92172000 |
| C | 0.77810400  | -0.22318700 | -0.14226300 |
| C | 2.14174600  | 0.18729800  | -0.18876000 |
| C | 2.57485000  | 1.22179400  | -1.07210600 |
| C | 3.13685900  | -0.40411200 | 0.64218100  |
| C | 3.90120300  | 1.62463900  | -1.11330900 |

|    |             |             |             |
|----|-------------|-------------|-------------|
| H  | 1.86979900  | 1.70549200  | -1.73872000 |
| C  | 4.45865500  | 0.00990400  | 0.59076400  |
| H  | 2.84561600  | -1.19286100 | 1.32550900  |
| C  | 4.85735300  | 1.02710200  | -0.28429700 |
| H  | 4.19478400  | 2.41195300  | -1.80234400 |
| H  | 5.18902200  | -0.46557700 | 1.23982200  |
| H  | 5.89439800  | 1.34725300  | -0.32150000 |
| C  | -2.33814100 | -0.74198700 | -1.49833200 |
| O  | -3.05218200 | -1.51860600 | -2.07841900 |
| O  | -0.98517400 | -0.64937100 | -1.75070700 |
| H  | 0.02208400  | 1.13091000  | -1.60298900 |
| Br | 0.22981900  | -1.65017900 | 0.98477700  |

Electronic Energy (EE) = -3299.748361 Hartree

EE + Thermal Free Energy Correction = -3299.584792 Hartree

Imaginary Freq = 0

### **INT3-*exo***

|   |             |             |             |
|---|-------------|-------------|-------------|
| C | -2.81124600 | -0.07343100 | -0.64302000 |
| C | -2.10913400 | 0.48589900  | 0.44188100  |
| C | -2.83981800 | 1.16075800  | 1.43984800  |
| C | -4.22798100 | 1.23499900  | 1.38432200  |
| C | -4.91236200 | 0.66029400  | 0.31116600  |
| C | -4.19861900 | 0.01692600  | -0.70346800 |
| H | -2.26822400 | -0.55460800 | -1.44656700 |
| H | -4.77417000 | 1.74928900  | 2.16992200  |

|    |             |             |             |
|----|-------------|-------------|-------------|
| H  | -5.99573400 | 0.72430800  | 0.25850600  |
| H  | -4.72577000 | -0.40898200 | -1.55251100 |
| C  | -0.65588800 | 0.45879200  | 0.57748600  |
| C  | 0.27937700  | -0.45878200 | 0.18284000  |
| C  | 1.72288700  | -0.23686300 | 0.35324800  |
| C  | 2.30486400  | 0.97688900  | -0.07360800 |
| C  | 2.53493900  | -1.20594100 | 0.96754100  |
| C  | 3.66101500  | 1.21774200  | 0.16798900  |
| C  | 3.88032400  | -0.94917800 | 1.20870200  |
| H  | 2.09565200  | -2.15246600 | 1.26662600  |
| C  | 4.44551700  | 0.26917400  | 0.81713800  |
| H  | 4.08179100  | 2.15016700  | -0.19483600 |
| H  | 4.49017800  | -1.70015200 | 1.70303600  |
| H  | 5.49820900  | 0.46605300  | 0.99891300  |
| Br | -0.20034500 | -2.14448500 | -0.57580000 |
| H  | -2.30682800 | 1.62071900  | 2.26833500  |
| C  | 1.55986700  | 2.00235700  | -0.88923300 |
| O  | 2.14873800  | 2.93243000  | -1.44306100 |
| O  | 0.27219200  | 1.88703500  | -1.02956400 |
| H  | -0.25292700 | 1.24911300  | 1.20557000  |

Electronic Energy (EE) = -3299.710768 Hartree

EE + Thermal Free Energy Correction = -3299.550230 Hartree

Imaginary Freq = 0

**TS3-endo**

|   |             |             |             |
|---|-------------|-------------|-------------|
| C | -2.57089400 | -0.63799000 | -1.97798000 |
| C | -1.70245800 | -0.58650100 | -0.87527400 |
| C | -2.24060400 | -0.49365900 | 0.42800100  |
| C | -3.62035100 | -0.38659100 | 0.60116800  |
| C | -4.47158700 | -0.38352100 | -0.50375400 |
| C | -3.94617300 | -0.52212700 | -1.79268300 |
| H | -2.15920100 | -0.73644900 | -2.97904700 |
| H | -4.00571400 | -0.34017500 | 1.61468900  |
| H | -5.54527400 | -0.30035300 | -0.36072900 |
| H | -4.60981500 | -0.54081700 | -2.65267500 |
| C | -0.25947400 | -0.67511800 | -1.03094700 |
| C | 0.64582500  | 0.08764200  | -0.30107900 |
| C | 2.07987100  | -0.24087500 | -0.24372200 |
| C | 3.08889700  | 0.72538000  | -0.38751500 |
| C | 2.44584400  | -1.58977600 | -0.07512600 |
| C | 4.42901100  | 0.34634500  | -0.39434800 |
| H | 2.81820600  | 1.76902400  | -0.50138100 |
| C | 3.78685400  | -1.96167900 | -0.07704000 |
| H | 1.67325500  | -2.33029500 | 0.10180500  |
| C | 4.78241900  | -0.99572300 | -0.24210300 |
| H | 5.19878900  | 1.10301100  | -0.51603300 |
| H | 4.05545000  | -3.00431800 | 0.06693200  |
| H | 5.82932100  | -1.28646200 | -0.23922600 |
| C | -1.37505200 | -0.65058600 | 1.65607900  |

|    |             |             |             |
|----|-------------|-------------|-------------|
| O  | -1.87435300 | -0.74532100 | 2.77284900  |
| O  | -0.07260200 | -0.72945300 | 1.50419600  |
| Br | 0.16384300  | 1.90578000  | 0.12066400  |
| H  | 0.15332800  | -1.44860600 | -1.67599200 |

Electronic Energy (EE) = -3299.702160 Hartree

EE + Thermal Free Energy Correction = -3299.540149 Hartree

Imaginary Freq = -337.01

### **INT4-*exo***

|   |             |             |             |
|---|-------------|-------------|-------------|
| C | 2.71460500  | -0.56667200 | -0.61832700 |
| C | 2.22348000  | -0.21319900 | 0.66853500  |
| C | 3.15590100  | -0.14441400 | 1.74031900  |
| C | 4.49817000  | -0.42926400 | 1.54352900  |
| C | 4.96025400  | -0.78173200 | 0.26923700  |
| C | 4.06200800  | -0.84253600 | -0.80343200 |
| H | 2.03221300  | -0.60852200 | -1.45718600 |
| H | 5.19081400  | -0.37454600 | 2.37880400  |
| H | 6.01240400  | -1.00236800 | 0.11275200  |
| H | 4.42054900  | -1.10541000 | -1.79475700 |
| C | 0.86034900  | 0.08856300  | 0.94636100  |
| C | -0.27187700 | 0.03627200  | 0.04838000  |
| C | -1.65452200 | -0.05786100 | 0.61091200  |
| C | -2.34502100 | -1.01074100 | -0.13188800 |
| C | -2.27325800 | 0.61077100  | 1.66321000  |
| C | -3.67077400 | -1.34082500 | 0.13911800  |

|    |             |             |             |
|----|-------------|-------------|-------------|
| C  | -3.59995300 | 0.28068300  | 1.94885700  |
| H  | -1.75660500 | 1.37922300  | 2.23005900  |
| C  | -4.29407000 | -0.68247000 | 1.19841500  |
| H  | -4.18705700 | -2.08632200 | -0.45762000 |
| H  | -4.10906100 | 0.78598400  | 2.76479100  |
| H  | -5.32654100 | -0.91063200 | 1.44585600  |
| Br | -0.25116100 | 1.97131300  | -0.97514100 |
| H  | 2.79916600  | 0.13284700  | 2.72930200  |
| C  | -1.43996800 | -1.54028000 | -1.16720800 |
| O  | -1.60568500 | -2.35907400 | -2.02817100 |
| O  | -0.20298900 | -0.90790300 | -0.98274200 |
| H  | 0.63219100  | 0.49182200  | 1.92914500  |

Electronic Energy (EE) = -3299.752911 Hartree

EE + Thermal Free Energy Correction = -3299.590367 Hartree

Imaginary Freq = 0

#### **INT4-endo**

|   |             |             |             |
|---|-------------|-------------|-------------|
| C | -2.62801300 | 0.79047700  | -1.43201700 |
| C | -1.68910800 | 0.01785300  | -0.72699200 |
| C | -2.14206900 | -1.08504500 | 0.02589000  |
| C | -3.50663300 | -1.40332700 | 0.07781900  |
| C | -4.42136900 | -0.62959400 | -0.62370000 |
| C | -3.97696200 | 0.46729900  | -1.37928200 |
| H | -2.28843200 | 1.65304300  | -1.99766200 |
| H | -3.82004200 | -2.25648800 | 0.67006400  |



|    |             |             |             |
|----|-------------|-------------|-------------|
| H  | -5.47944500 | -0.87062400 | -0.58638100 |
| H  | -4.69546200 | 1.07260600  | -1.92474200 |
| C  | -0.27108900 | 0.30443400  | -0.76220000 |
| C  | 0.62297900  | -0.57429200 | -0.15783700 |
| C  | 2.07556600  | -0.53088900 | -0.28248100 |
| C  | 2.73128400  | 0.64799900  | -0.69183800 |
| C  | 2.83984200  | -1.68219900 | -0.00635600 |
| C  | 4.11281100  | 0.65980300  | -0.84558300 |
| H  | 2.16425800  | 1.56383400  | -0.82001200 |
| C  | 4.22139000  | -1.66039000 | -0.16675400 |
| H  | 2.34040500  | -2.58657100 | 0.32222400  |
| C  | 4.86165100  | -0.49338800 | -0.59151500 |
| H  | 4.61011700  | 1.57667800  | -1.14838200 |
| H  | 4.80031200  | -2.55577100 | 0.04048000  |
| H  | 5.94128200  | -0.47814700 | -0.71238700 |
| C  | -1.18872500 | -1.92317600 | 0.75886300  |
| O  | -1.44159800 | -2.86696500 | 1.46252100  |
| O  | 0.17013900  | -1.59674100 | 0.60182200  |
| Br | -0.09589800 | 2.29064000  | 0.91364600  |
| H  | 0.10579000  | 0.98529500  | -1.51167300 |

Electronic Energy (EE) = -3299.767921 Hartree

EE + Thermal Free Energy Correction = -3299.603380 Hartree

Imaginary Freq = 0

**TS1-SRA**

|   |             |             |             |
|---|-------------|-------------|-------------|
| C | -2.15659000 | -1.62189700 | 0.06004500  |
| C | -1.95398600 | -0.22414500 | 0.05948500  |
| C | -3.08384400 | 0.64106200  | 0.02799300  |
| C | -4.36857200 | 0.08568300  | -0.02727200 |
| C | -4.55650300 | -1.29195200 | -0.03556600 |
| C | -3.44596900 | -2.14035700 | 0.01205800  |
| H | -1.28829900 | -2.27816200 | 0.09305900  |
| H | -5.20962800 | 0.76992100  | -0.05900400 |
| H | -5.56253500 | -1.70252200 | -0.07402300 |
| H | -3.57953700 | -3.21933500 | 0.00961900  |
| C | -0.61511500 | 0.27503100  | 0.06913600  |
| C | 0.62667100  | 0.38343100  | -0.06018300 |
| C | 1.77877700  | 1.26143800  | -0.03944300 |
| C | 1.59421200  | 2.61229600  | -0.39717100 |
| C | 3.05711400  | 0.81892900  | 0.34301600  |
| C | 2.66511000  | 3.50224300  | -0.36788900 |
| H | 0.61024300  | 2.95425000  | -0.70412400 |
| C | 4.11903300  | 1.72061900  | 0.36913700  |
| H | 3.18741000  | -0.22038900 | 0.62993800  |
| C | 3.93291700  | 3.05933800  | 0.01503600  |
| H | 2.50743000  | 4.54042100  | -0.65011600 |
| H | 5.10348500  | 1.37022000  | 0.66969800  |
| H | 4.77046200  | 3.75311900  | 0.03547800  |
| C | -3.02895500 | 2.14384900  | 0.07068600  |

|   |             |             |             |
|---|-------------|-------------|-------------|
| O | -4.00927500 | 2.83889700  | -0.11216100 |
| O | -1.84373700 | 2.72834000  | 0.35129500  |
| H | -1.14975600 | 2.03709300  | 0.47756100  |
| S | 1.67638300  | -2.56149300 | 0.00819200  |
| O | 2.52967900  | -3.21559000 | -1.02969400 |
| O | 0.43331900  | -3.30260800 | 0.32629600  |
| O | 1.28094900  | -1.25422300 | -0.88672400 |
| O | 2.40941500  | -2.09158400 | 1.20679200  |

Electronic Energy (EE) = -1427.063433 Hartree

EE + Thermal Free Energy Correction = -1426.893245 Hartree

Imaginary Freq = -519.62

### **HBr**

|    |            |            |             |
|----|------------|------------|-------------|
| Br | 0.00000000 | 0.00000000 | 0.03994000  |
| H  | 0.00000000 | 0.00000000 | -1.39789000 |

Electronic Energy (EE) = -2572.301284 Hartree

EE + Thermal Free Energy Correction = -2572.314619 Hartree

Imaginary Freq = 0

### **CR**

|   |            |             |             |
|---|------------|-------------|-------------|
| C | 3.64700200 | -2.11293200 | -0.00001800 |
| C | 4.45442500 | -0.96991900 | -0.00007100 |
| C | 3.86296900 | 0.29024700  | -0.00009800 |
| C | 2.47191400 | 0.41493400  | -0.00007200 |
| C | 1.64690600 | -0.73405400 | -0.00001700 |

|   |             |             |             |
|---|-------------|-------------|-------------|
| H | 4.46336700  | 1.19525400  | -0.00014000 |
| C | 0.23141700  | -0.60674400 | 0.00000600  |
| C | -0.98574600 | -0.52494400 | 0.00002600  |
| C | -2.39620600 | -0.34146000 | 0.00004900  |
| C | -3.27079000 | -1.44591200 | 0.00011200  |
| C | -2.93003100 | 0.96387800  | 0.00000800  |
| C | -4.64815300 | -1.24529900 | 0.00013200  |
| H | -2.85949400 | -2.45065500 | 0.00014400  |
| C | -4.30887400 | 1.15093600  | 0.00002900  |
| H | -2.25042400 | 1.80995300  | -0.00004000 |
| C | -5.17066300 | 0.05057700  | 0.00009100  |
| H | -5.31619900 | -2.10214100 | 0.00018100  |
| H | -4.71316700 | 2.15934300  | -0.00000300 |
| H | -6.24651300 | 0.20239400  | 0.00010700  |
| C | 1.88076100  | 1.77131300  | -0.00010500 |
| O | 2.54025400  | 2.82961300  | -0.00007600 |
| O | 0.60722800  | 1.95609300  | -0.00000800 |
| H | 5.53612300  | -1.06464800 | -0.00009200 |
| H | 4.10374900  | -3.09874800 | 0.00000100  |
| C | 2.25974600  | -2.00185000 | 0.00000800  |
| H | 1.63465000  | -2.88902300 | 0.00004700  |

Electronic Energy (EE) = -727.364050 Hartree

EE + Thermal Free Energy Correction = -727.215752 Hartree

Imaginary Freq = 0

## G. References

1. J. H. Park, S. V. Bhilare and S. W. Youn, *Org. Lett.*, 2011, **13**, 2228-2231.
2. T. Godet, C. Vaxelaire, C. Michel, A. Milet and P. Belmont, *Chem. Eur. J.*, 2007, **13**, 5632-5641.
3. A. K. Verma, V. Rustagi, T. Aggarwal and A. P. Singh, *J. Org. Chem.*, 2010, **75**, 7691-7703.
4. A. Chandra, B. Singh, S. Upadhyay and R. M. Singh, *Tetrahedron*, 2008, **64**, 11680-11685.
5. H. Janatian Ghazvini, T. J. J. Müller, F. Rominger and S. Balalaie, *J. Org. Chem.*, 2019, **84**, 10740-10748.
6. A. Bontemps, G. Mariaule, S. Desbène-Finck, P. Helissey, S. Giorgi-Renault, V. Michelet and P. Belmont, *Synthesis*, 2016, **48**, 2178-2190.
7. A. G. Krishna Reddy and G. Satyanarayana, *Synthesis*, 2017, **49**, 5149-5158.
8. M. Saifuddin, S. Samala, D. G. V. Krishna and B. Kundu, *Synthesis*, 2013, **45**, 1553-1563.
9. O. Meth-Cohn, B. Narine and B. Tarnowski, *J. Chem. Soc. Perkin Trans. I*, 1981, 1520-1530.
10. M. W. Read and P. S. Ray, *J. Heterocycl. Chem.*, 1995, **32**, 1595-1597.
